# Supplementary material for: CRISPR-mediated MECOM depletion retards tumor growth by reducing cancer stem cell properties in lung squamous cell carcinoma
Source: PubMed Central journal article supplement — Mol Ther. 2022 Jun 22;30(11):3341–57. doi: 10.1016/j.ymthe.2022.06.011 (PMC9637721; doi:10.1016/j.ymthe.2022.06.011), 2022-06-22
Supplement: mmc1.pdf [file mmc1.pdf]

## Supplemental Information

**CRISPR-mediated *MECOM* depletion retards tumor growth by reducing cancer stem cell properties in lung squamous cell carcinoma**

**Yuanyuan Ma, Bin Kang, Shaolei Li, Guoyun Xie, Jiwang Bi, Fuqiang Li, Guo An, Bing Liu, Jing Li, Yue Shen, Xun Xu, Huanming Yang, Yue Yang, Ying Gu, and Nan Wu**

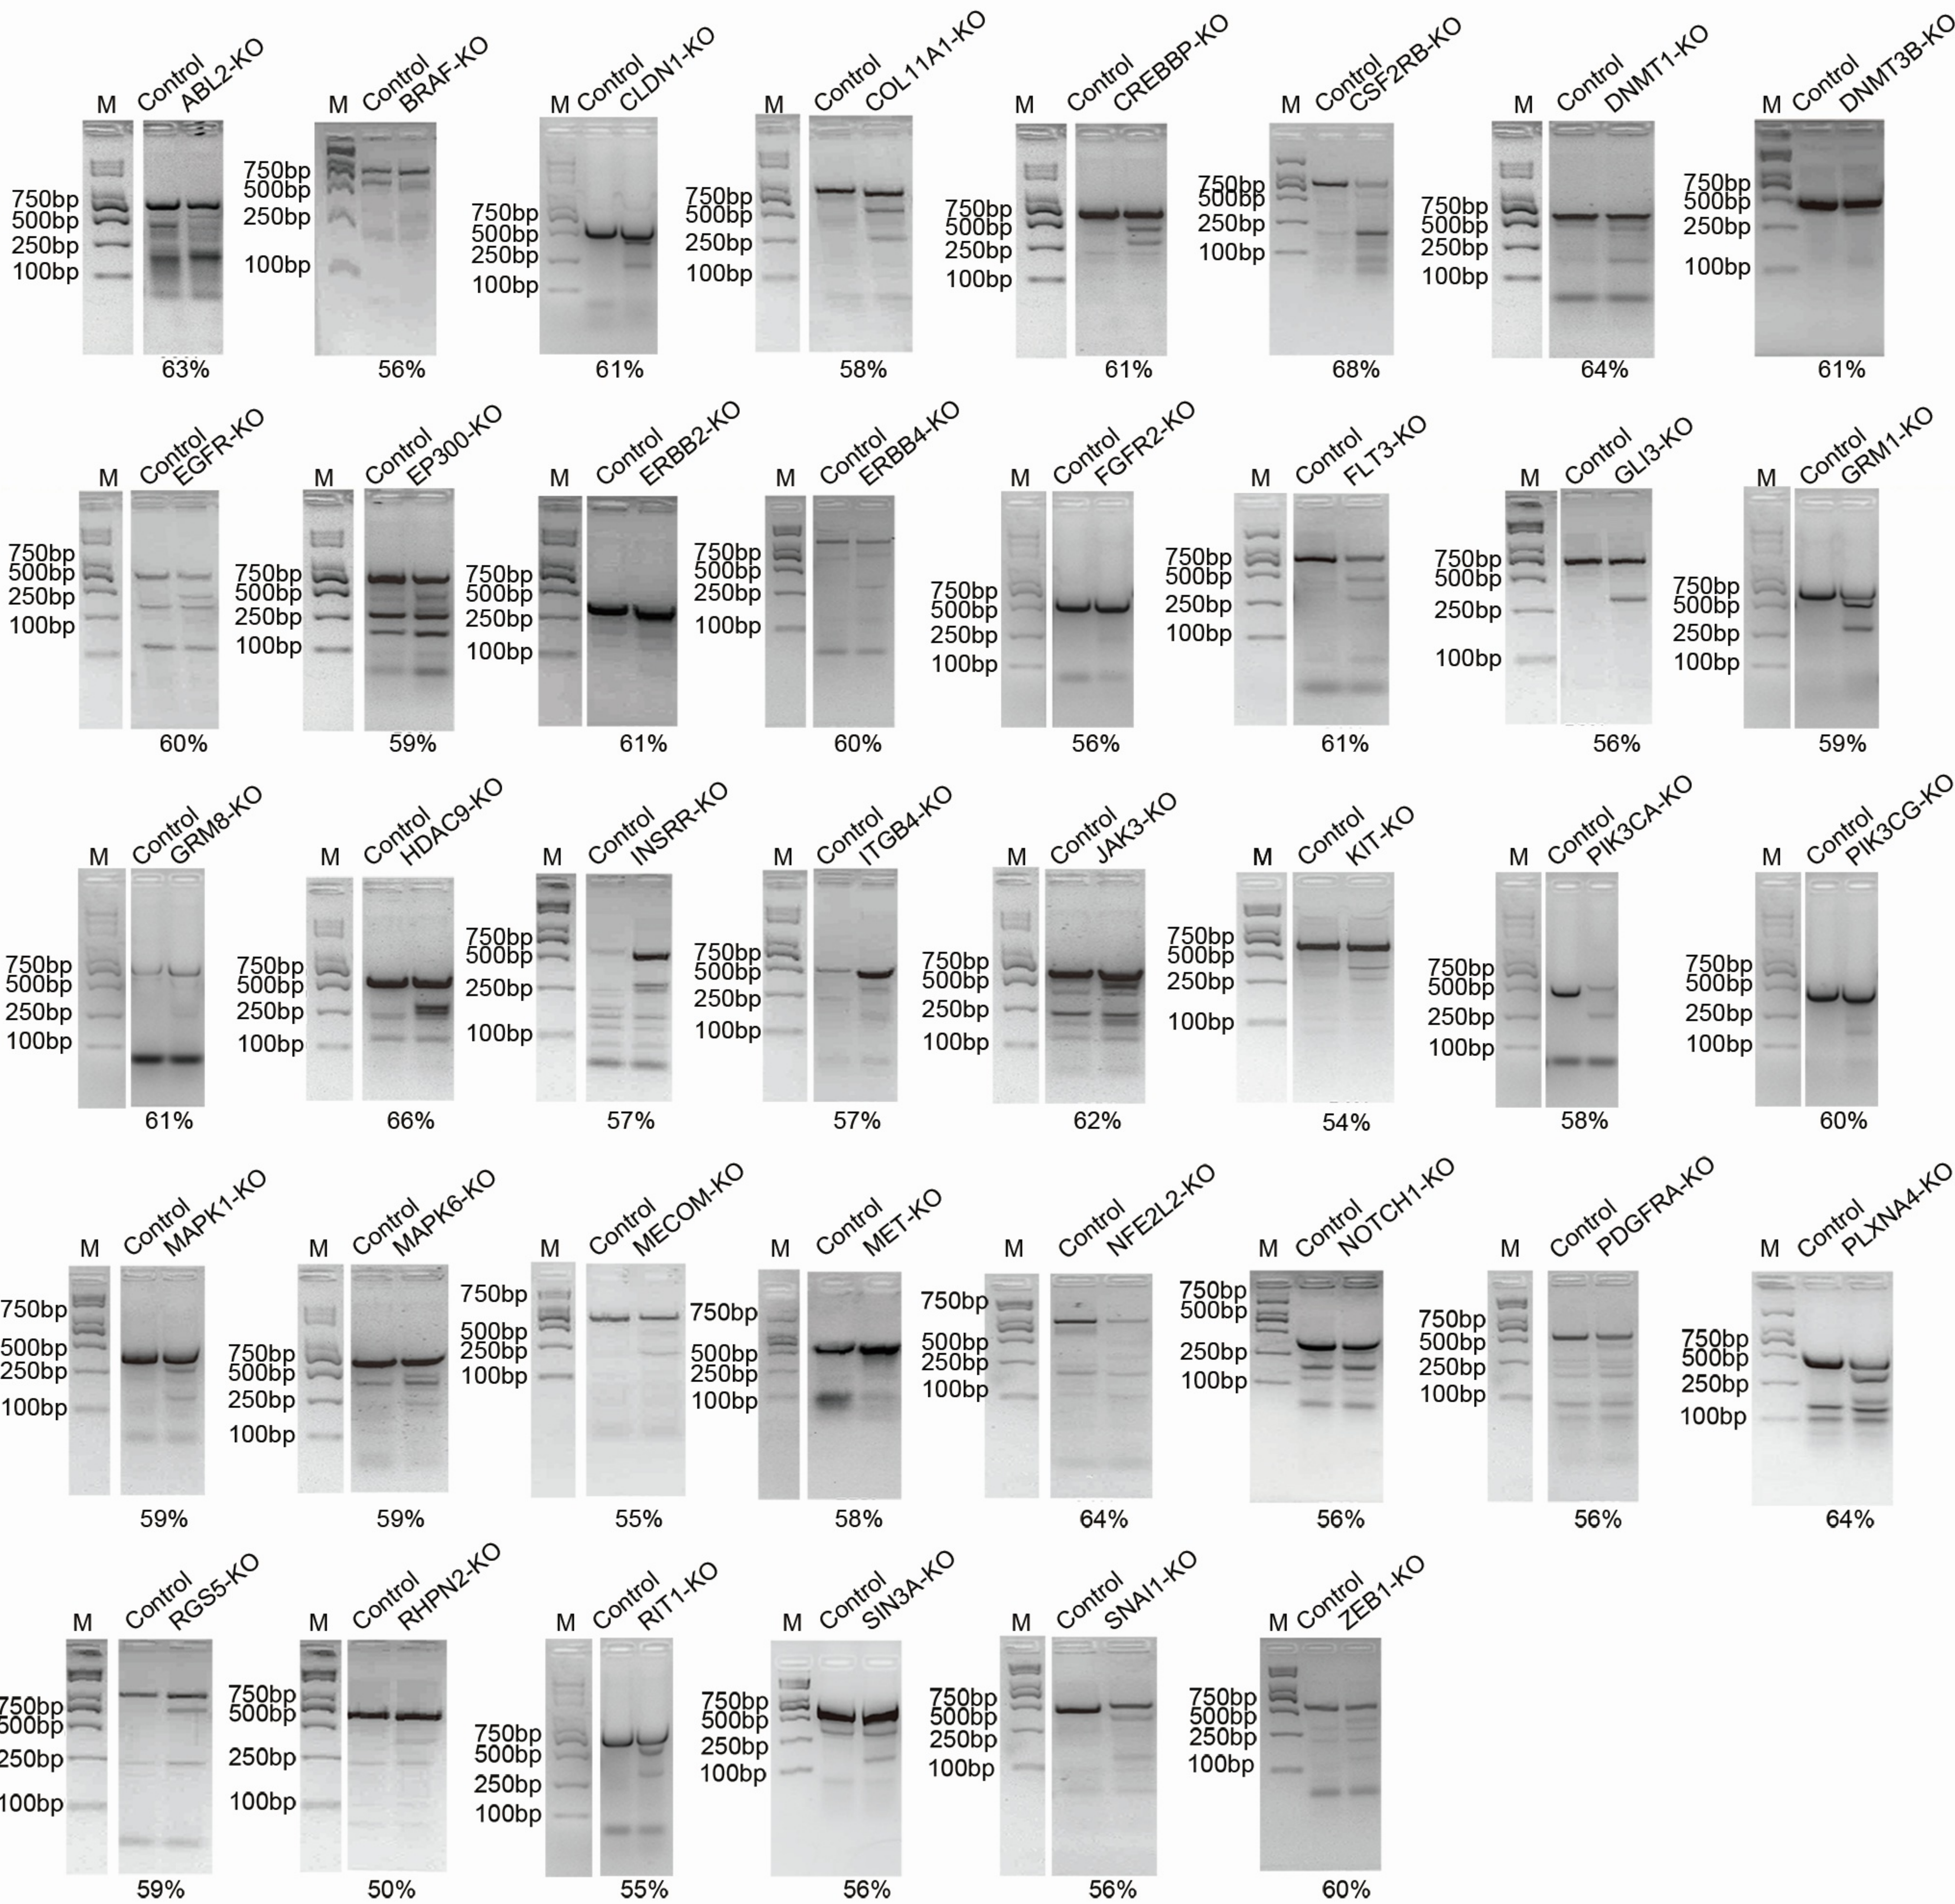

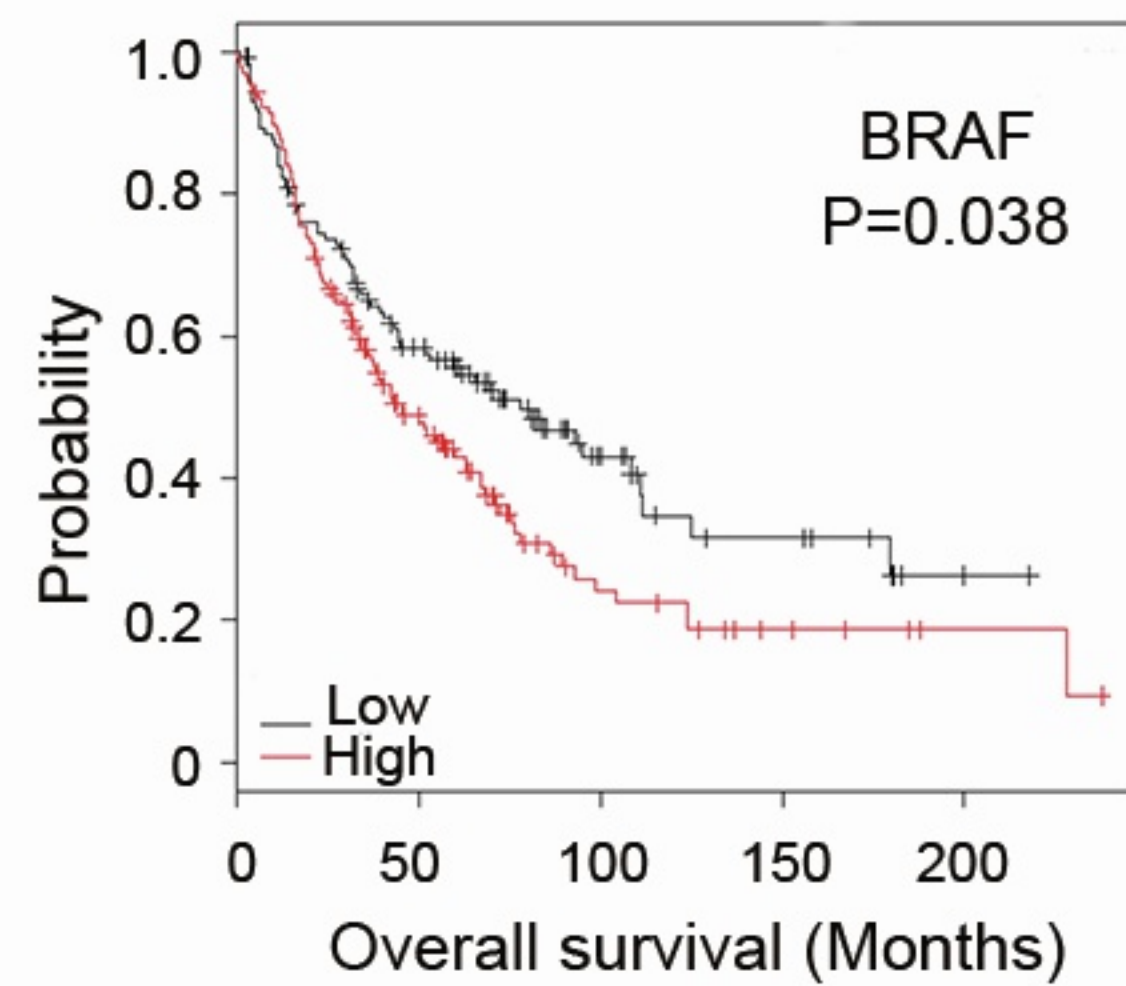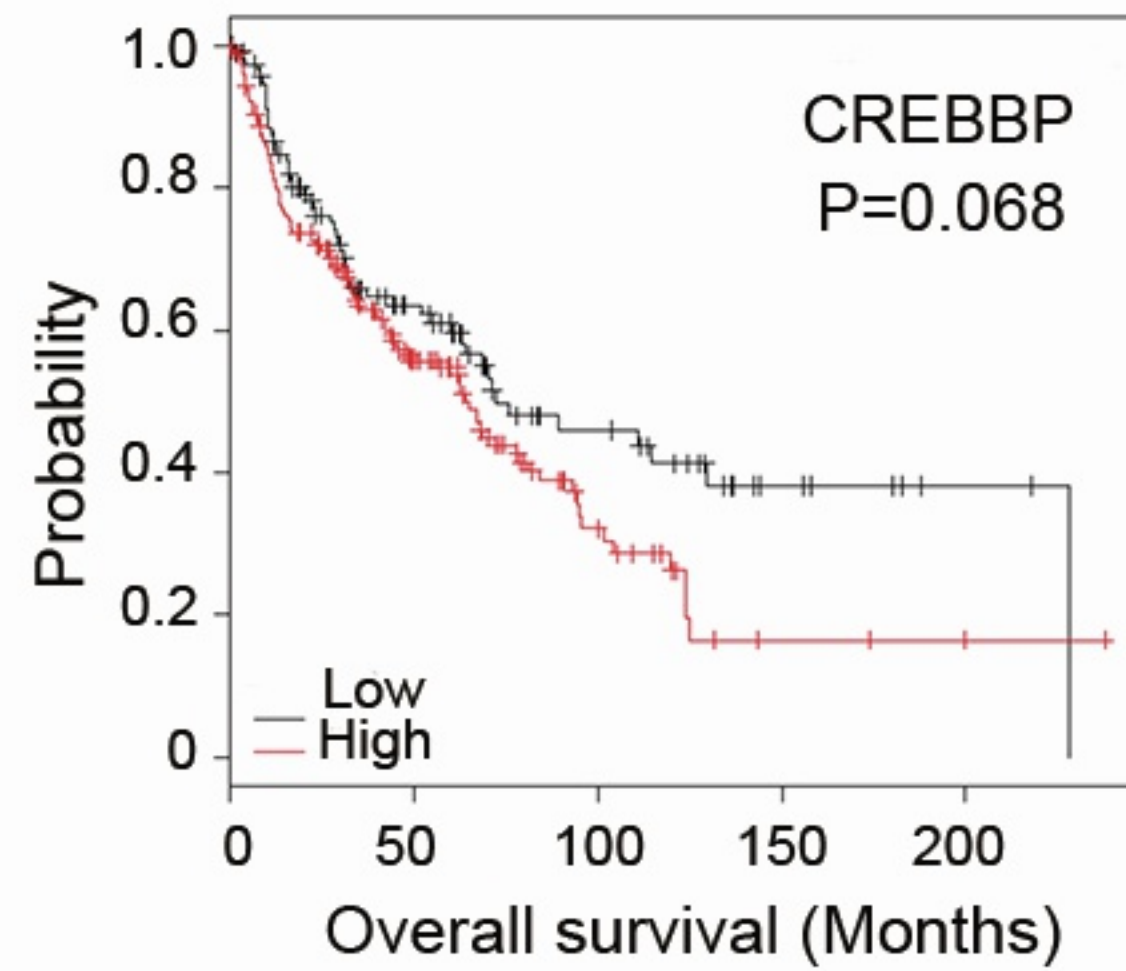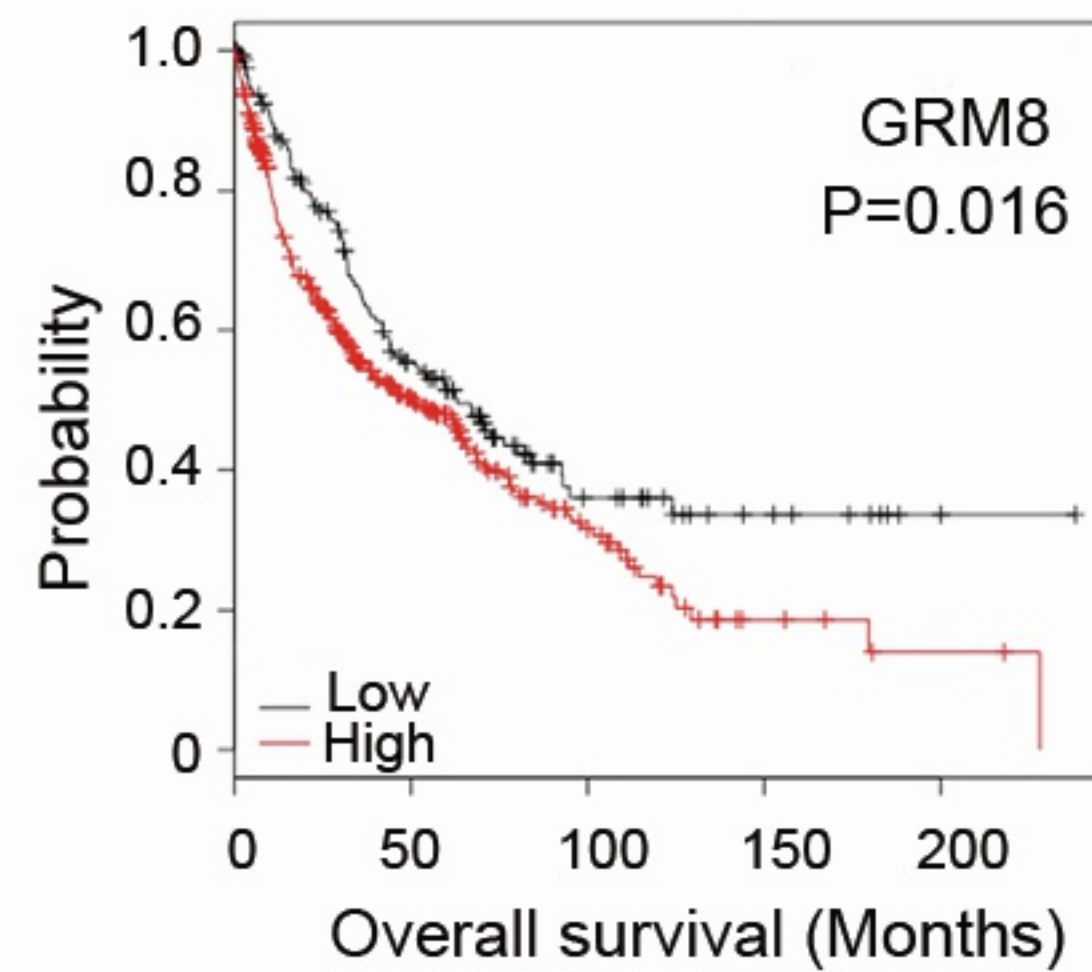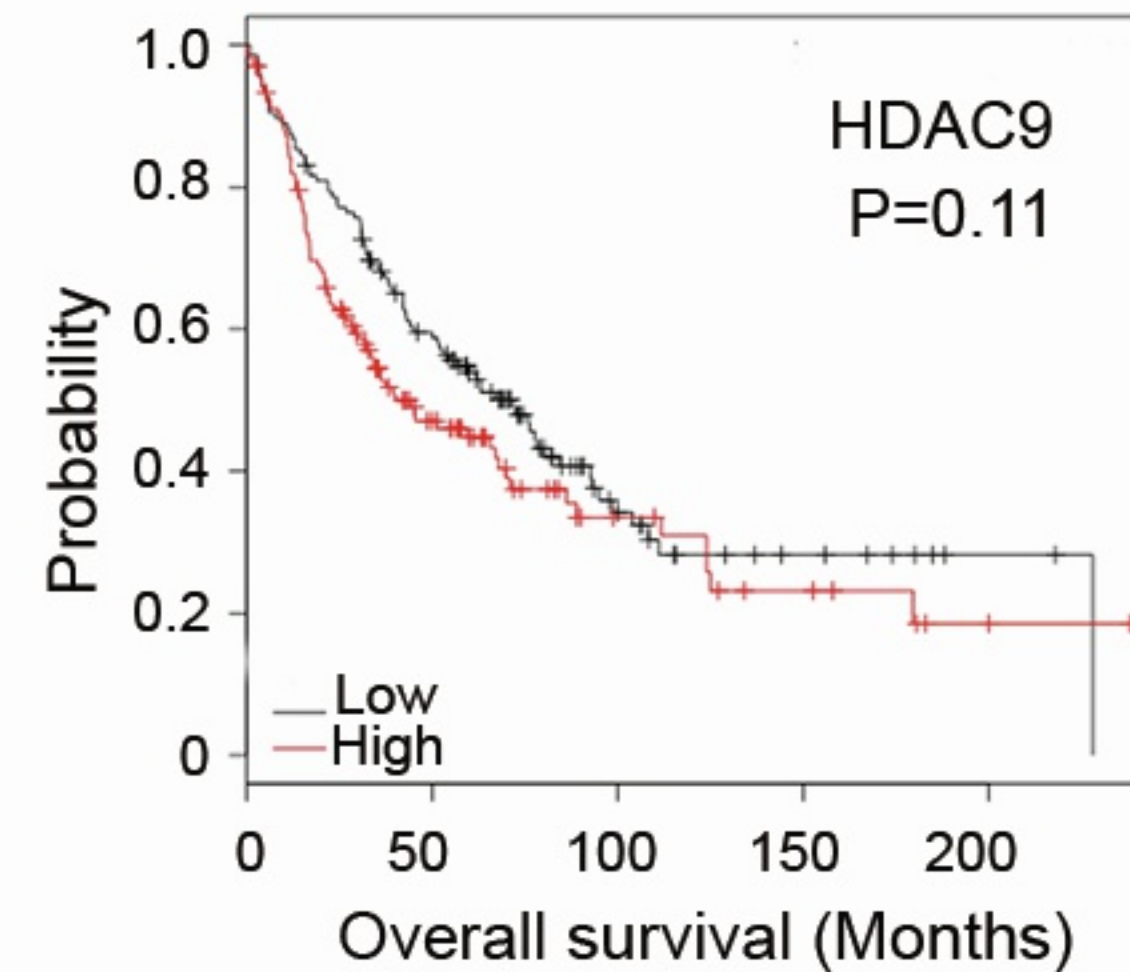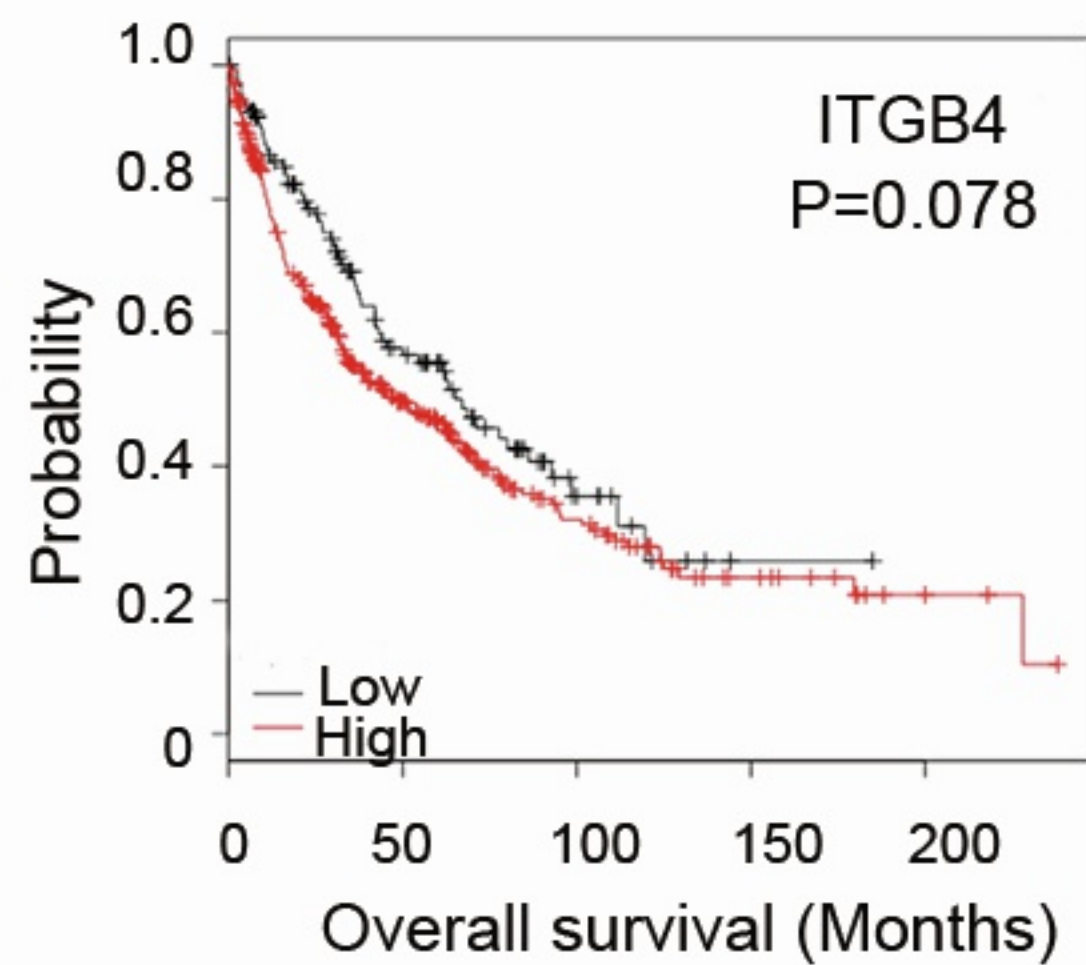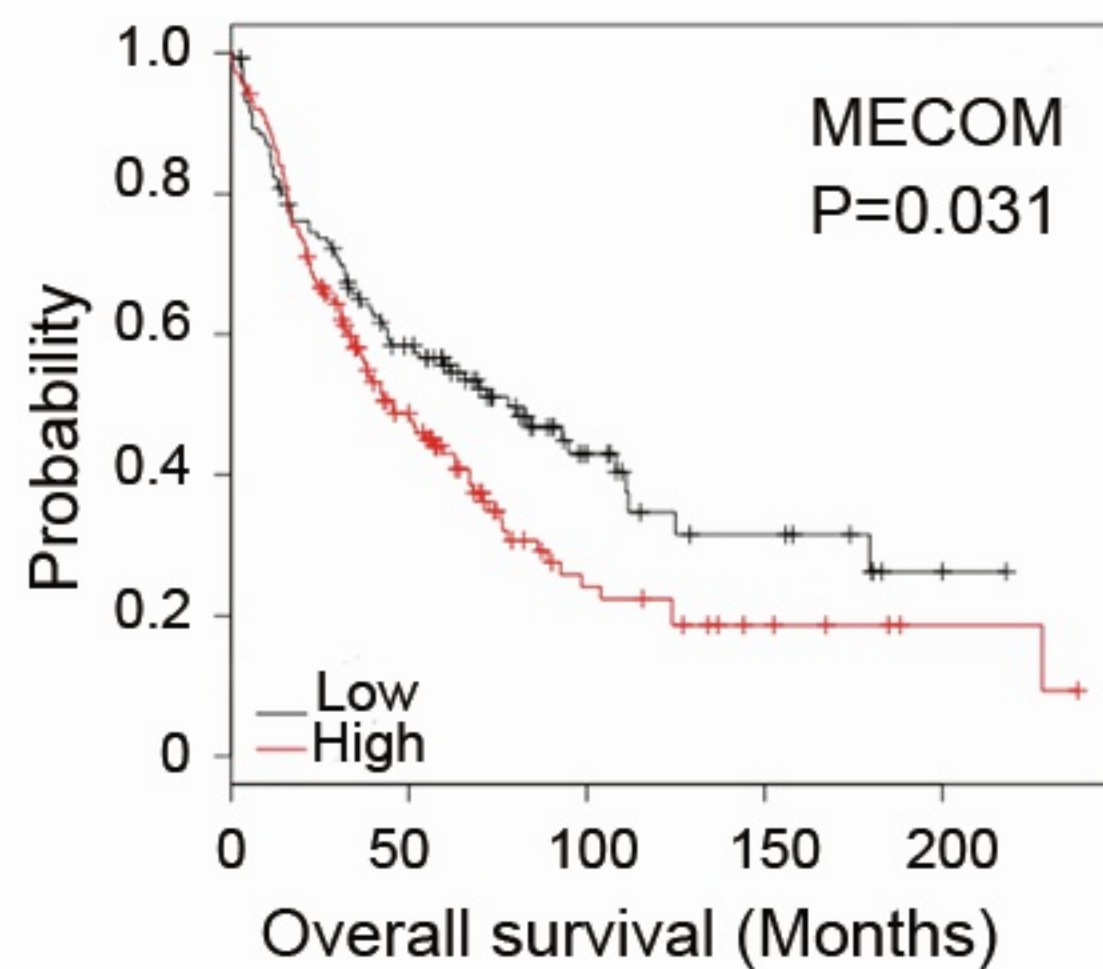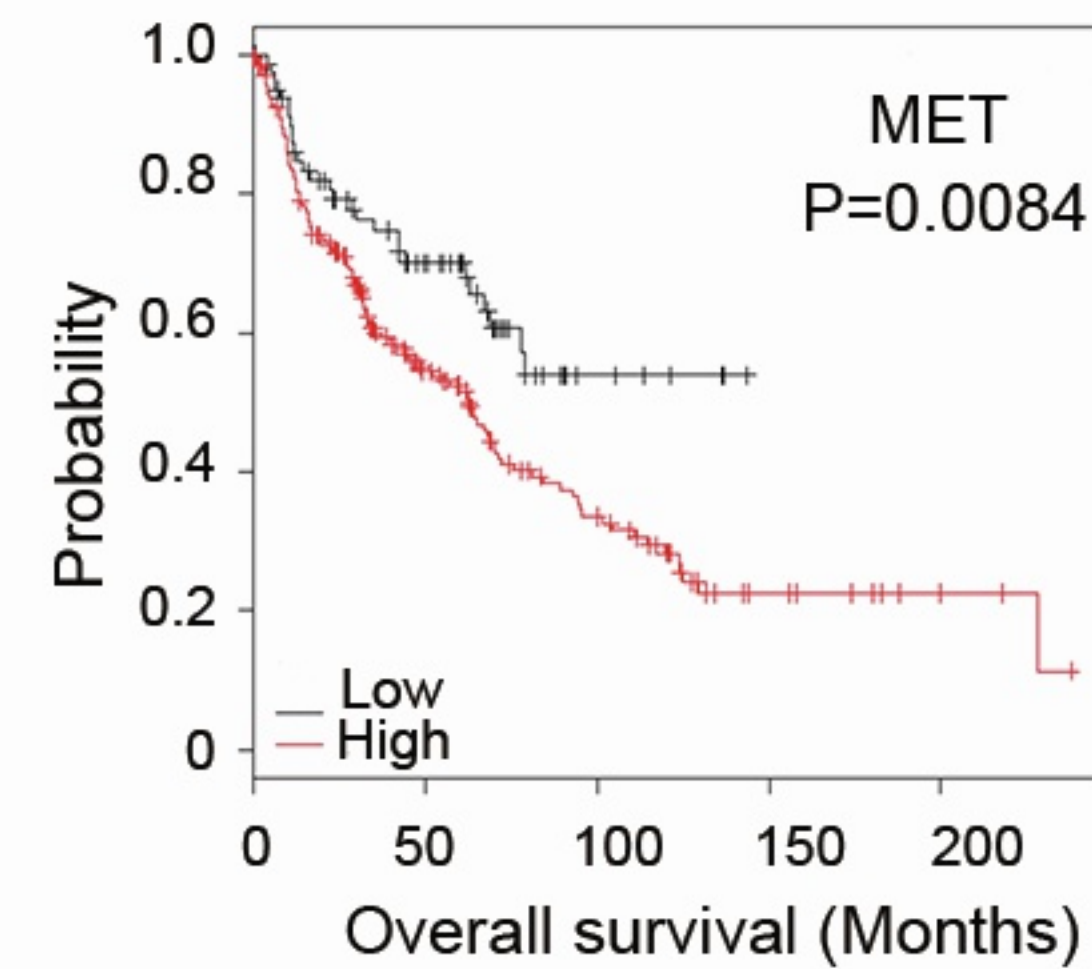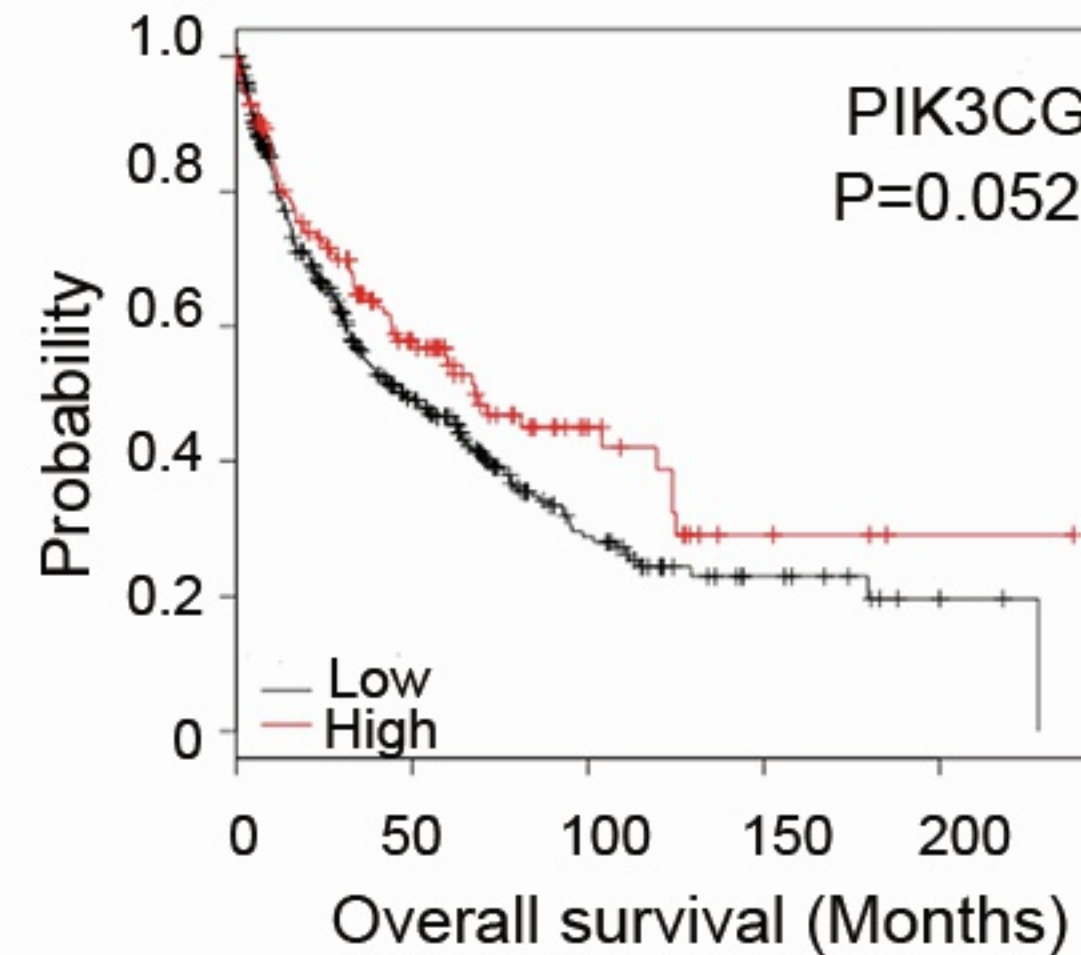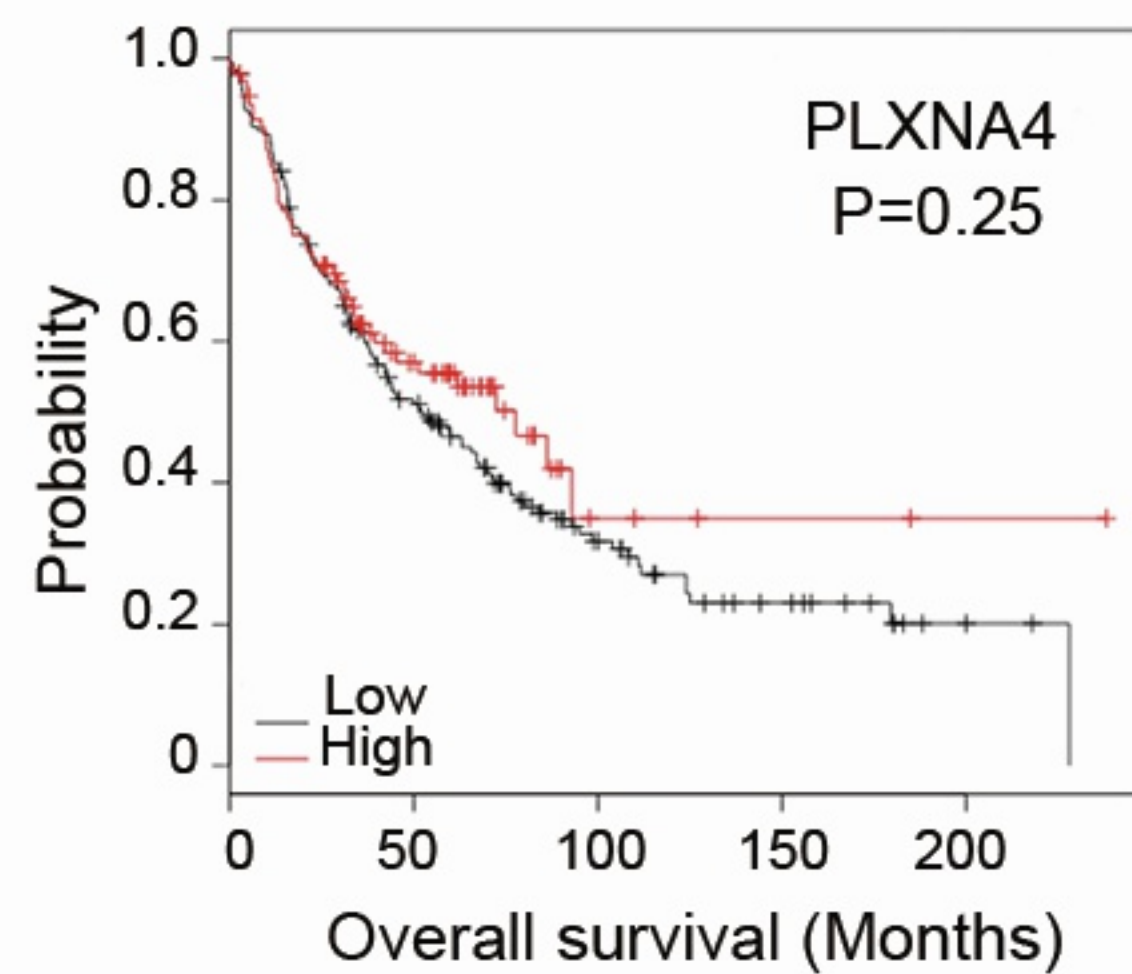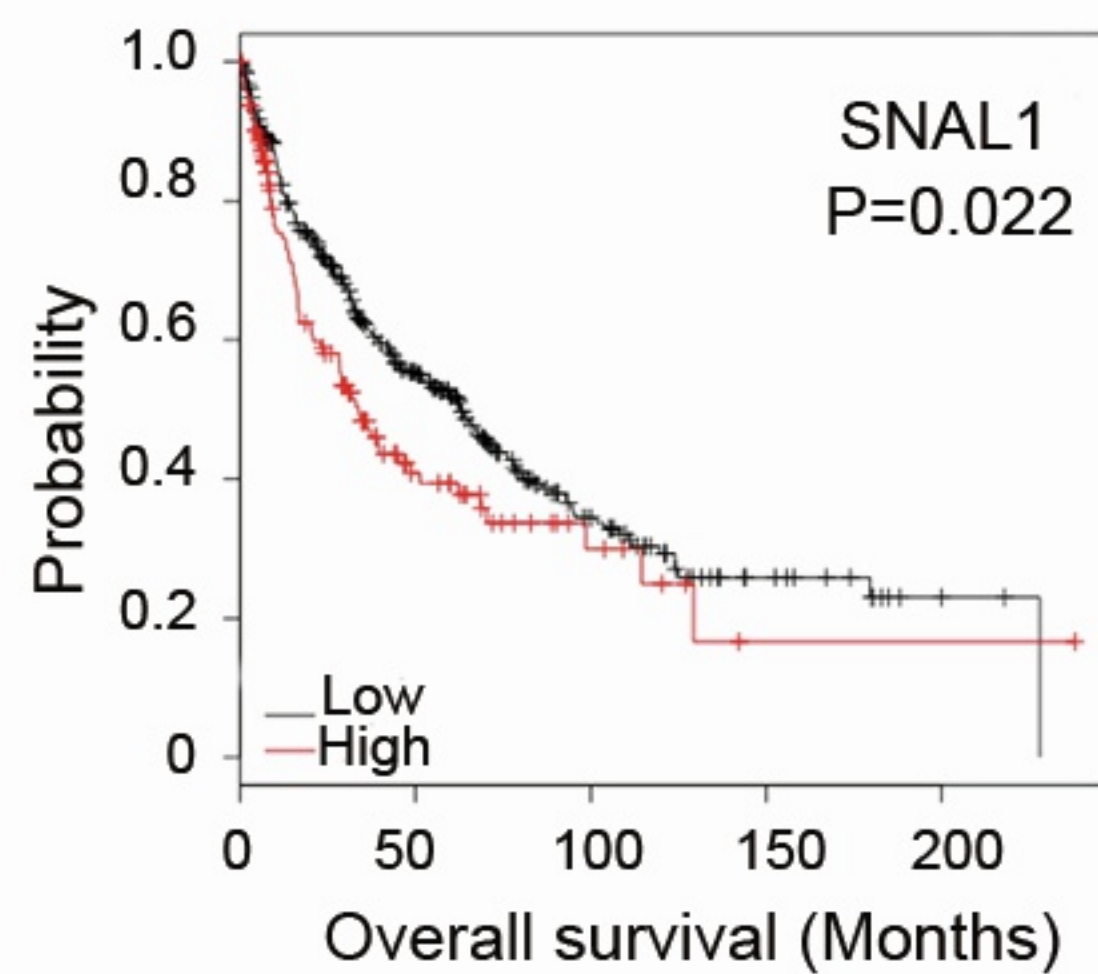

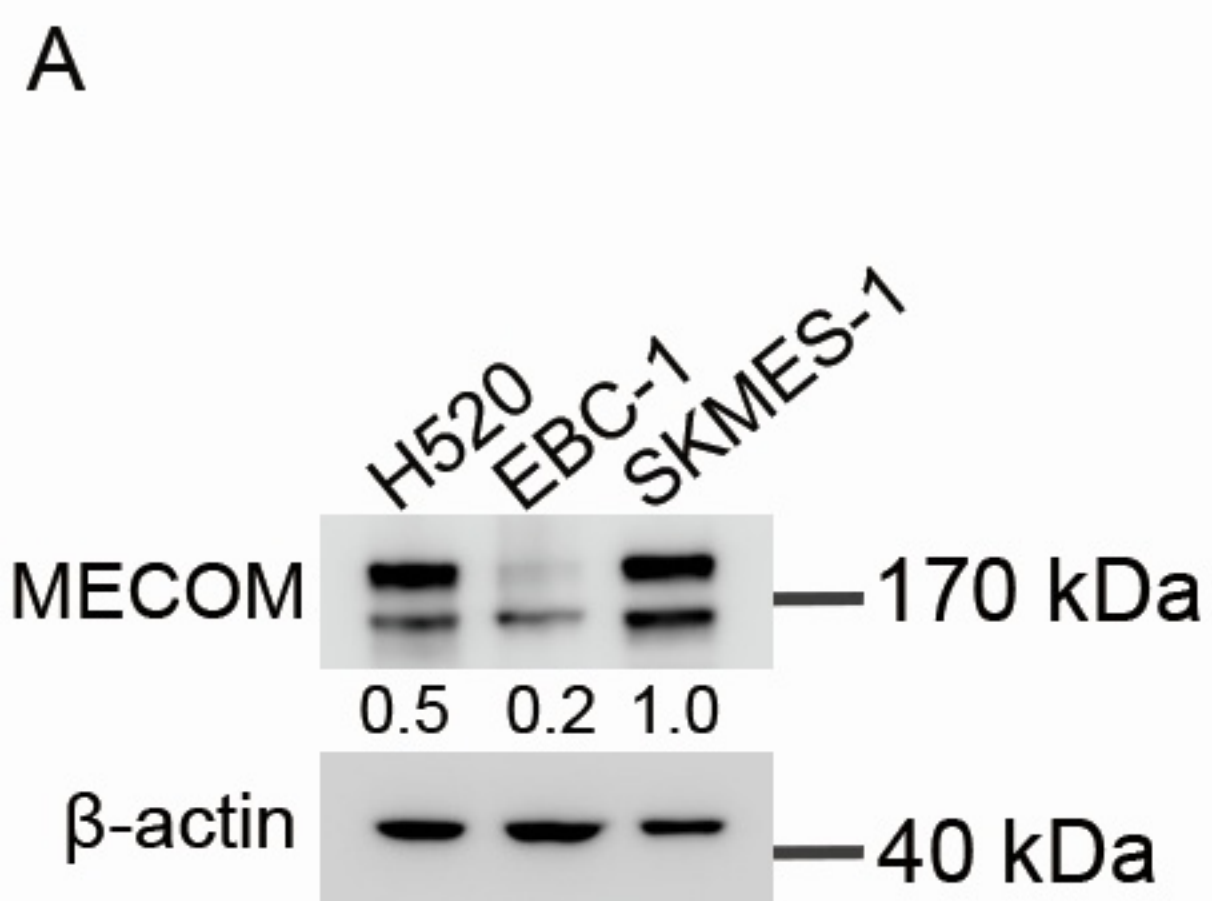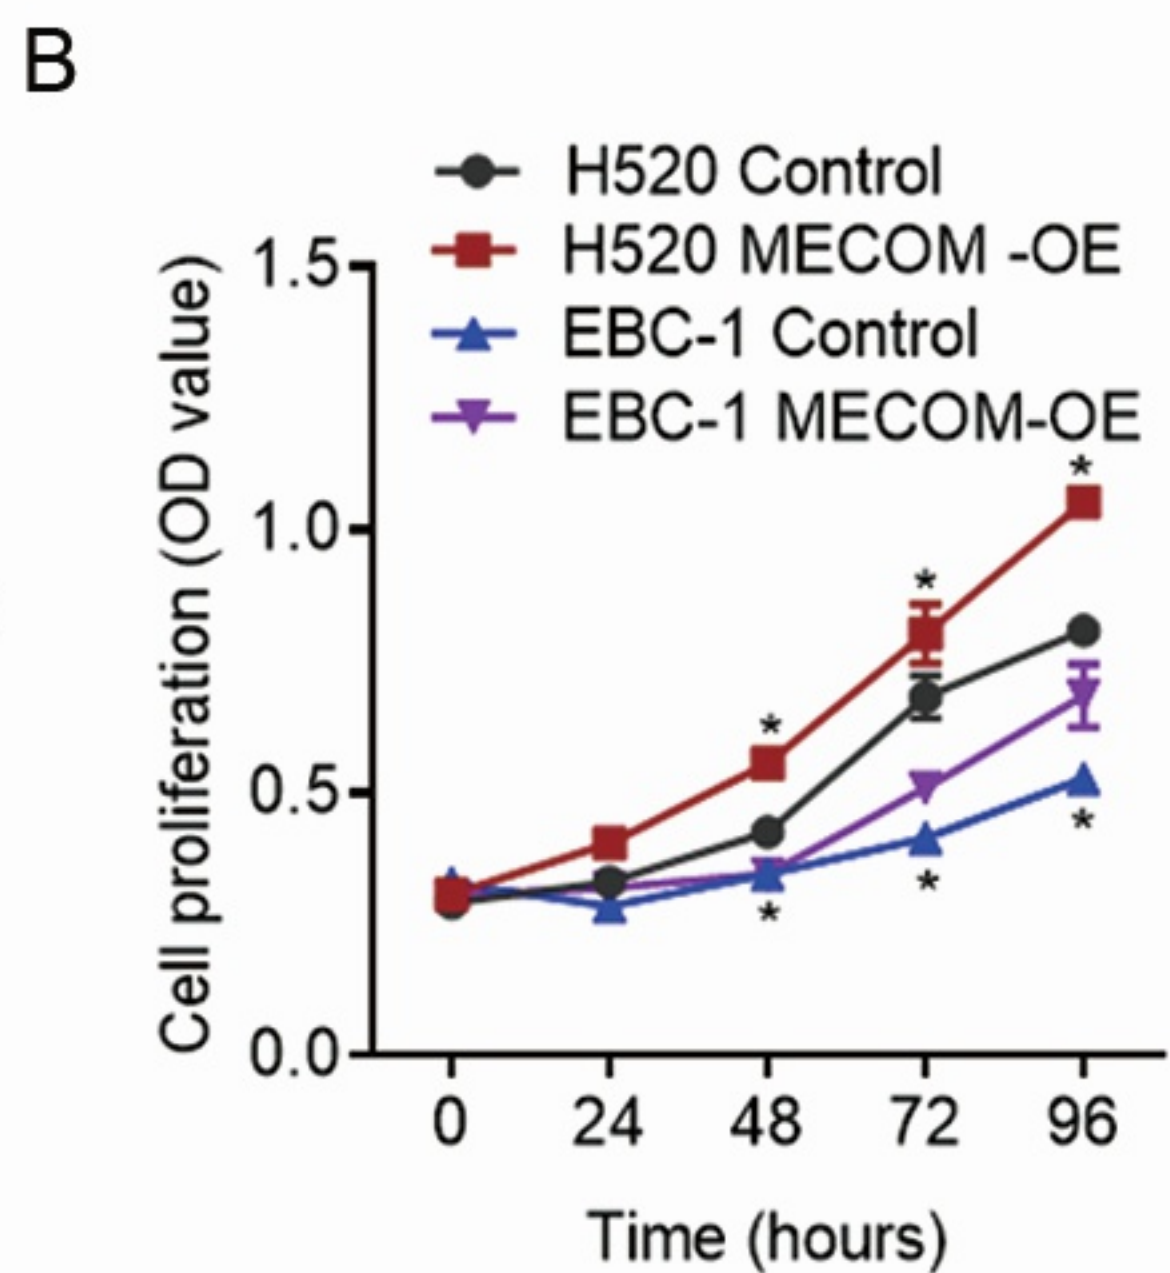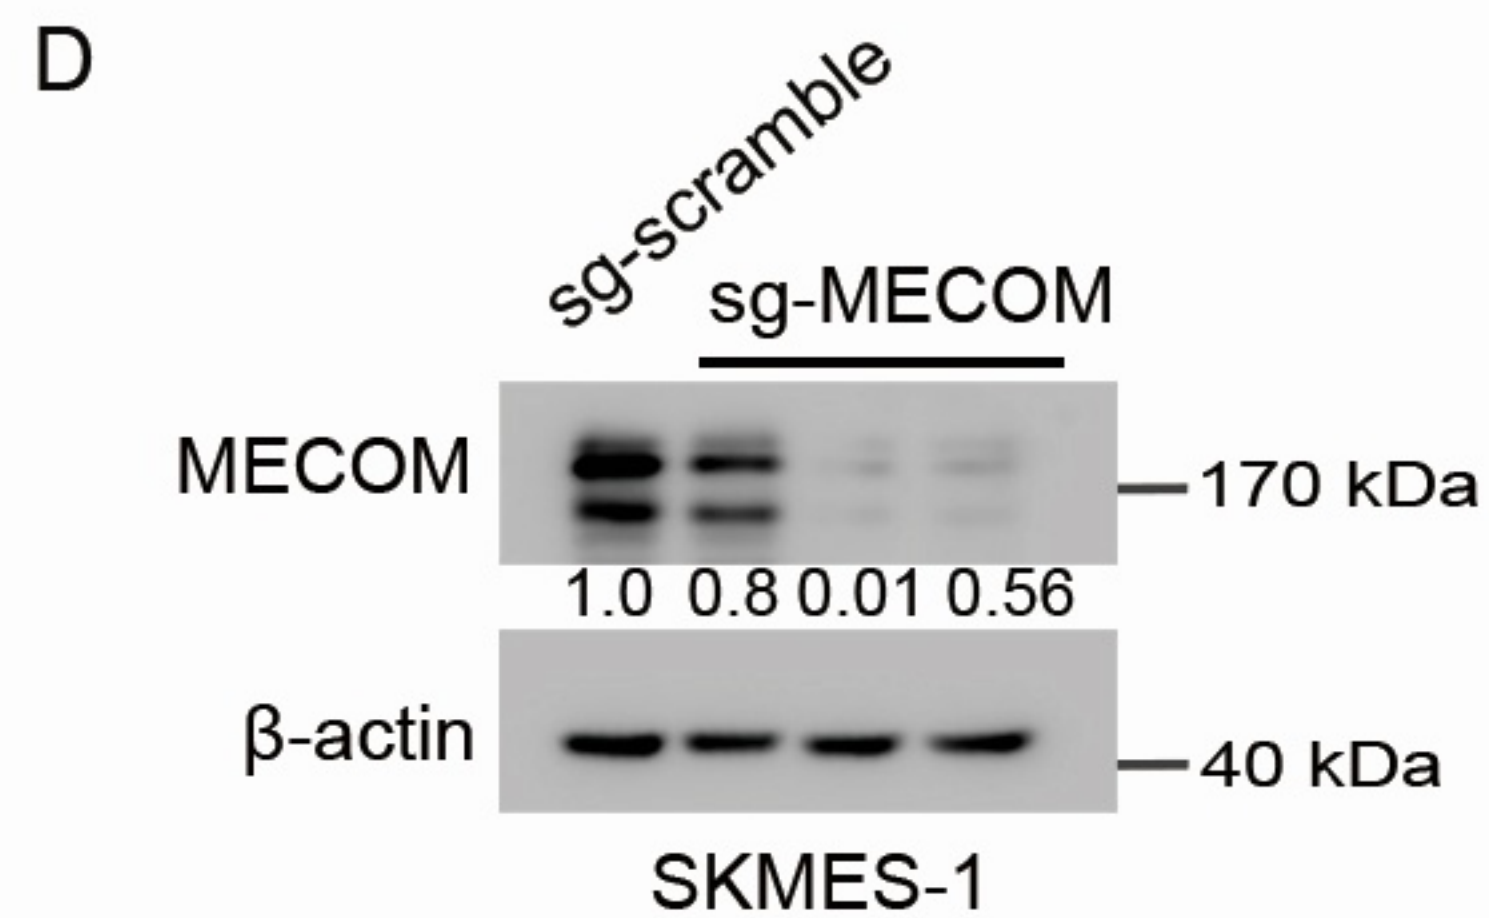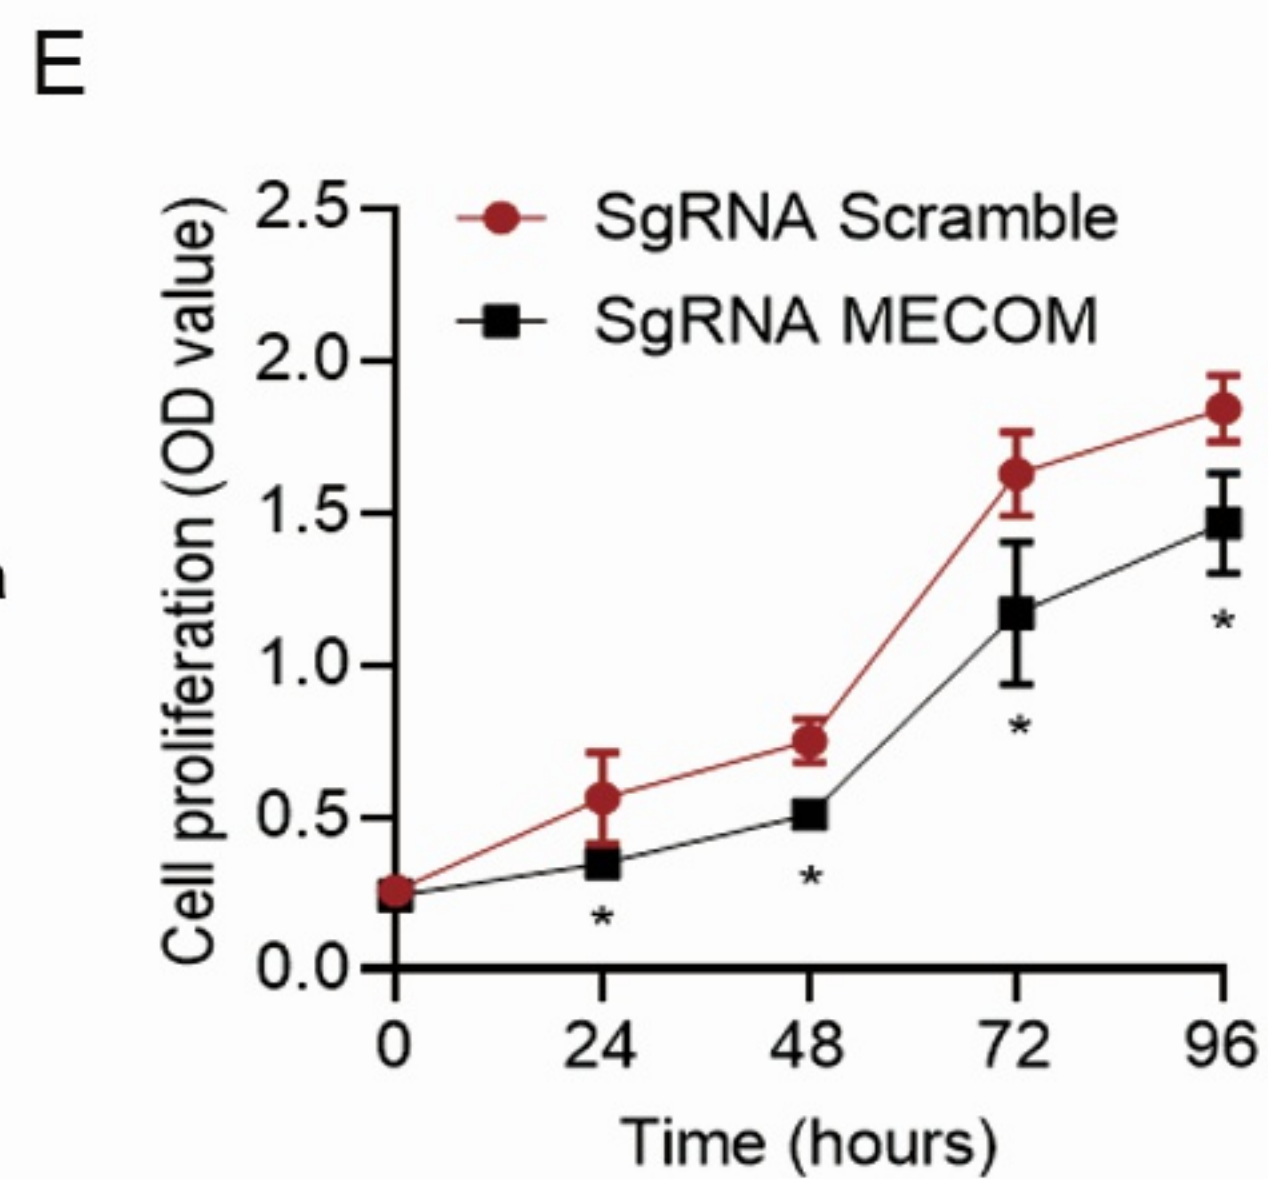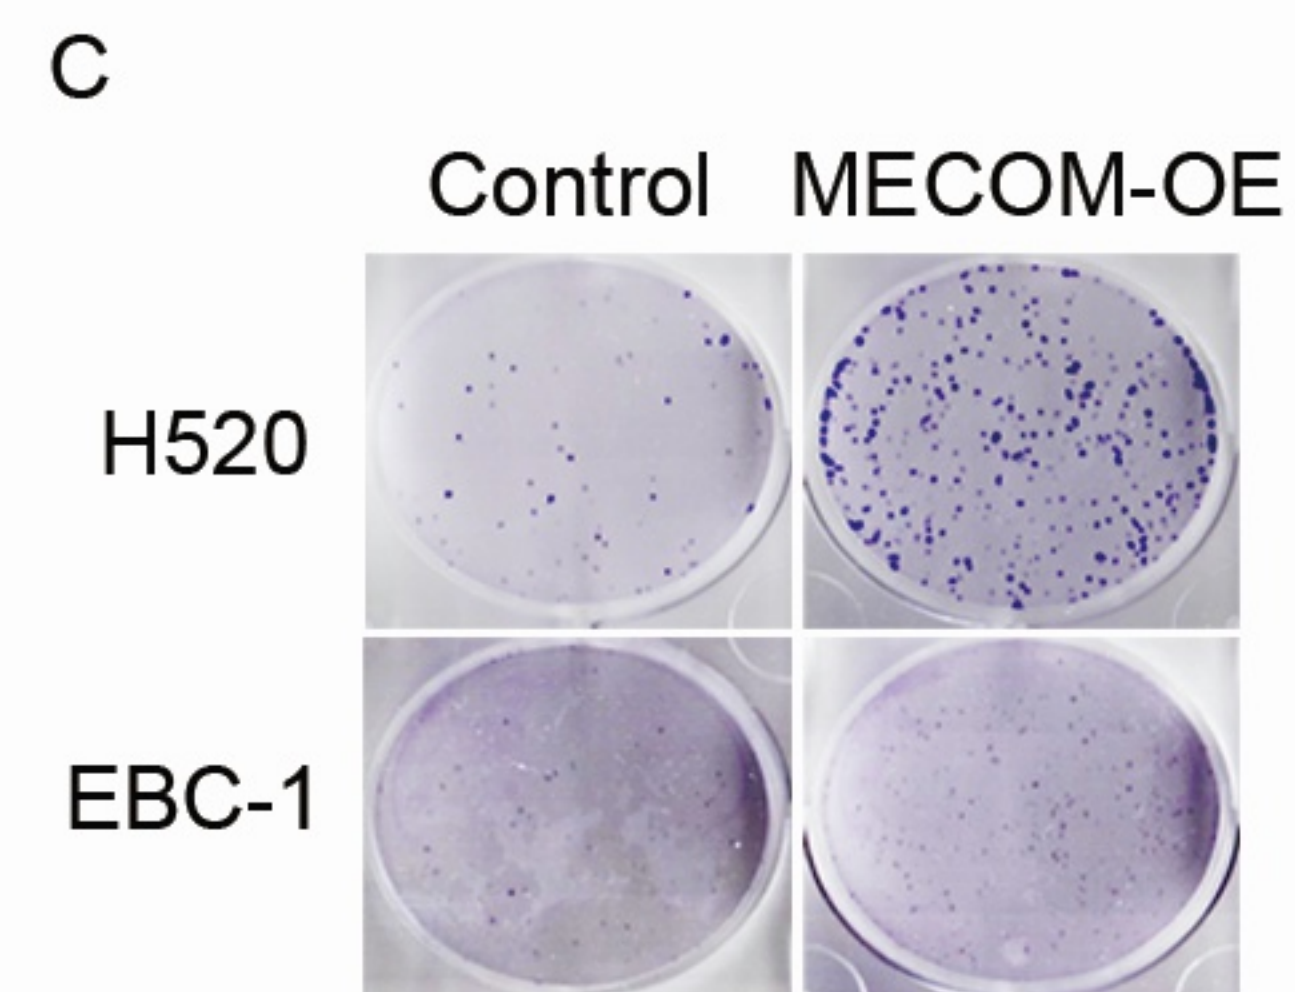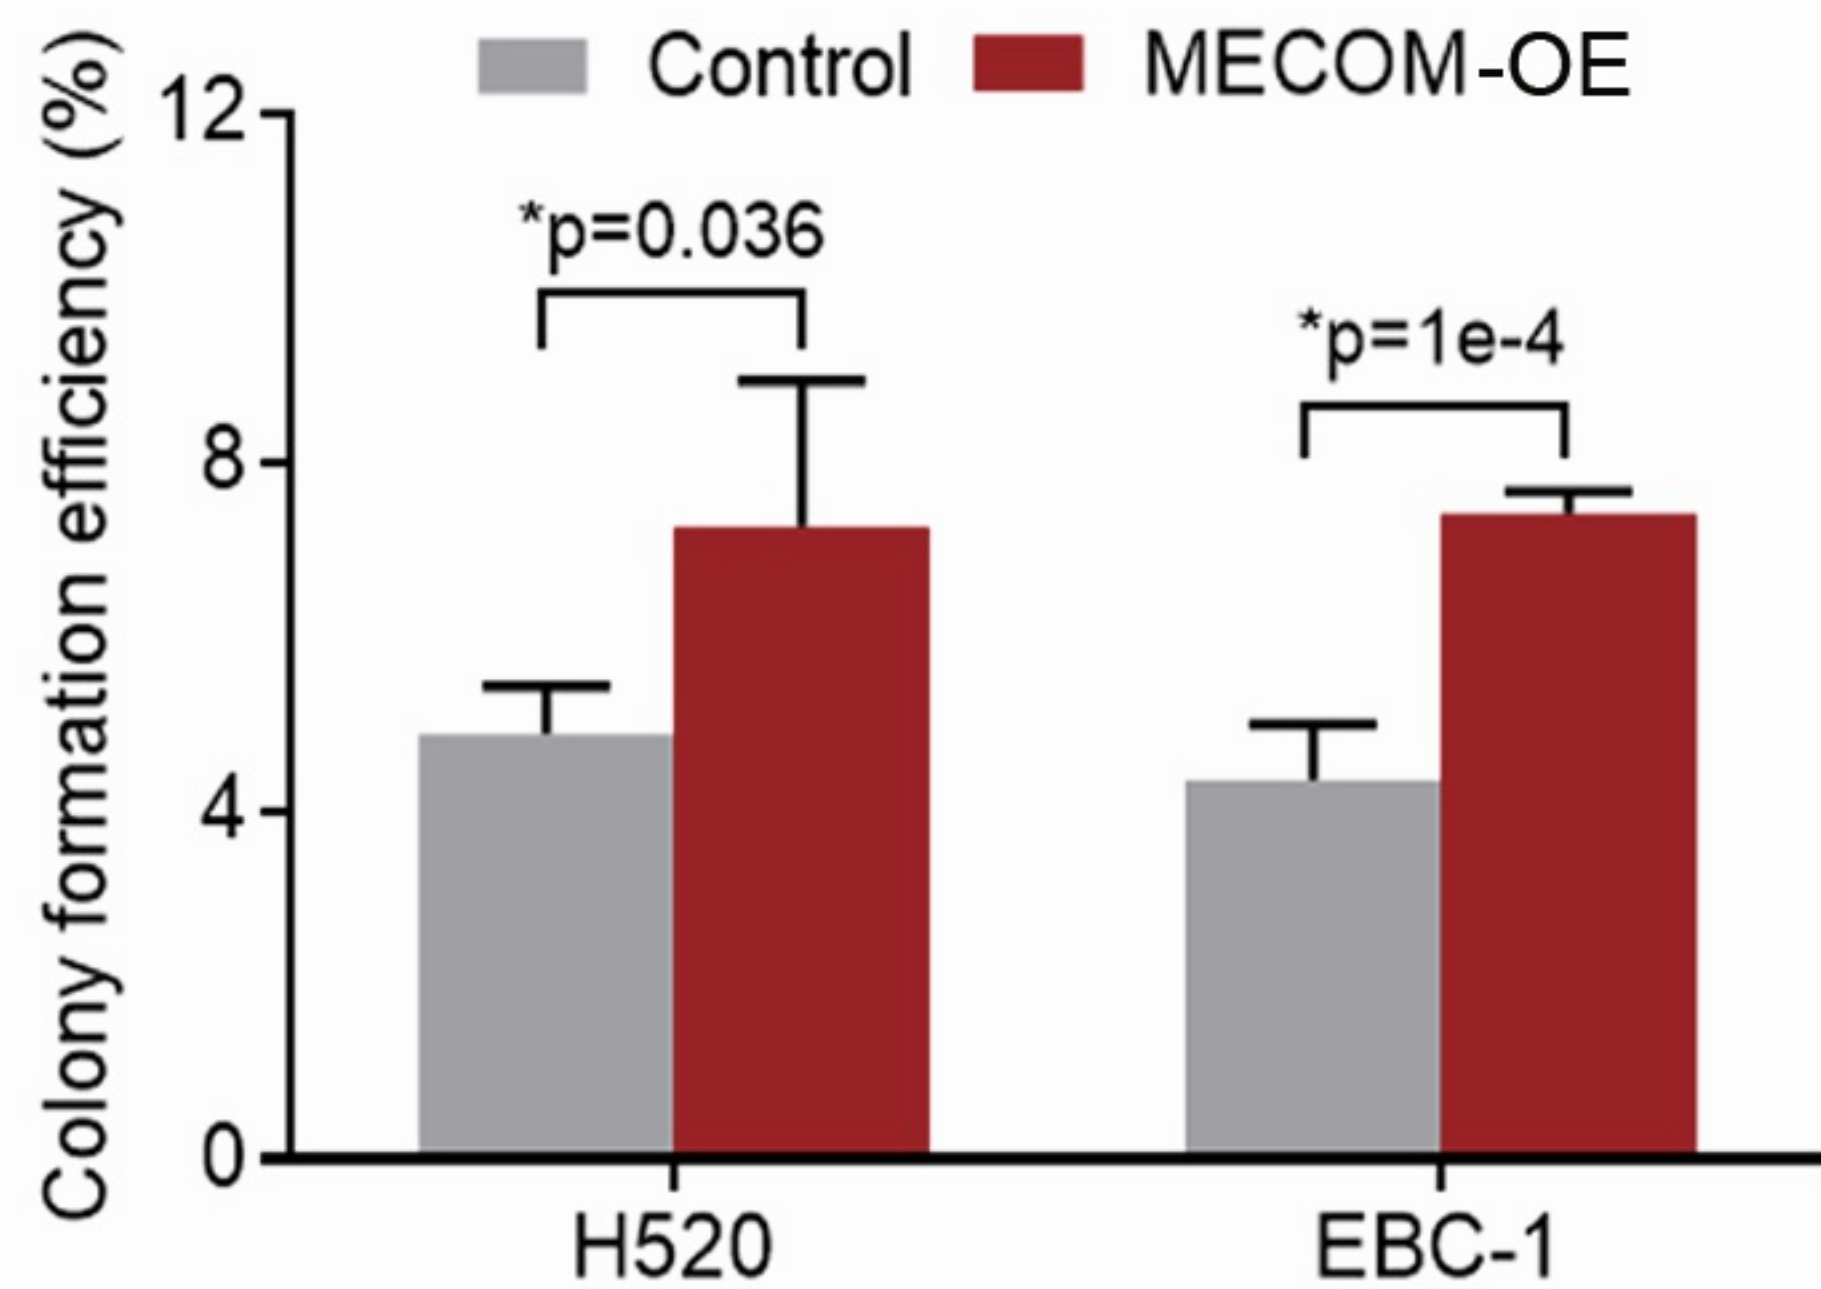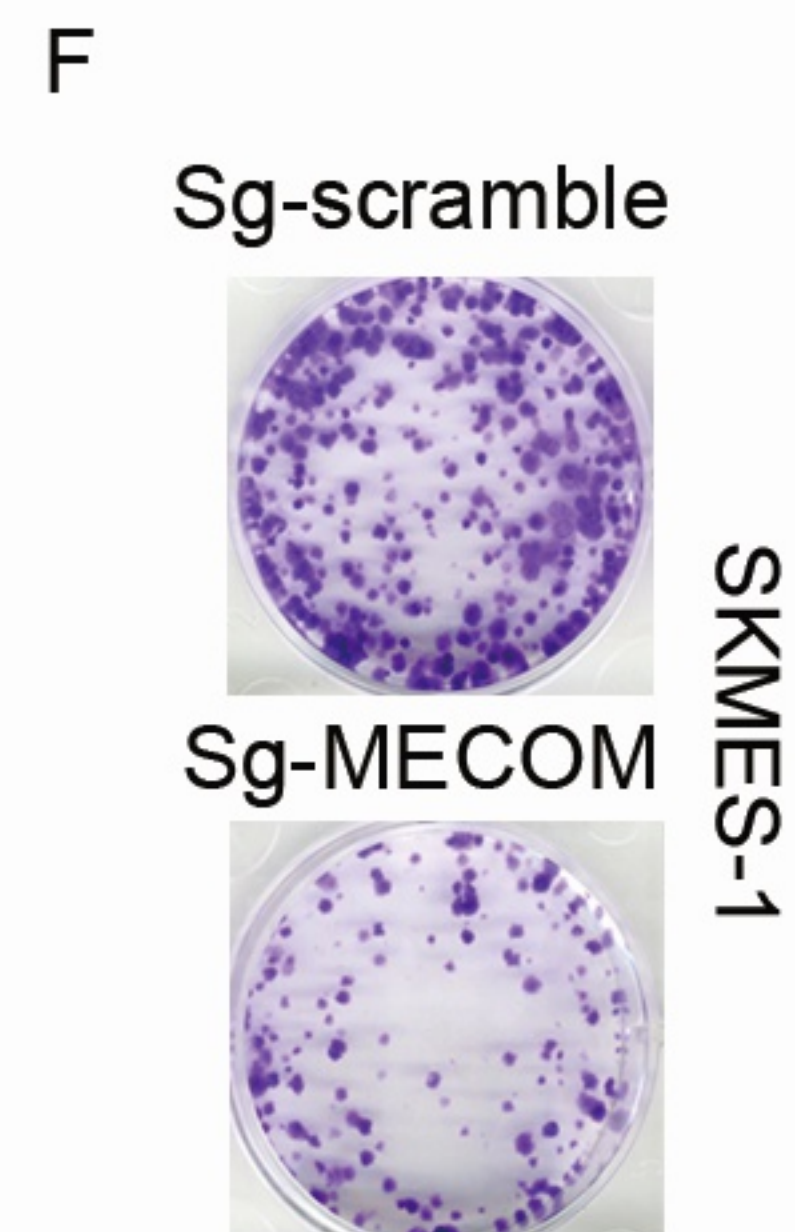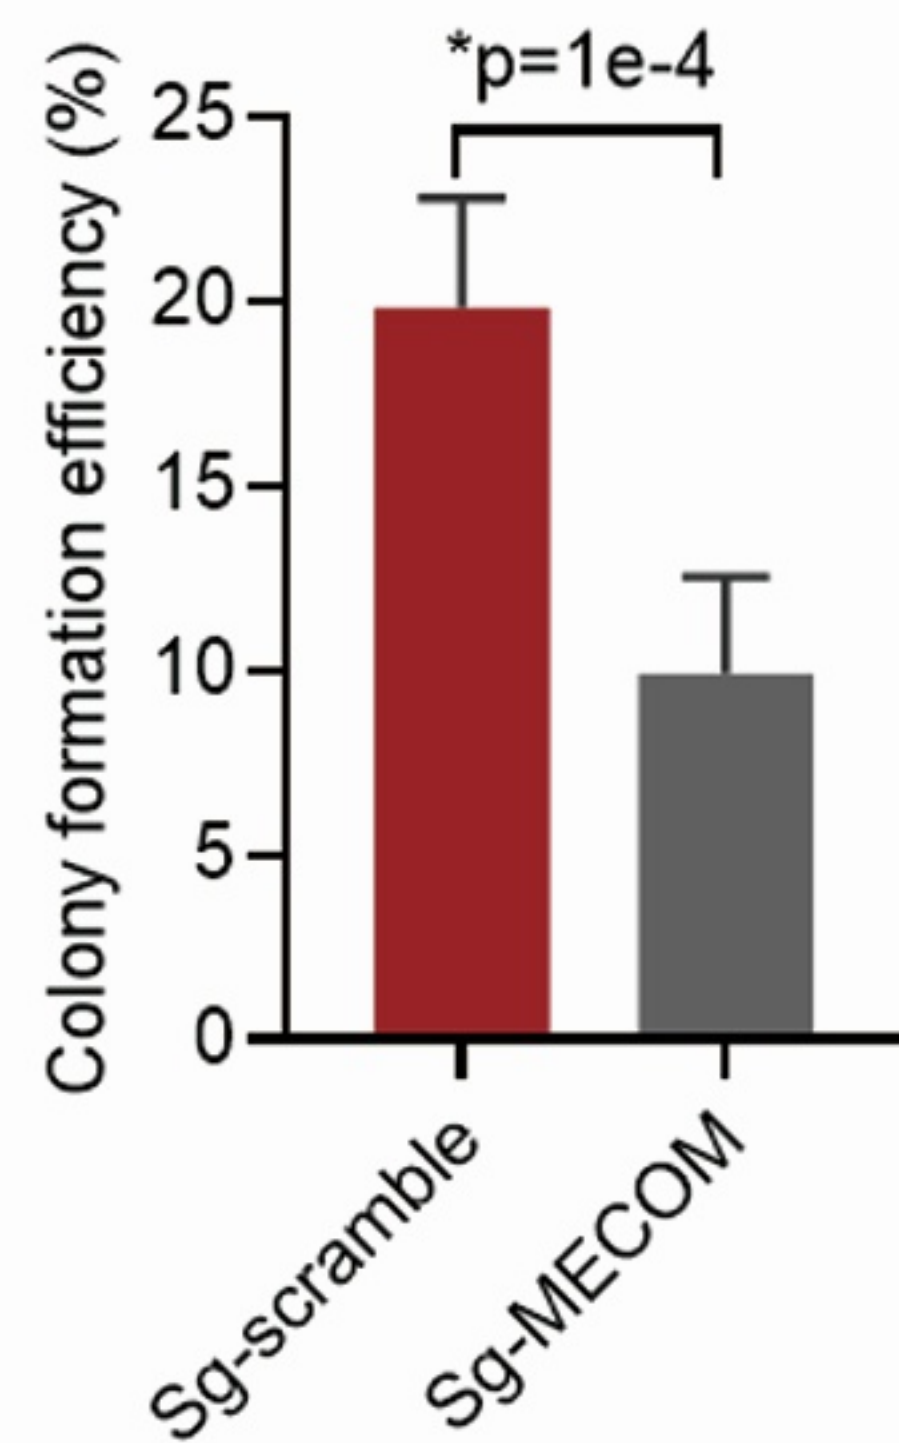

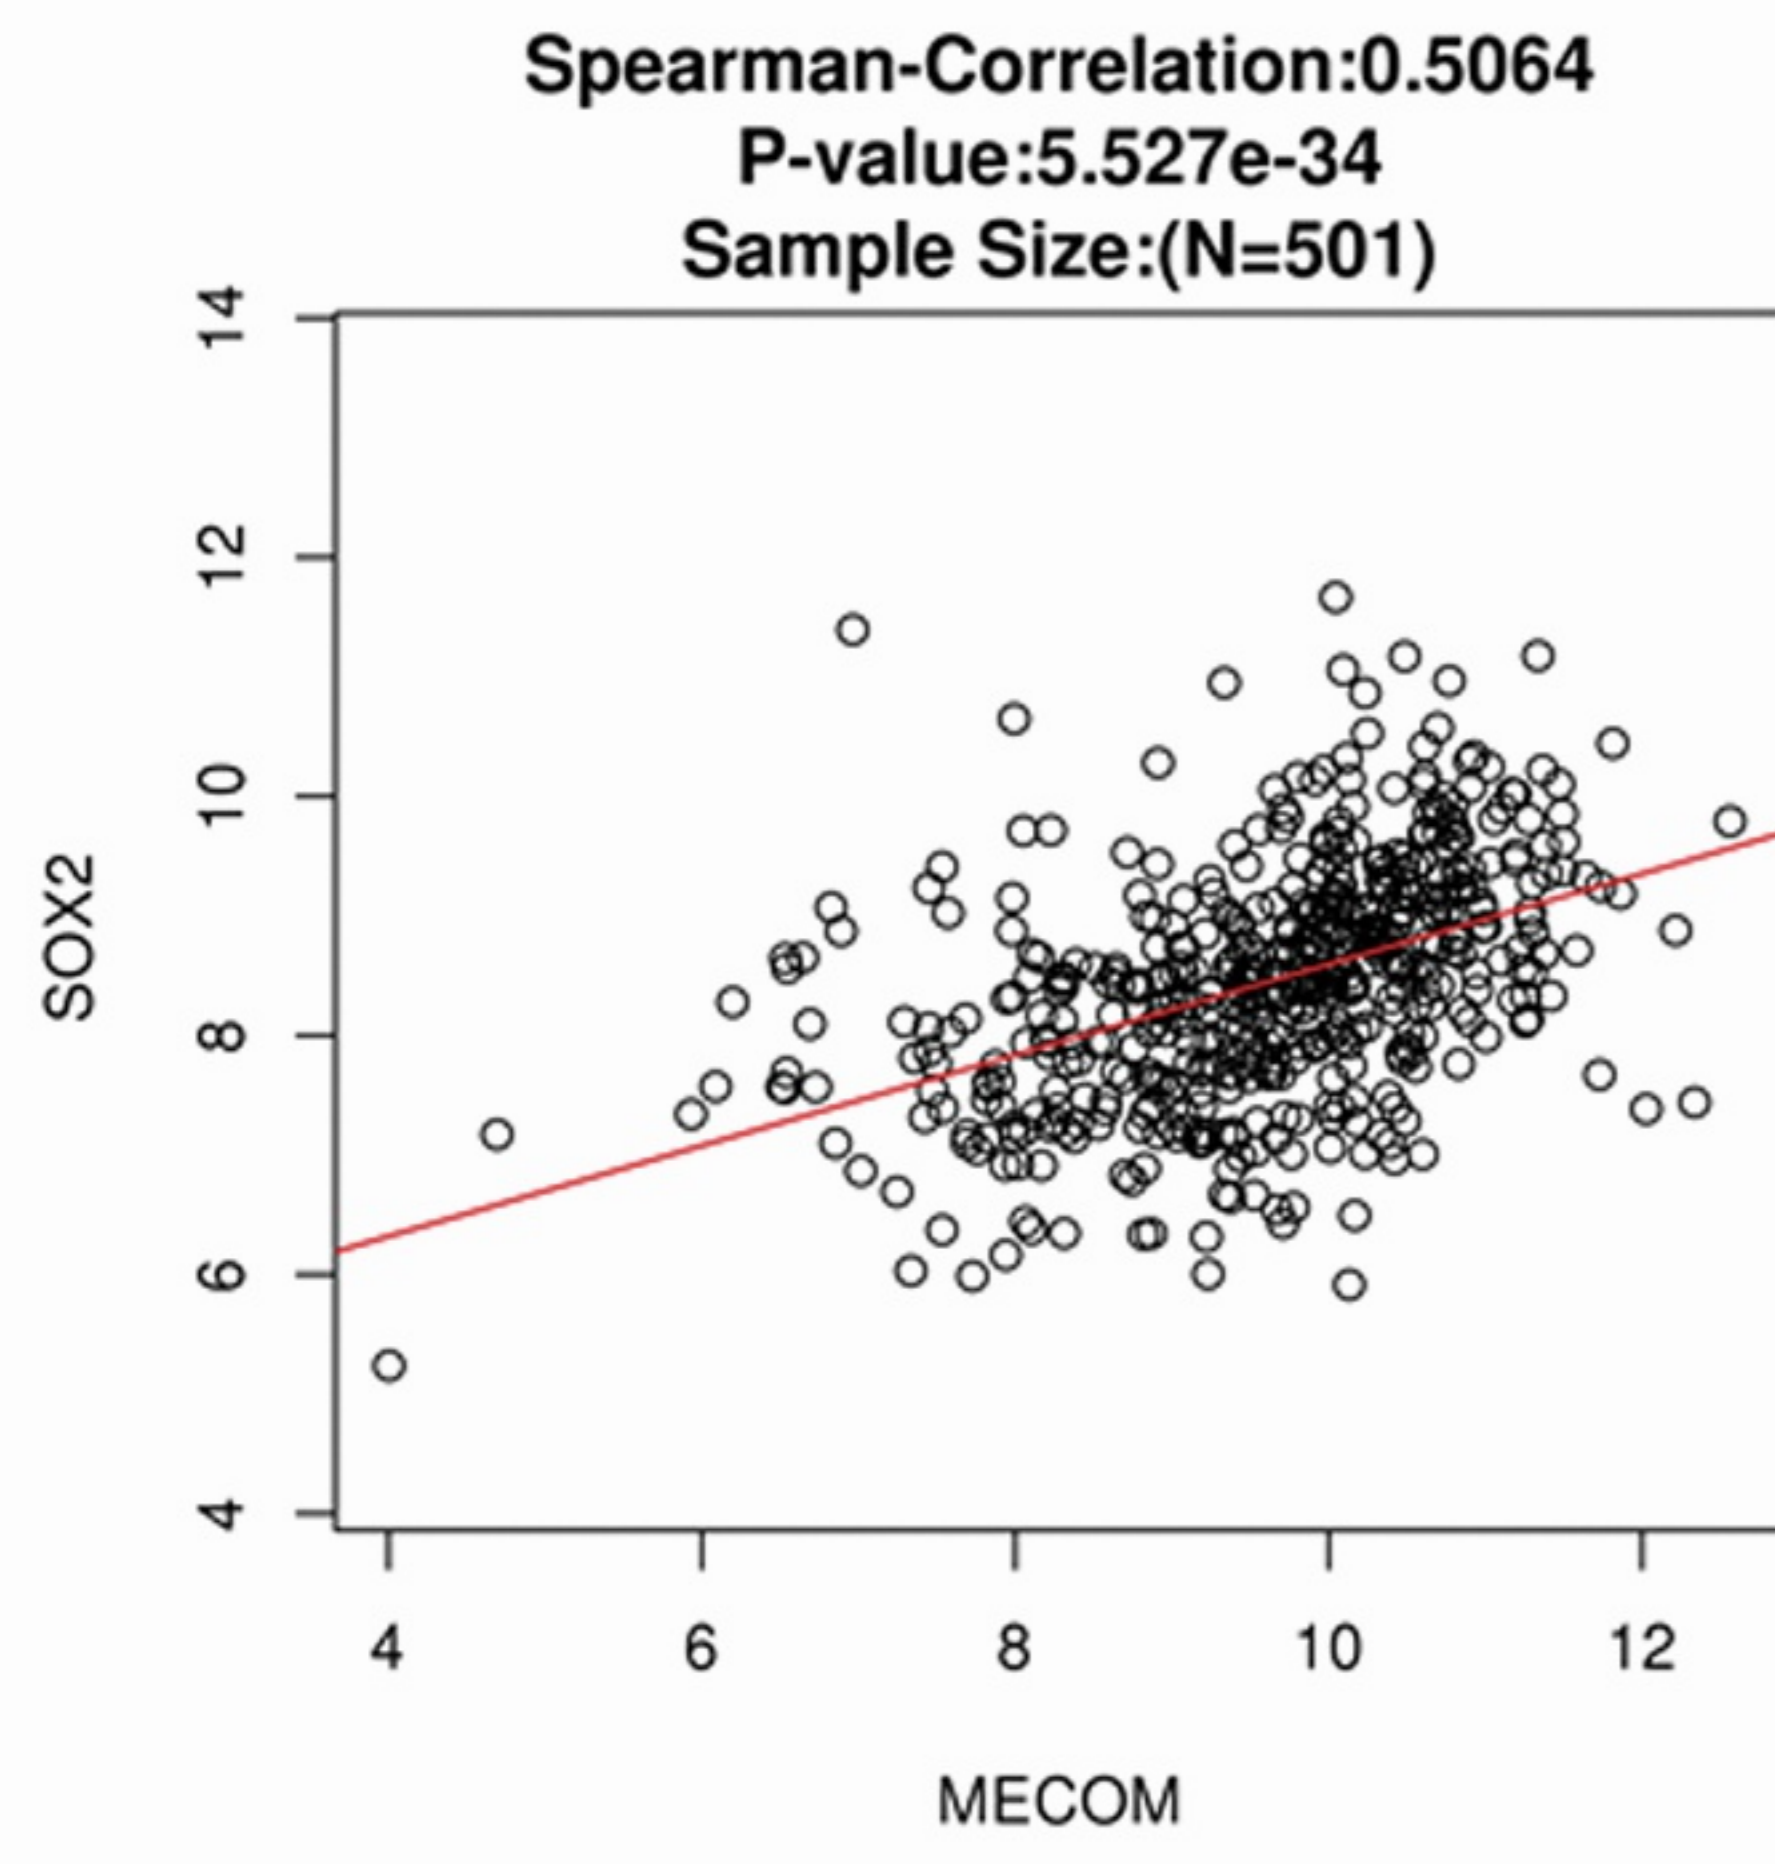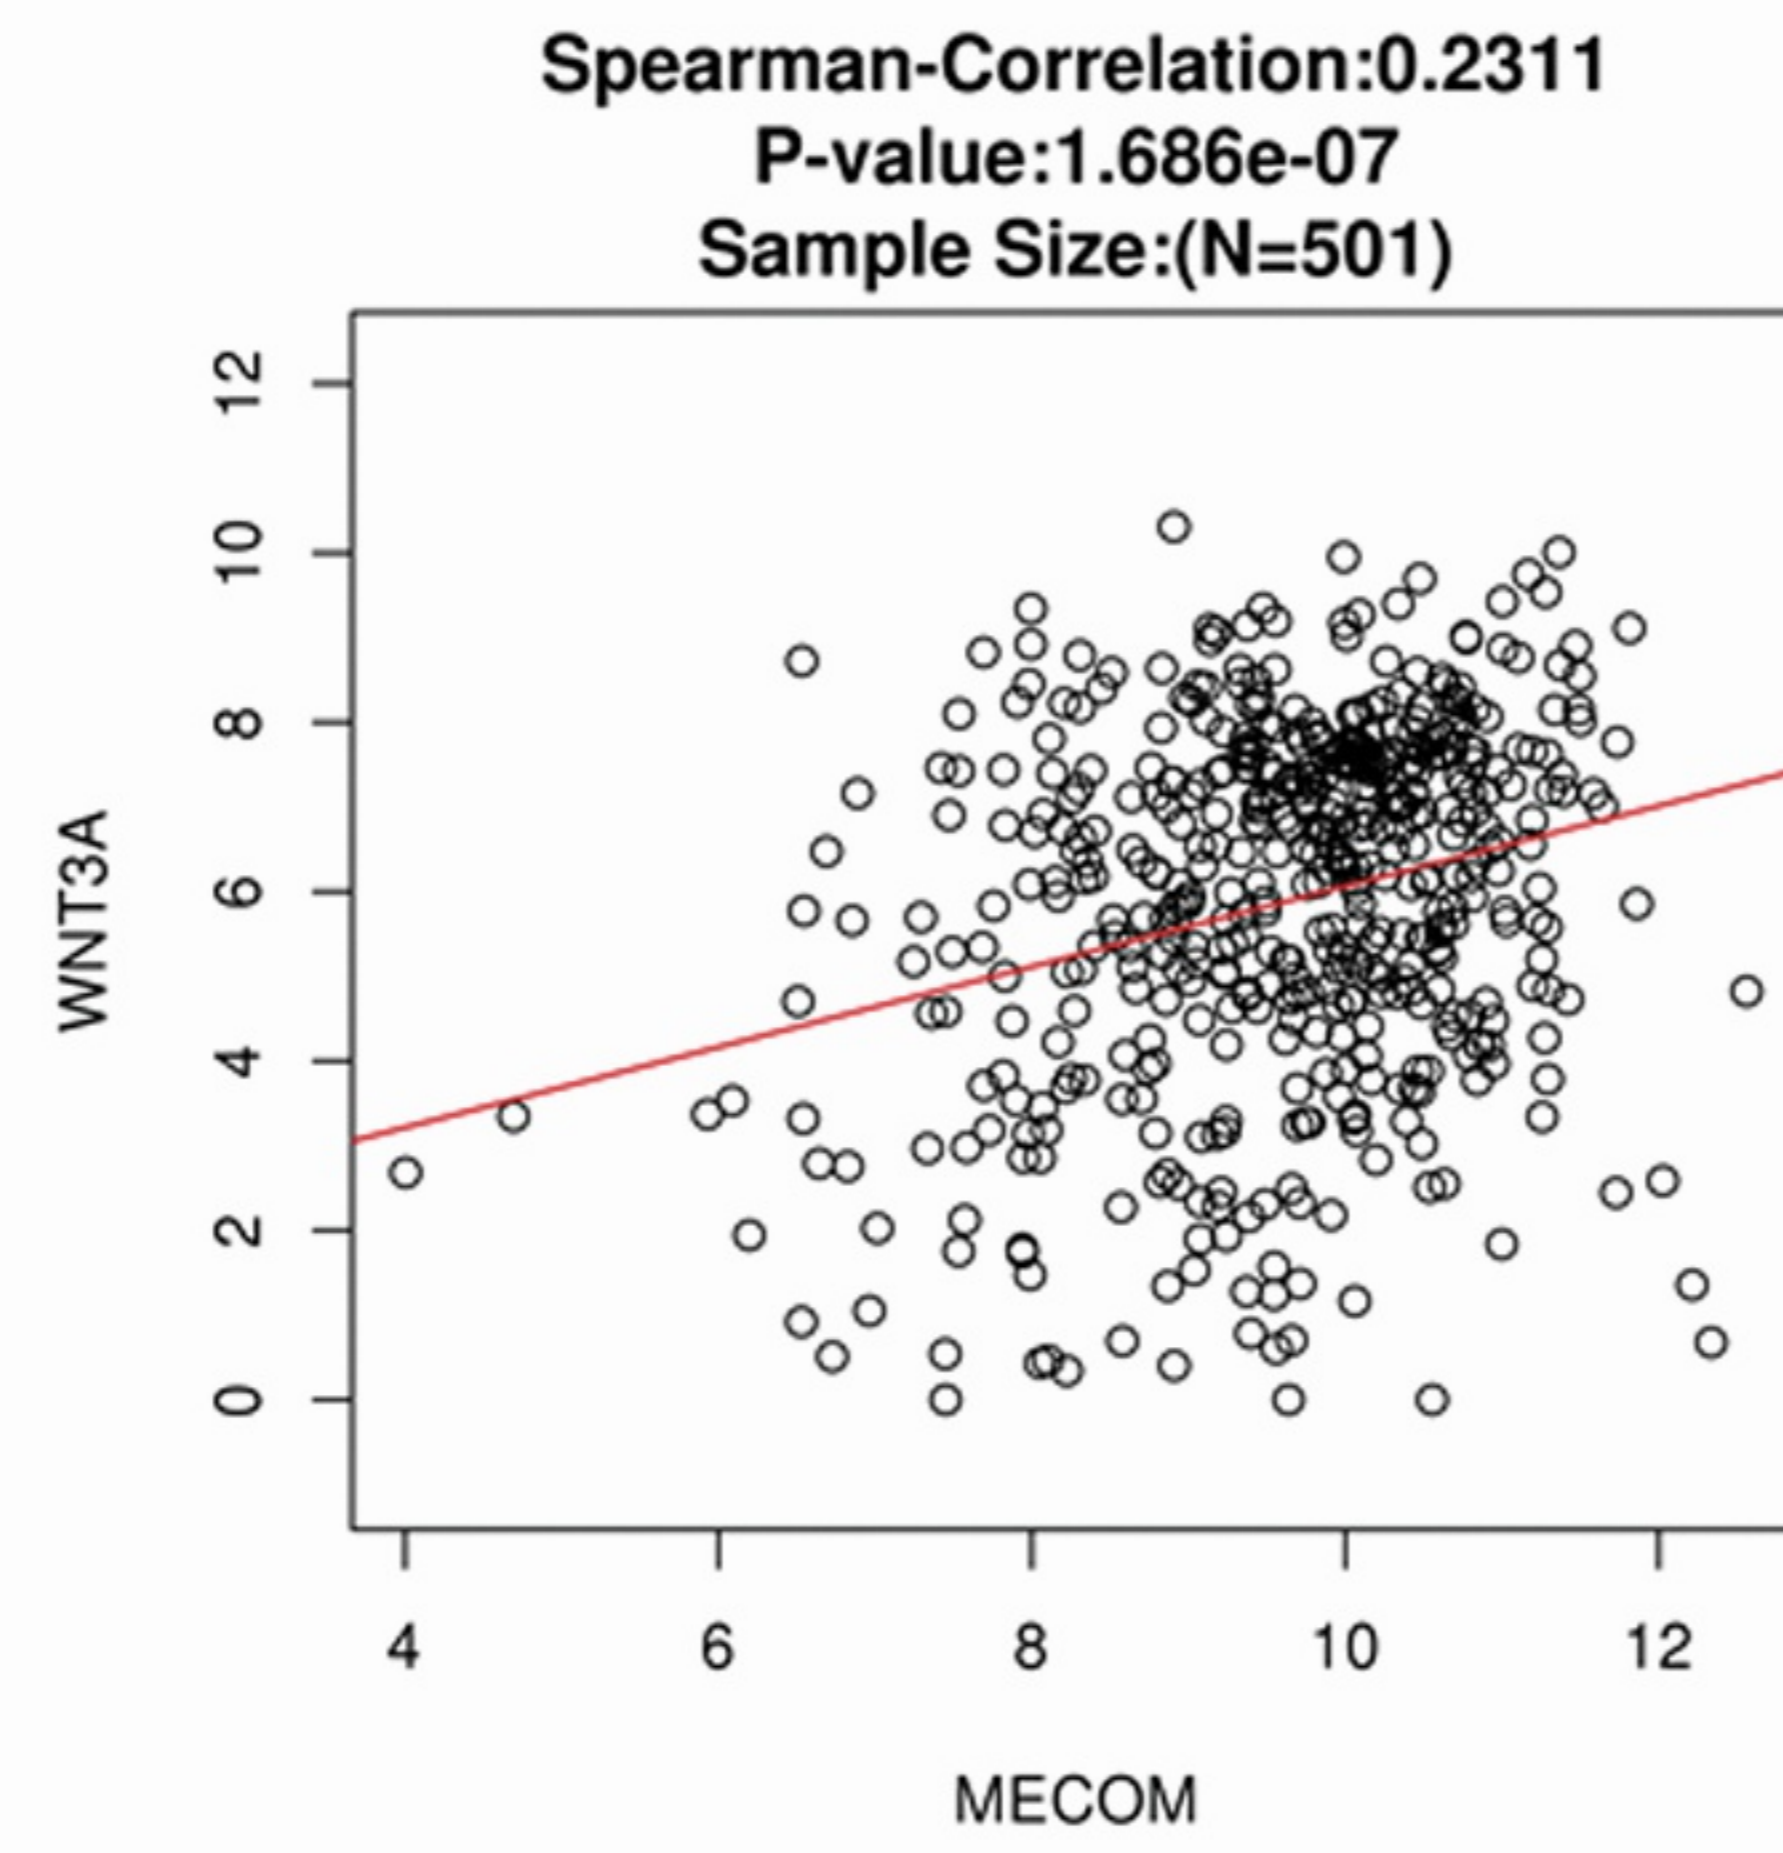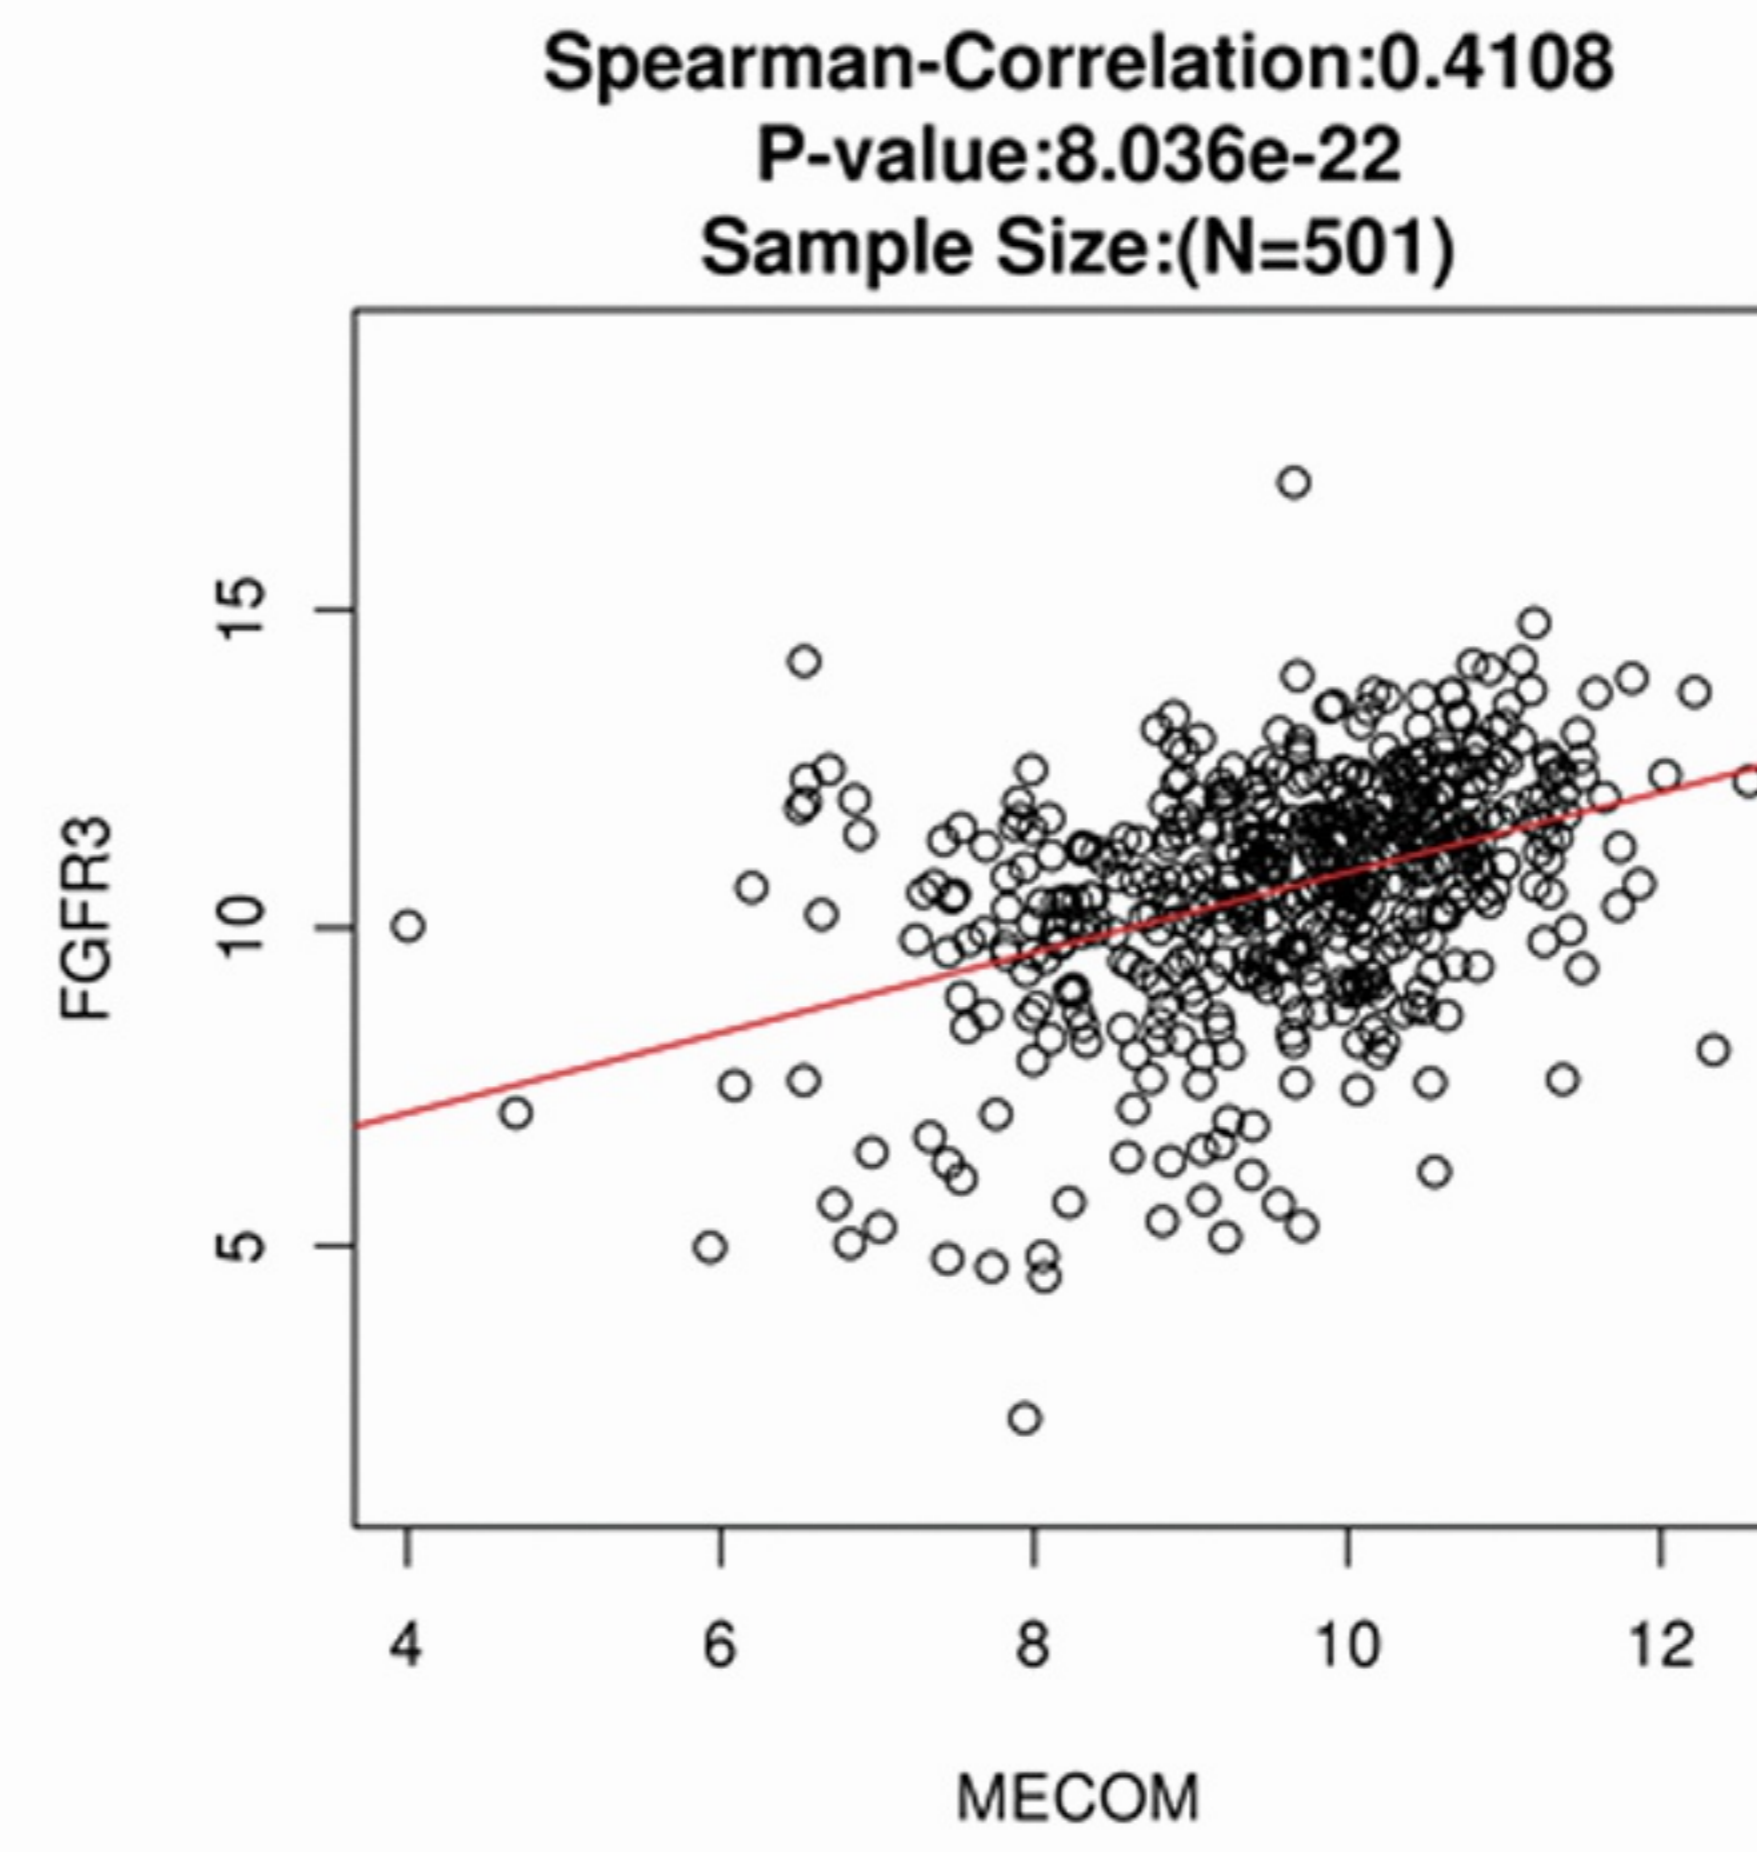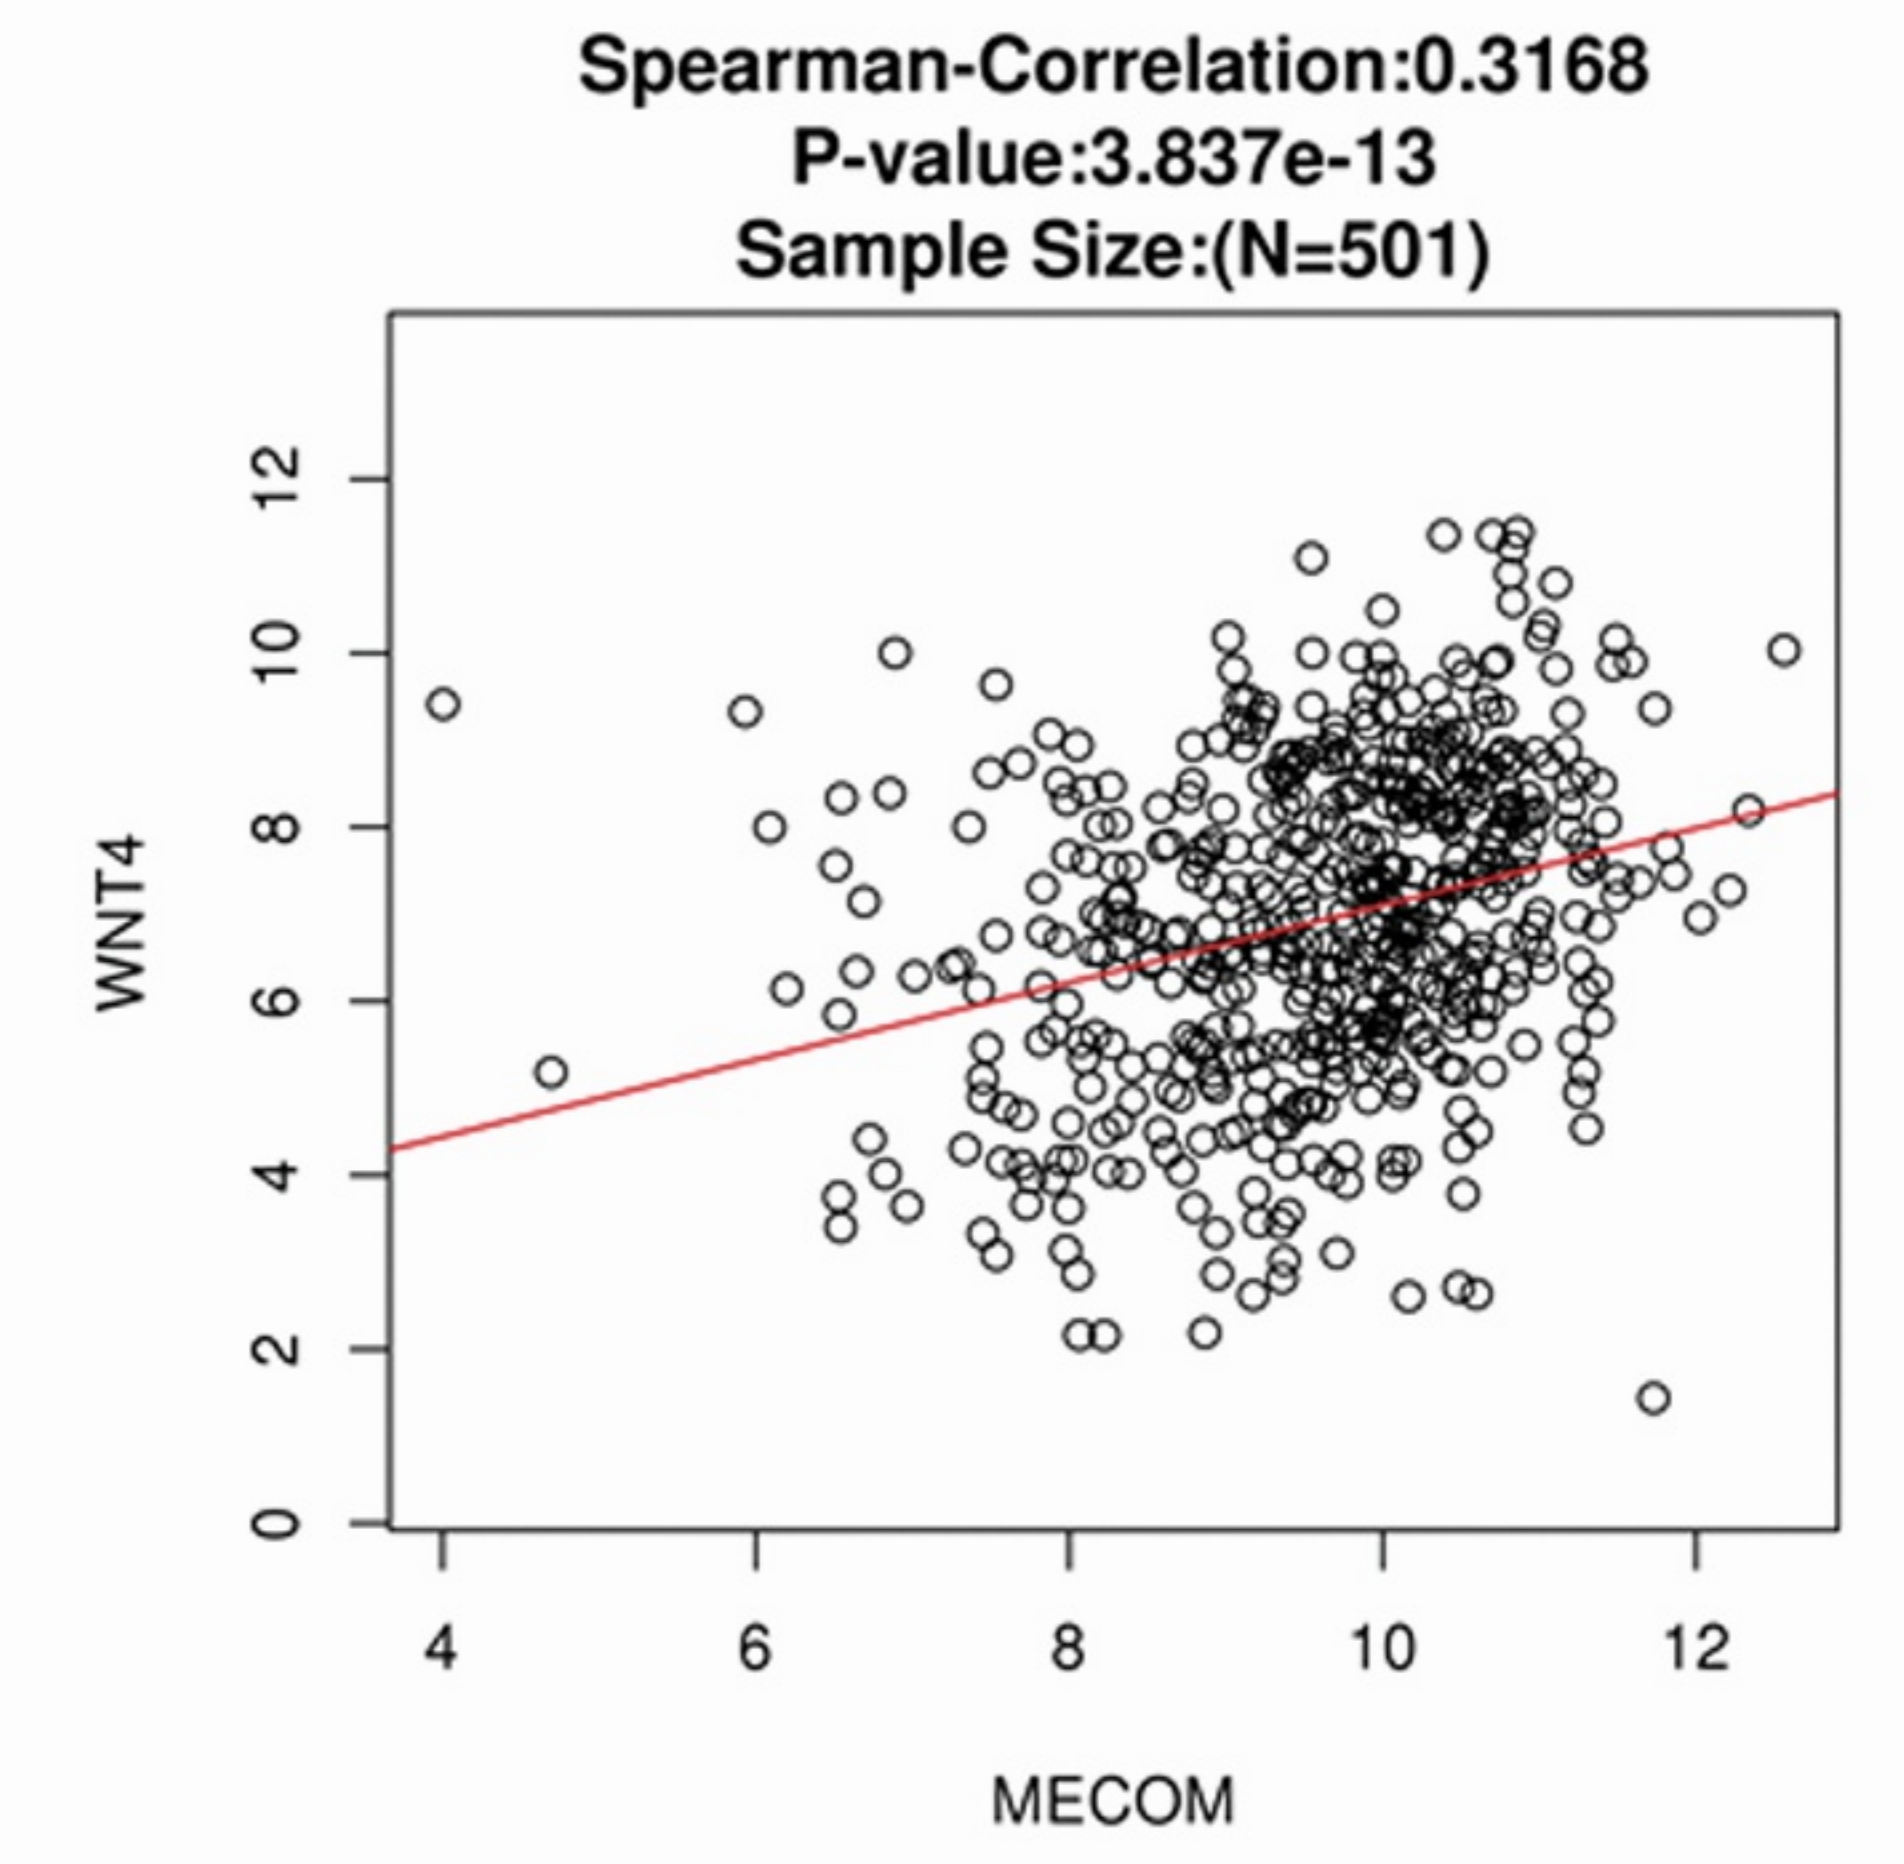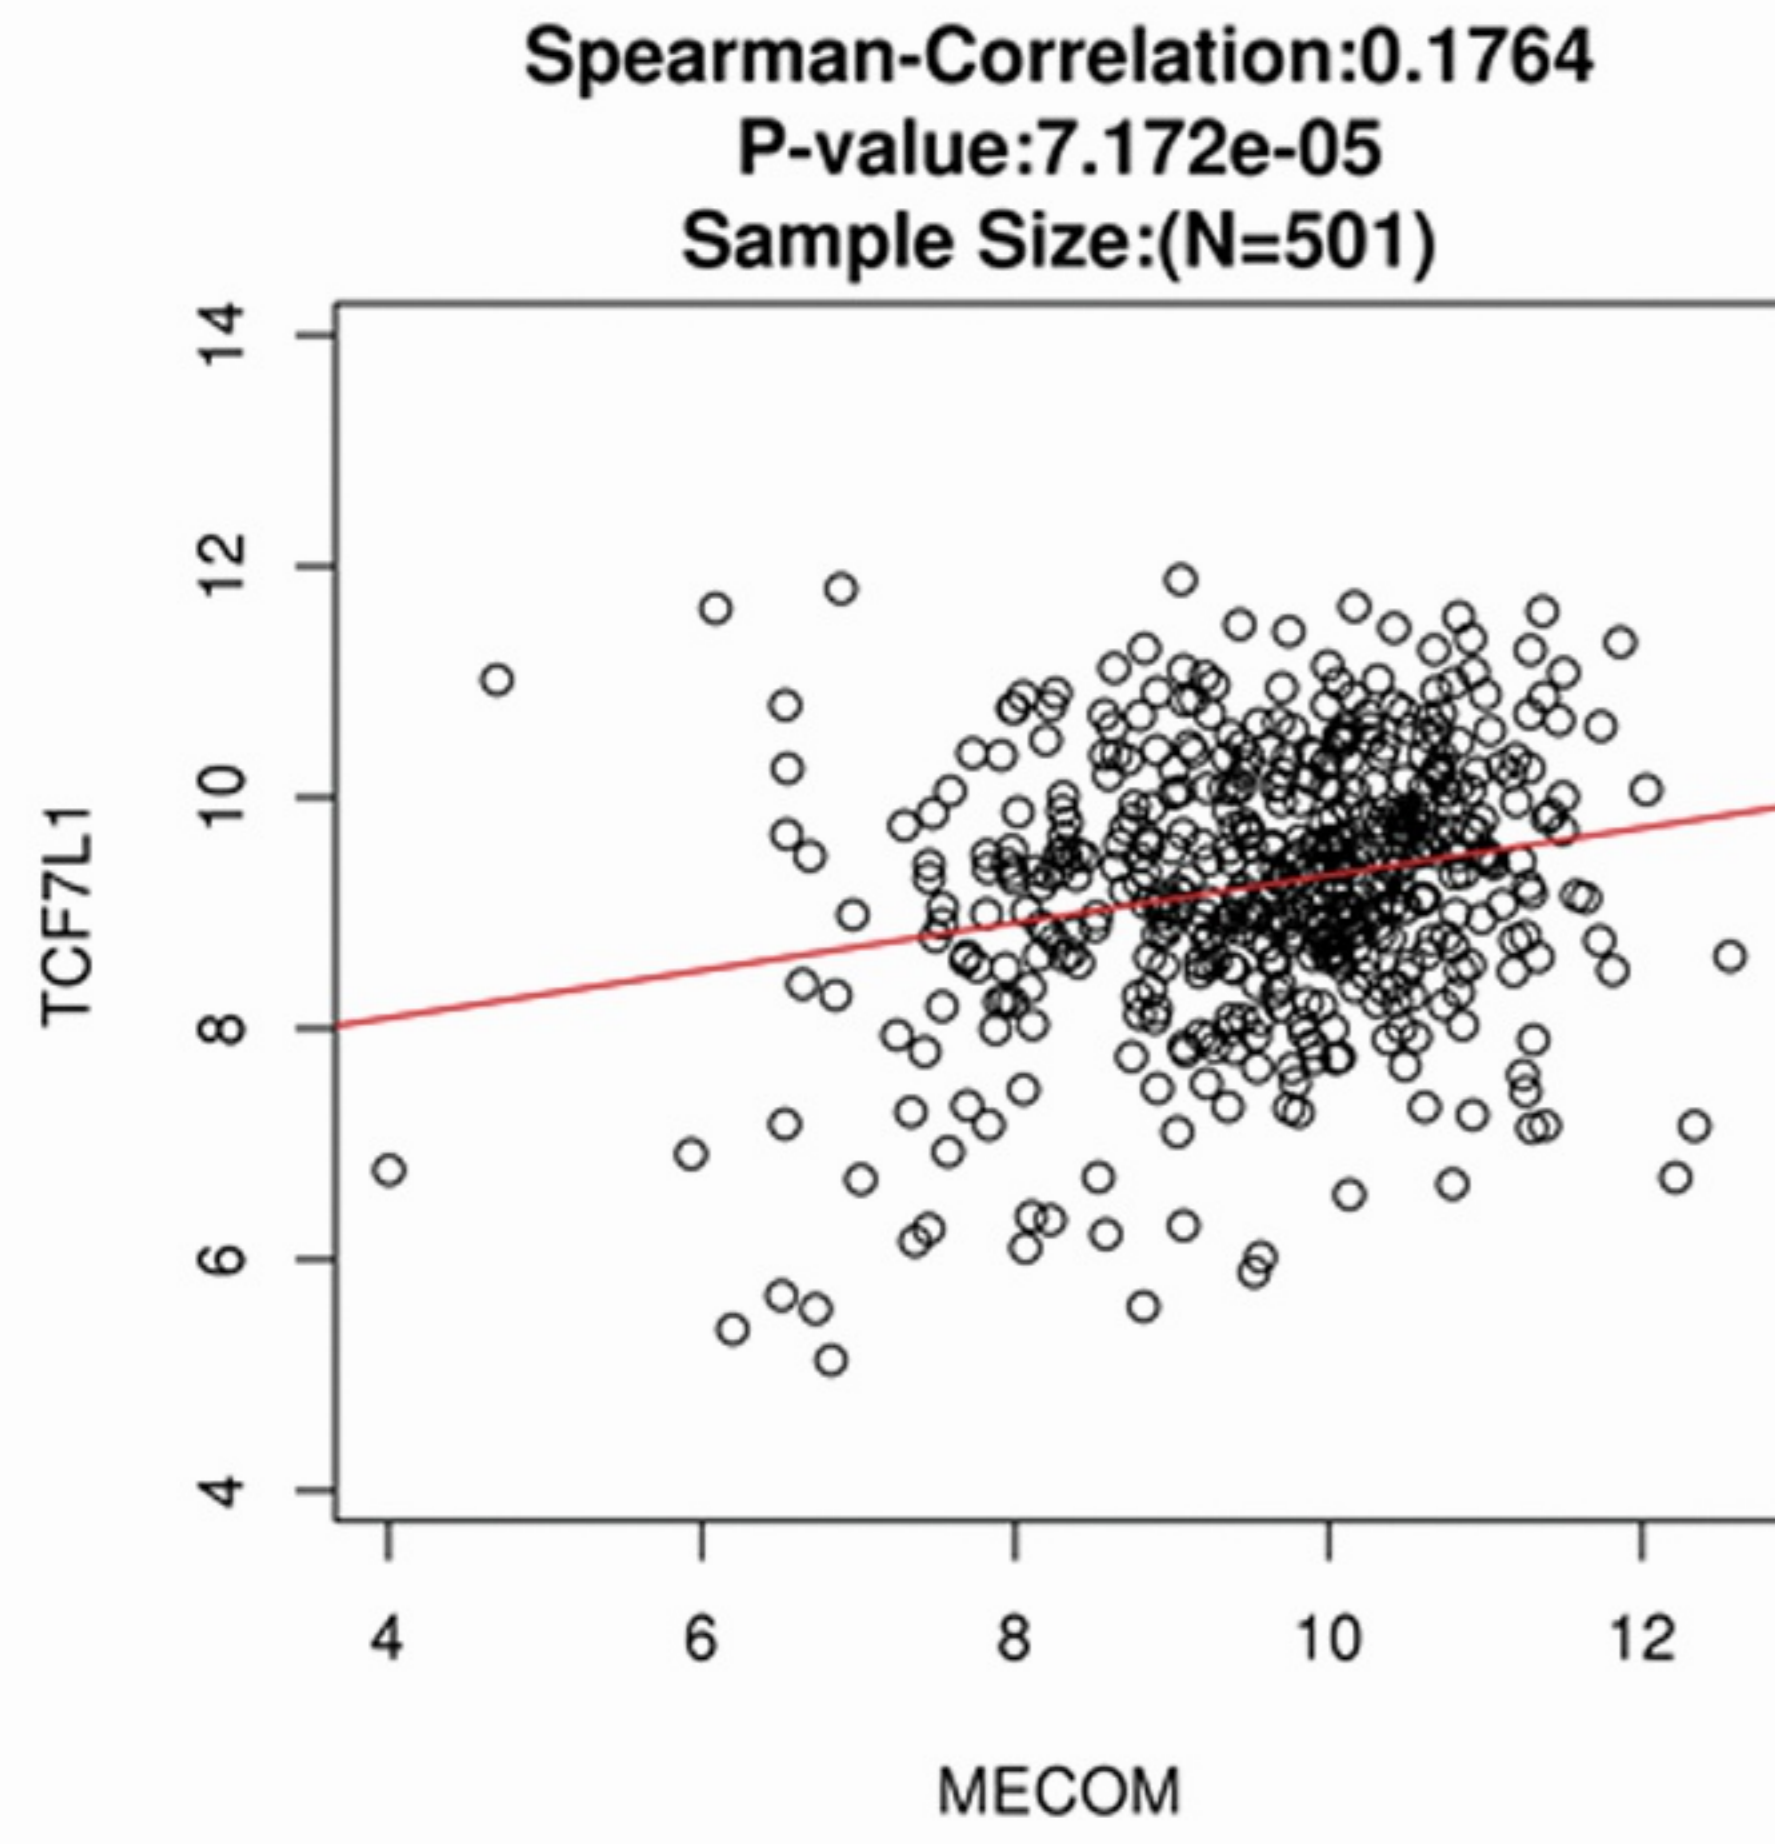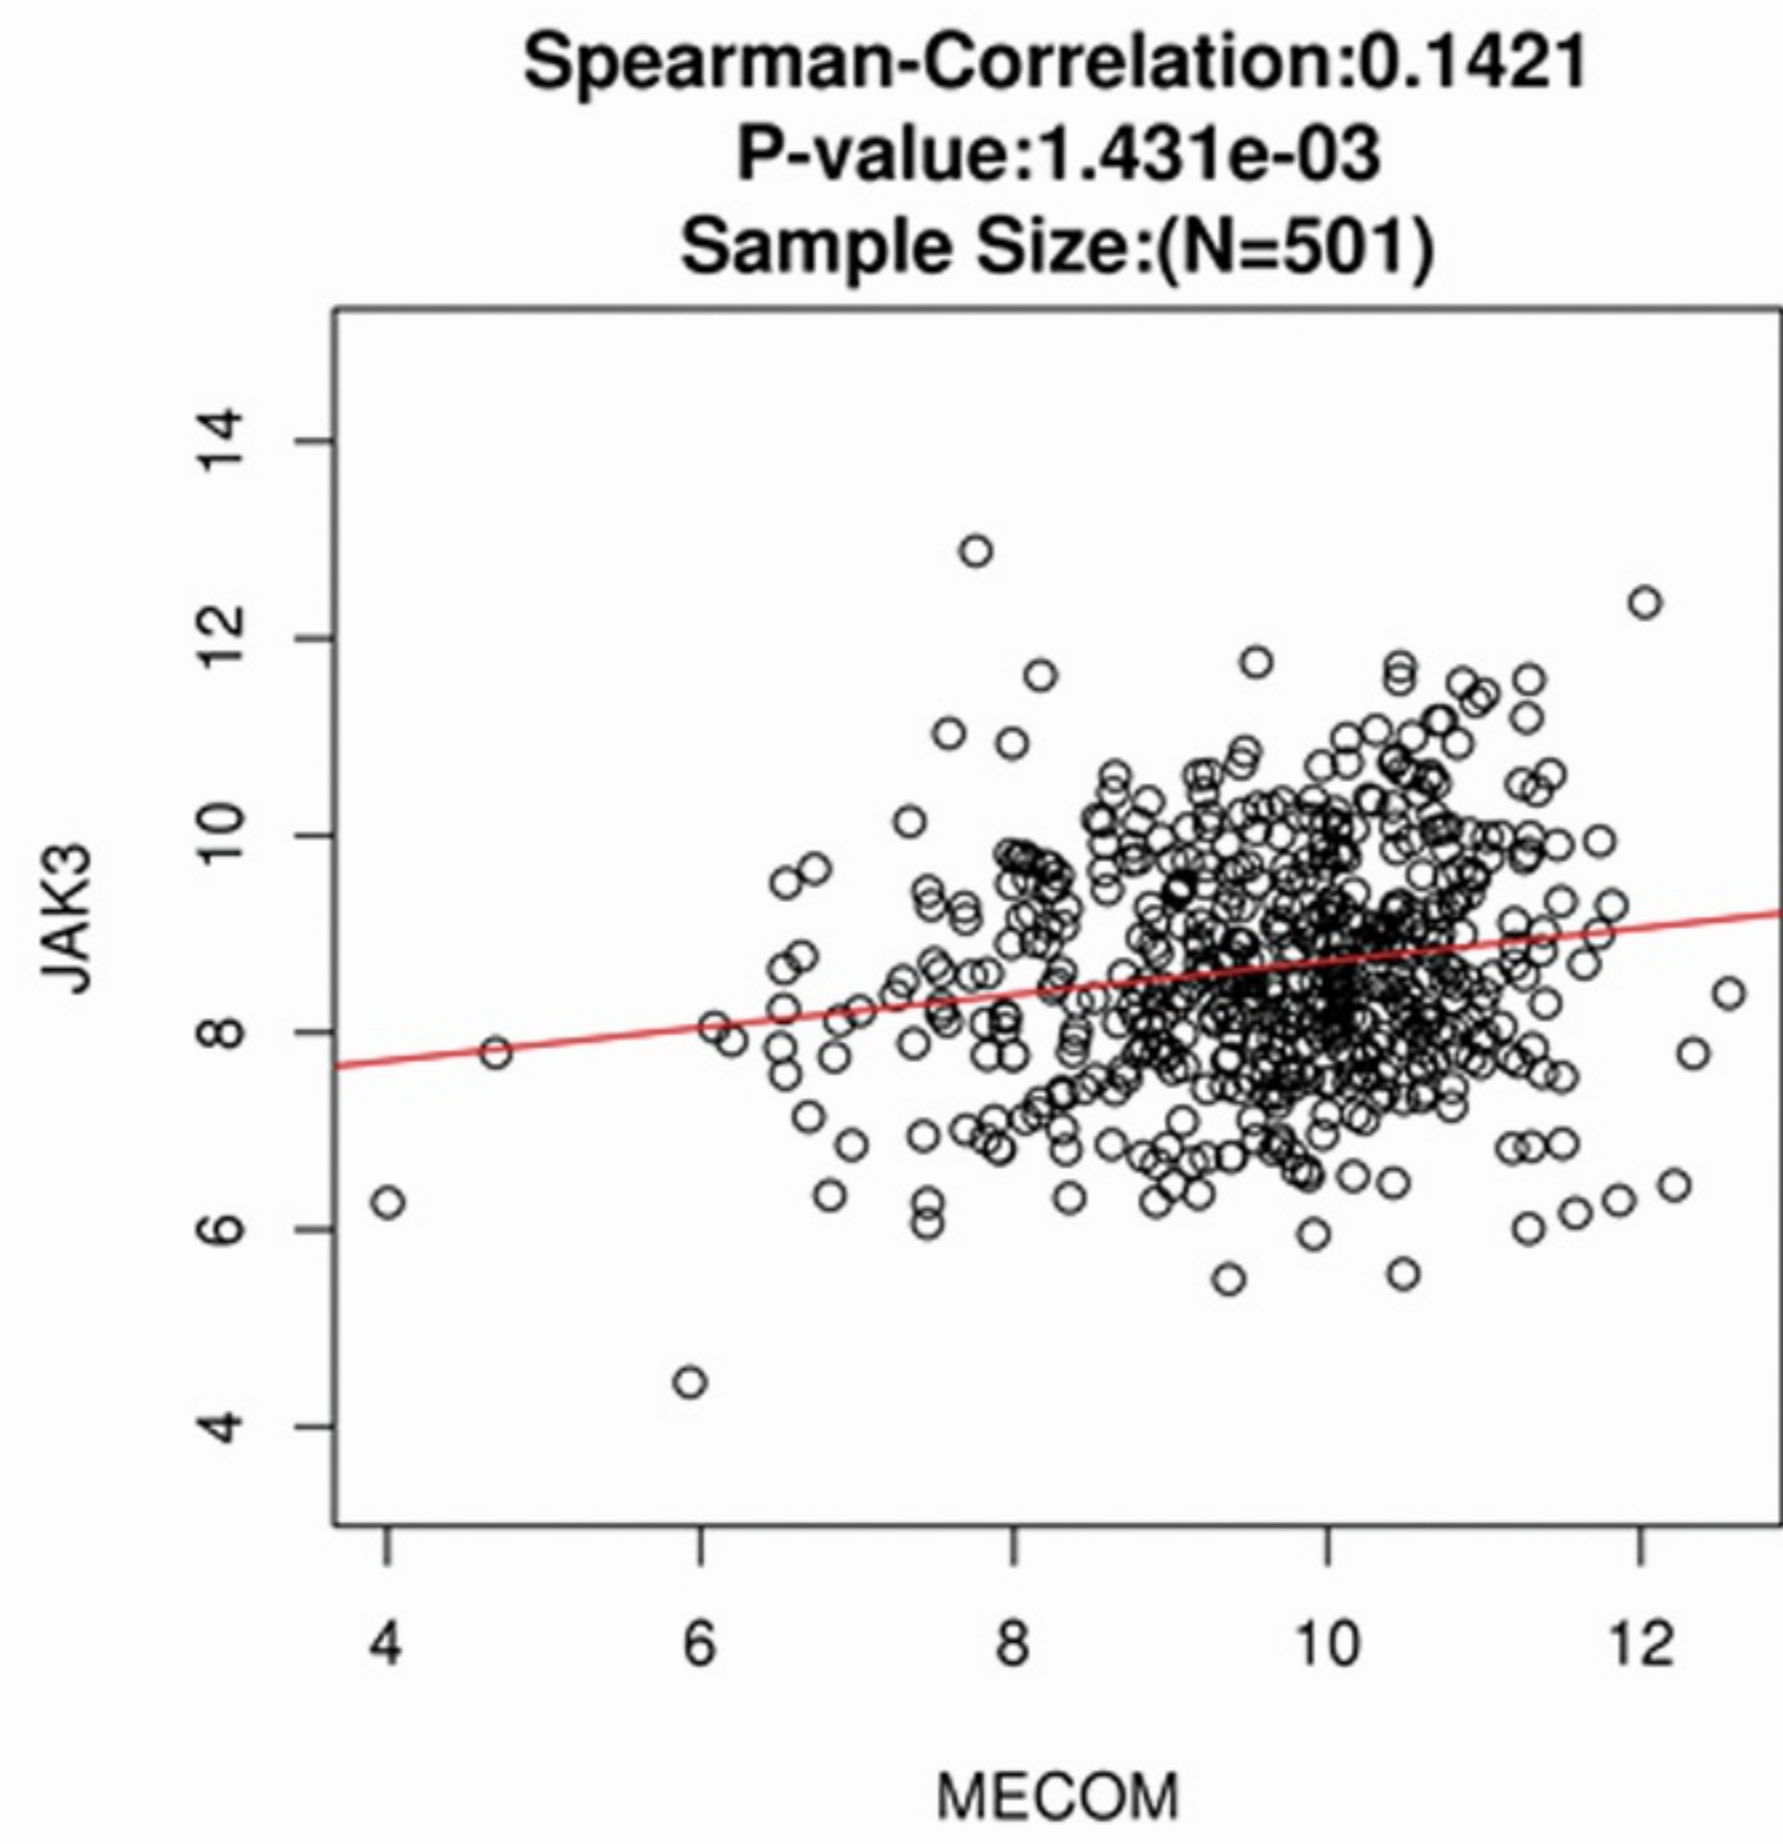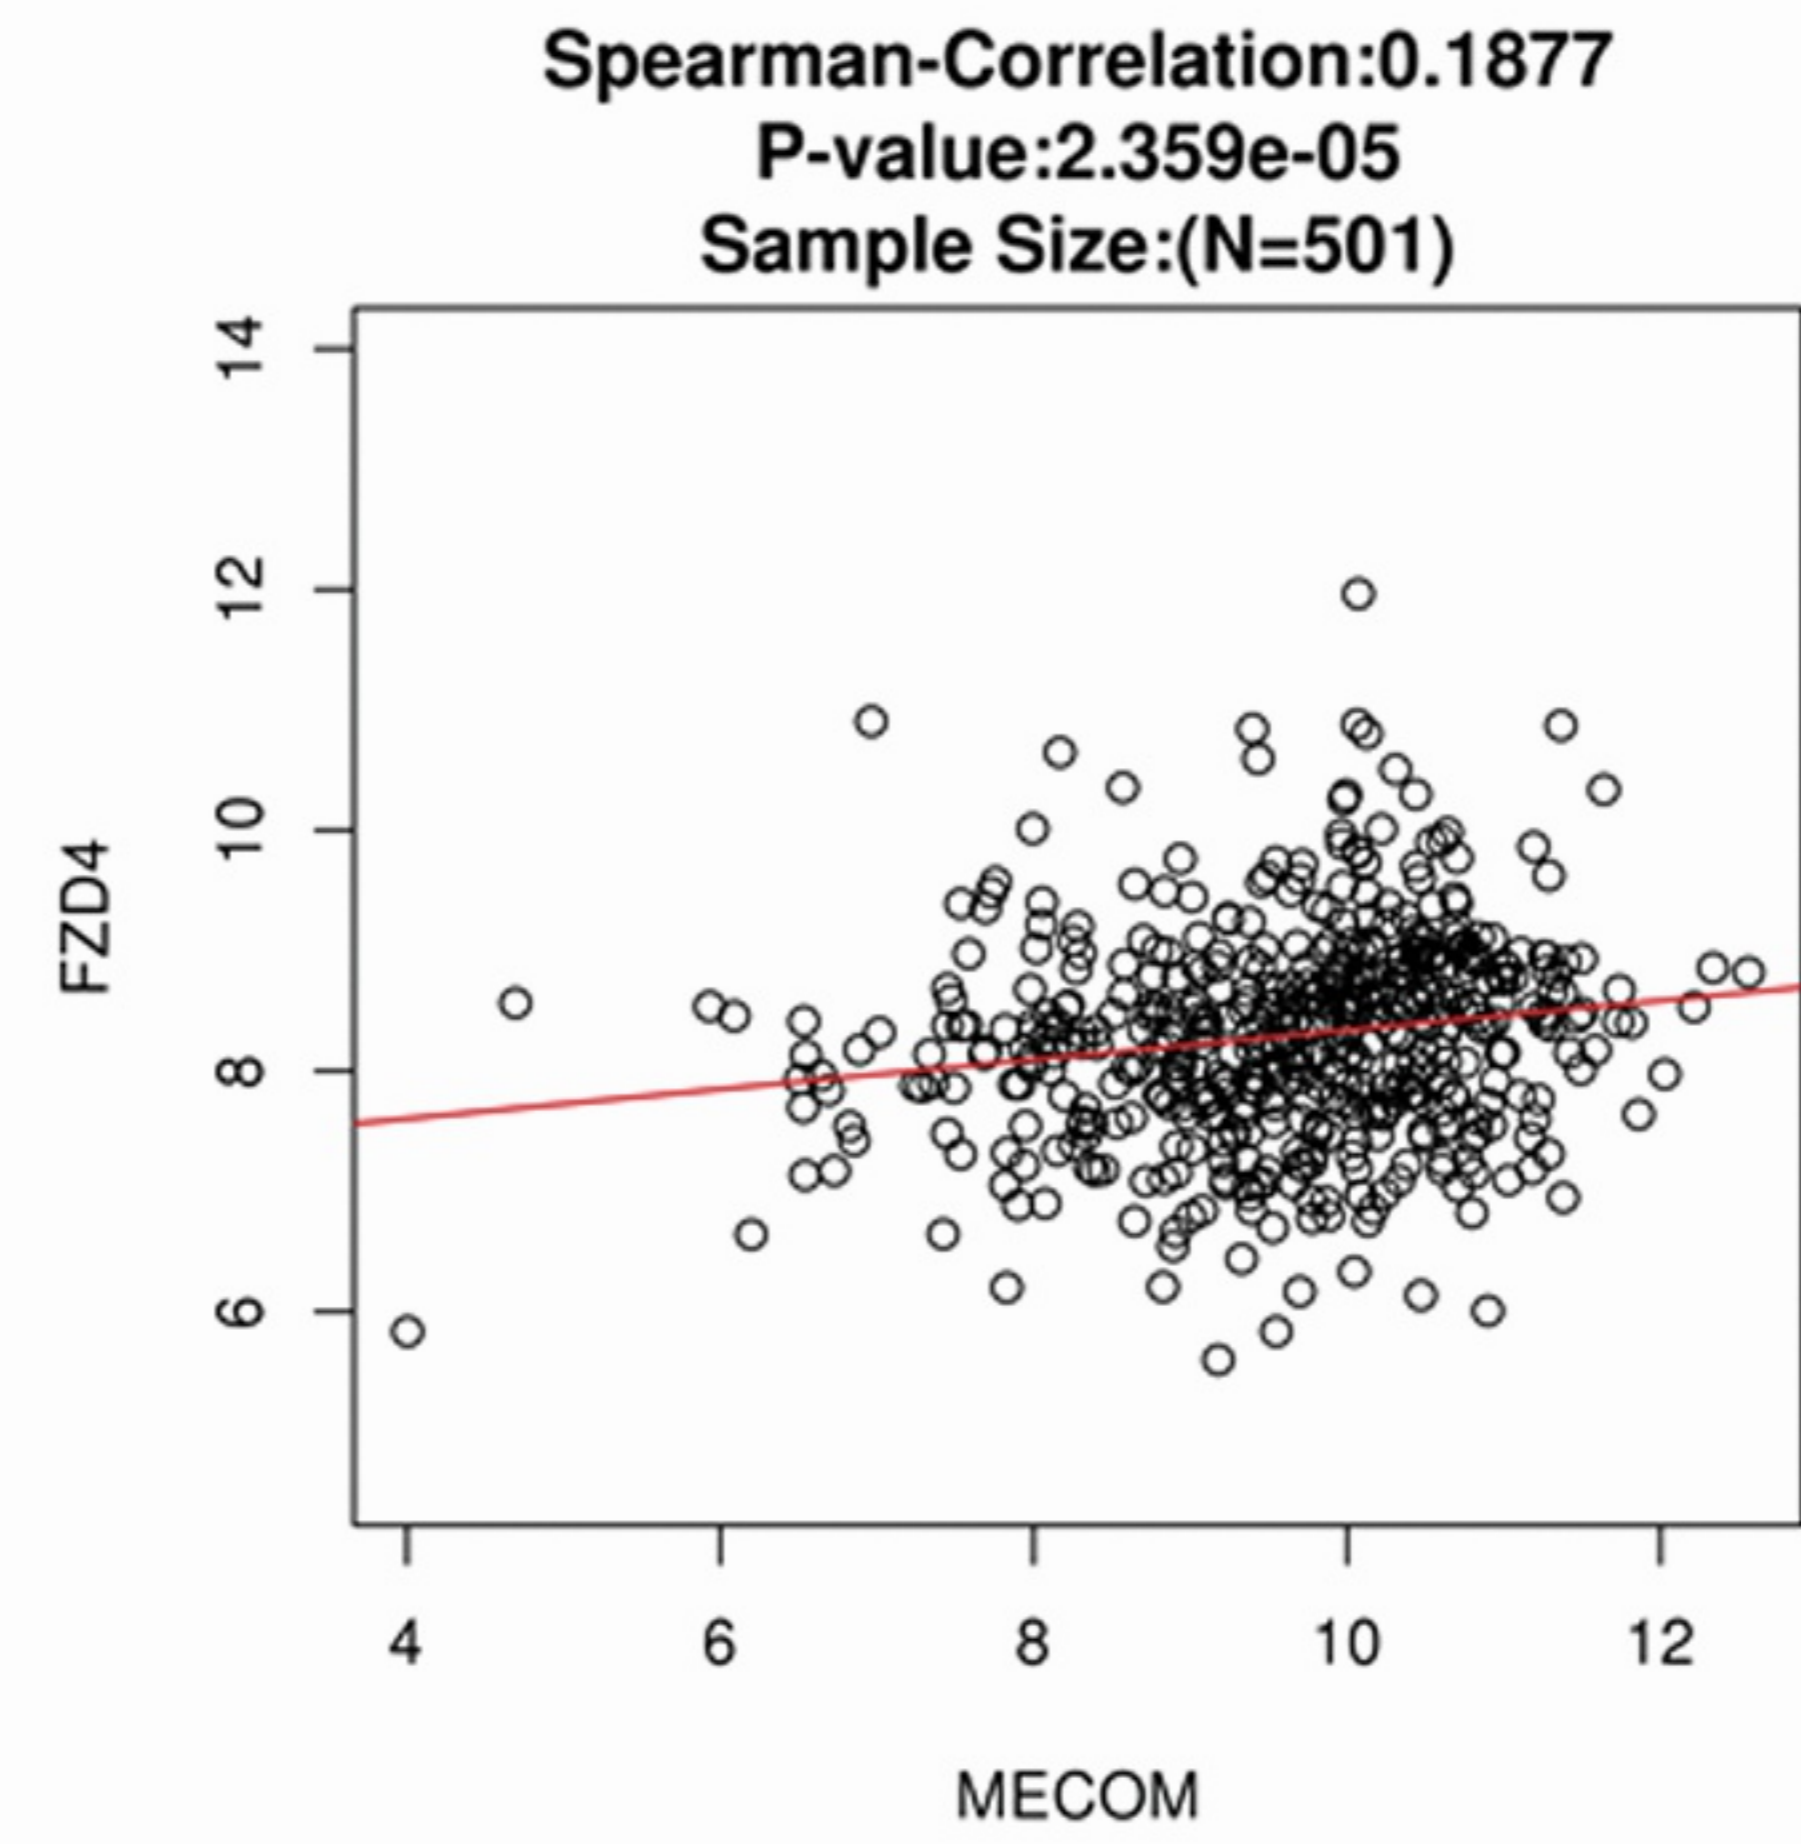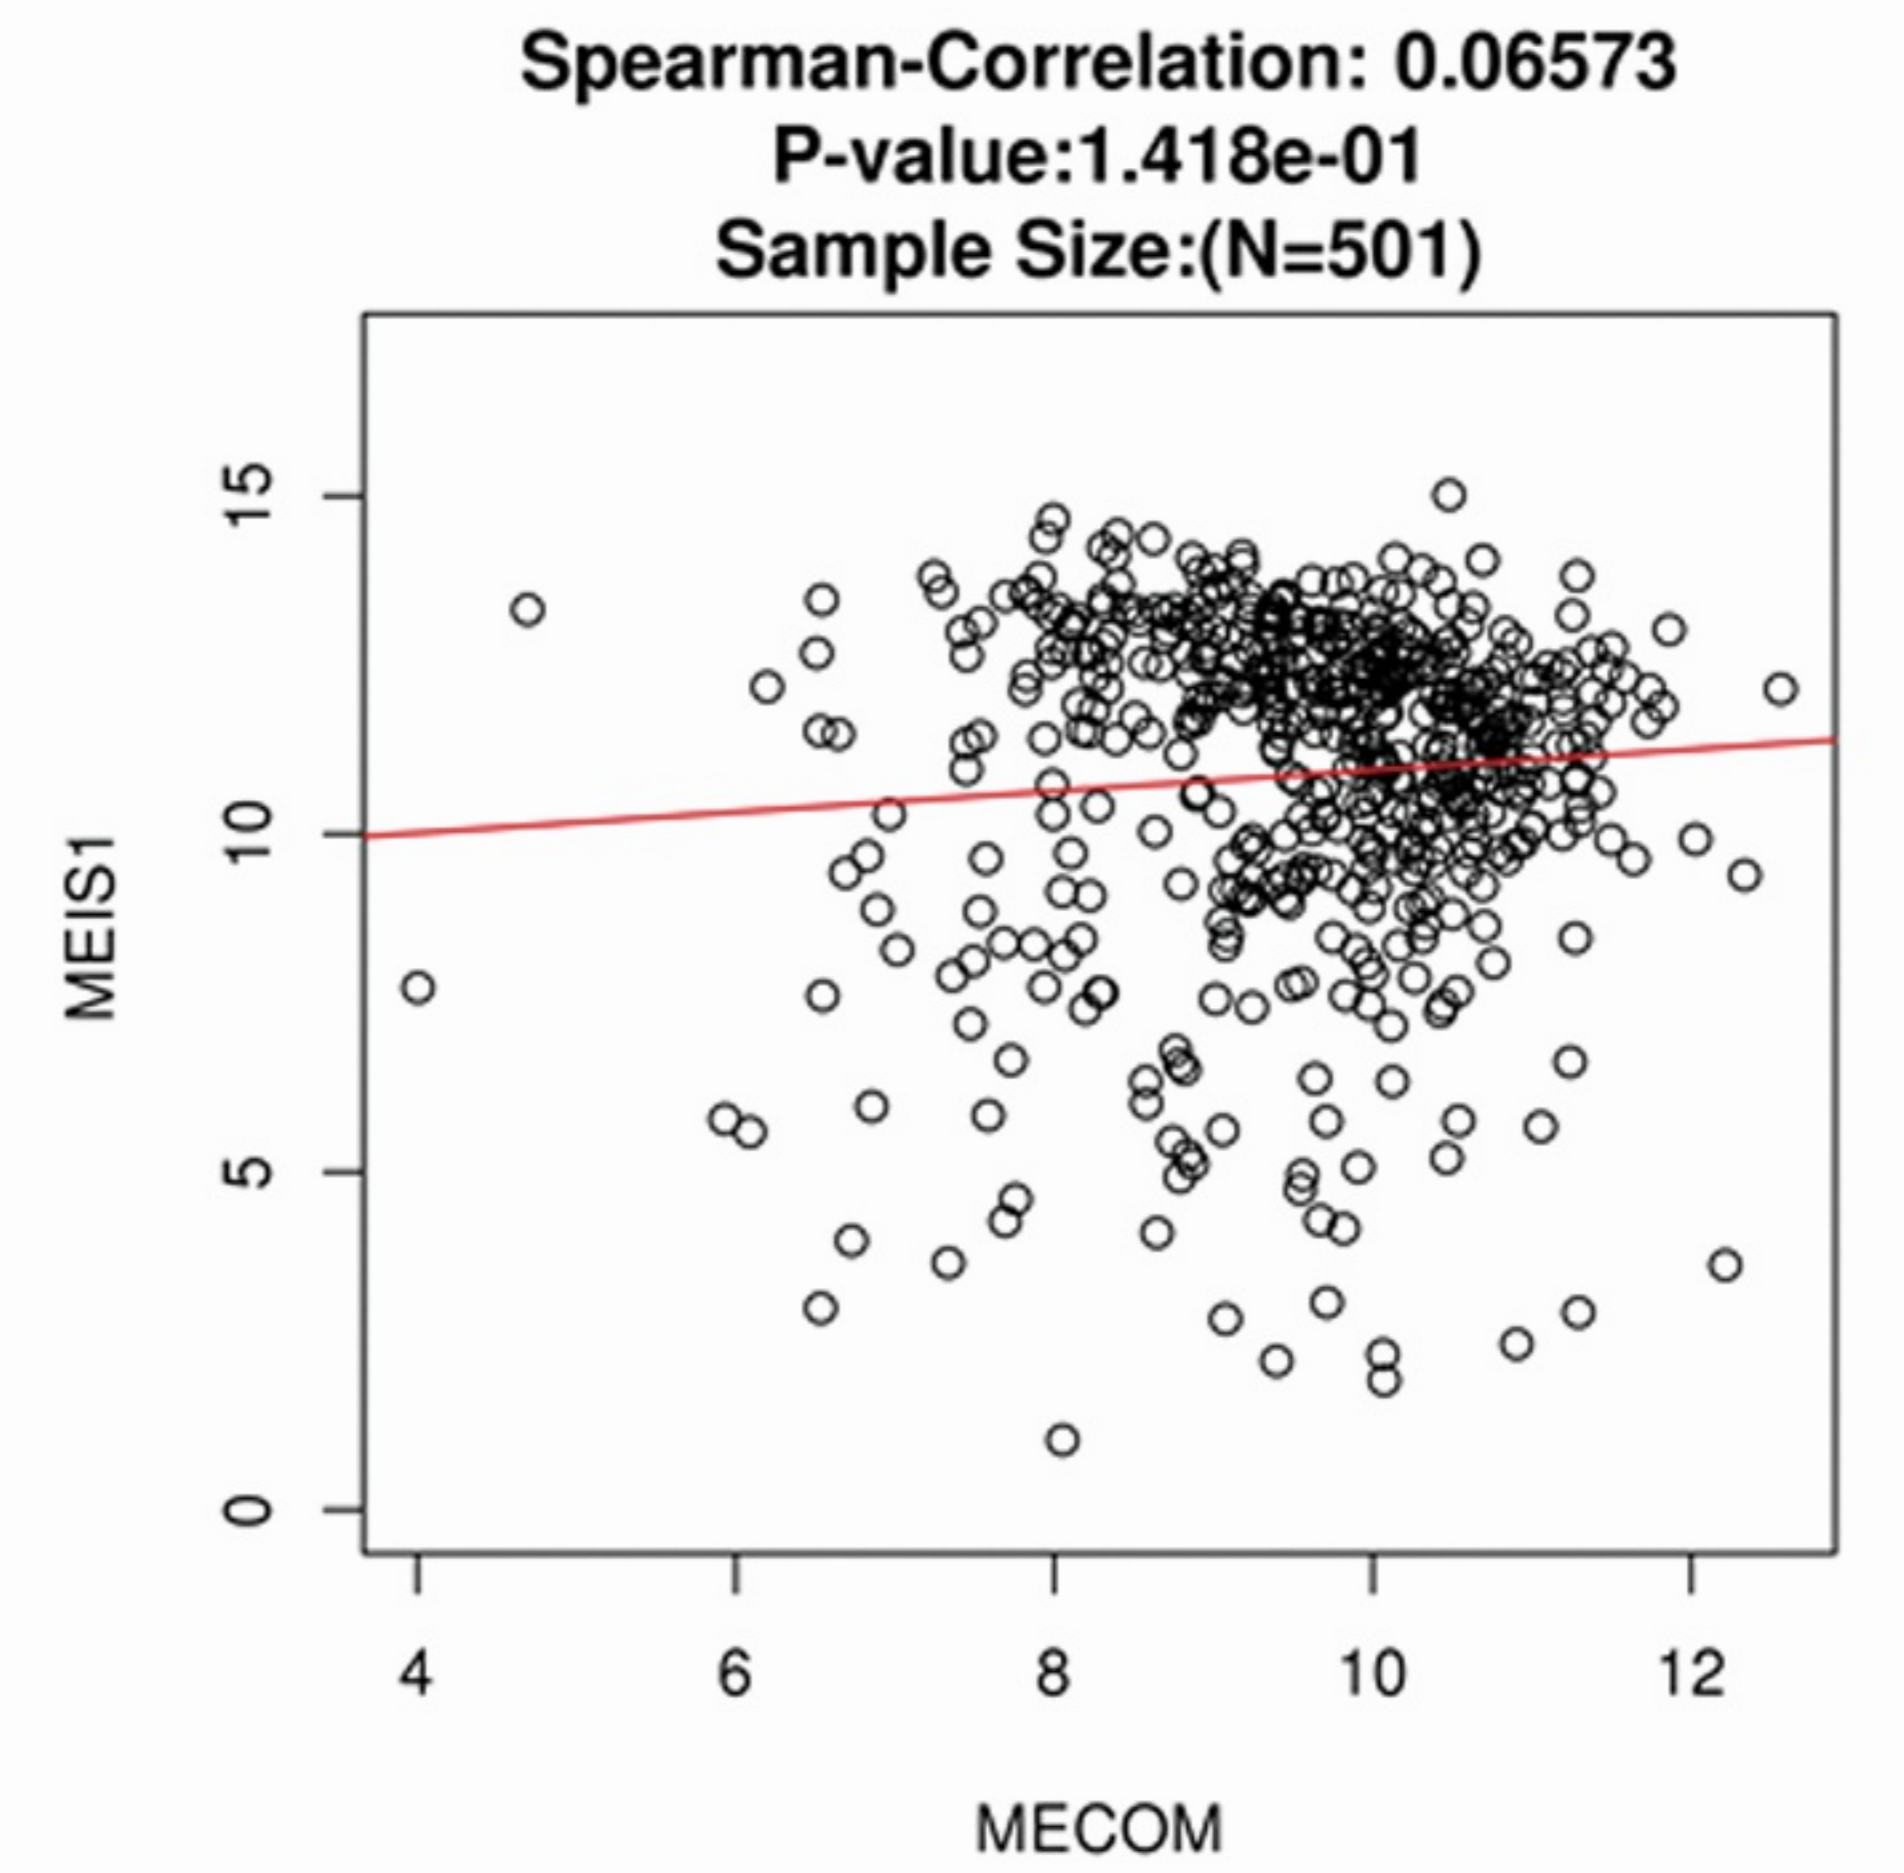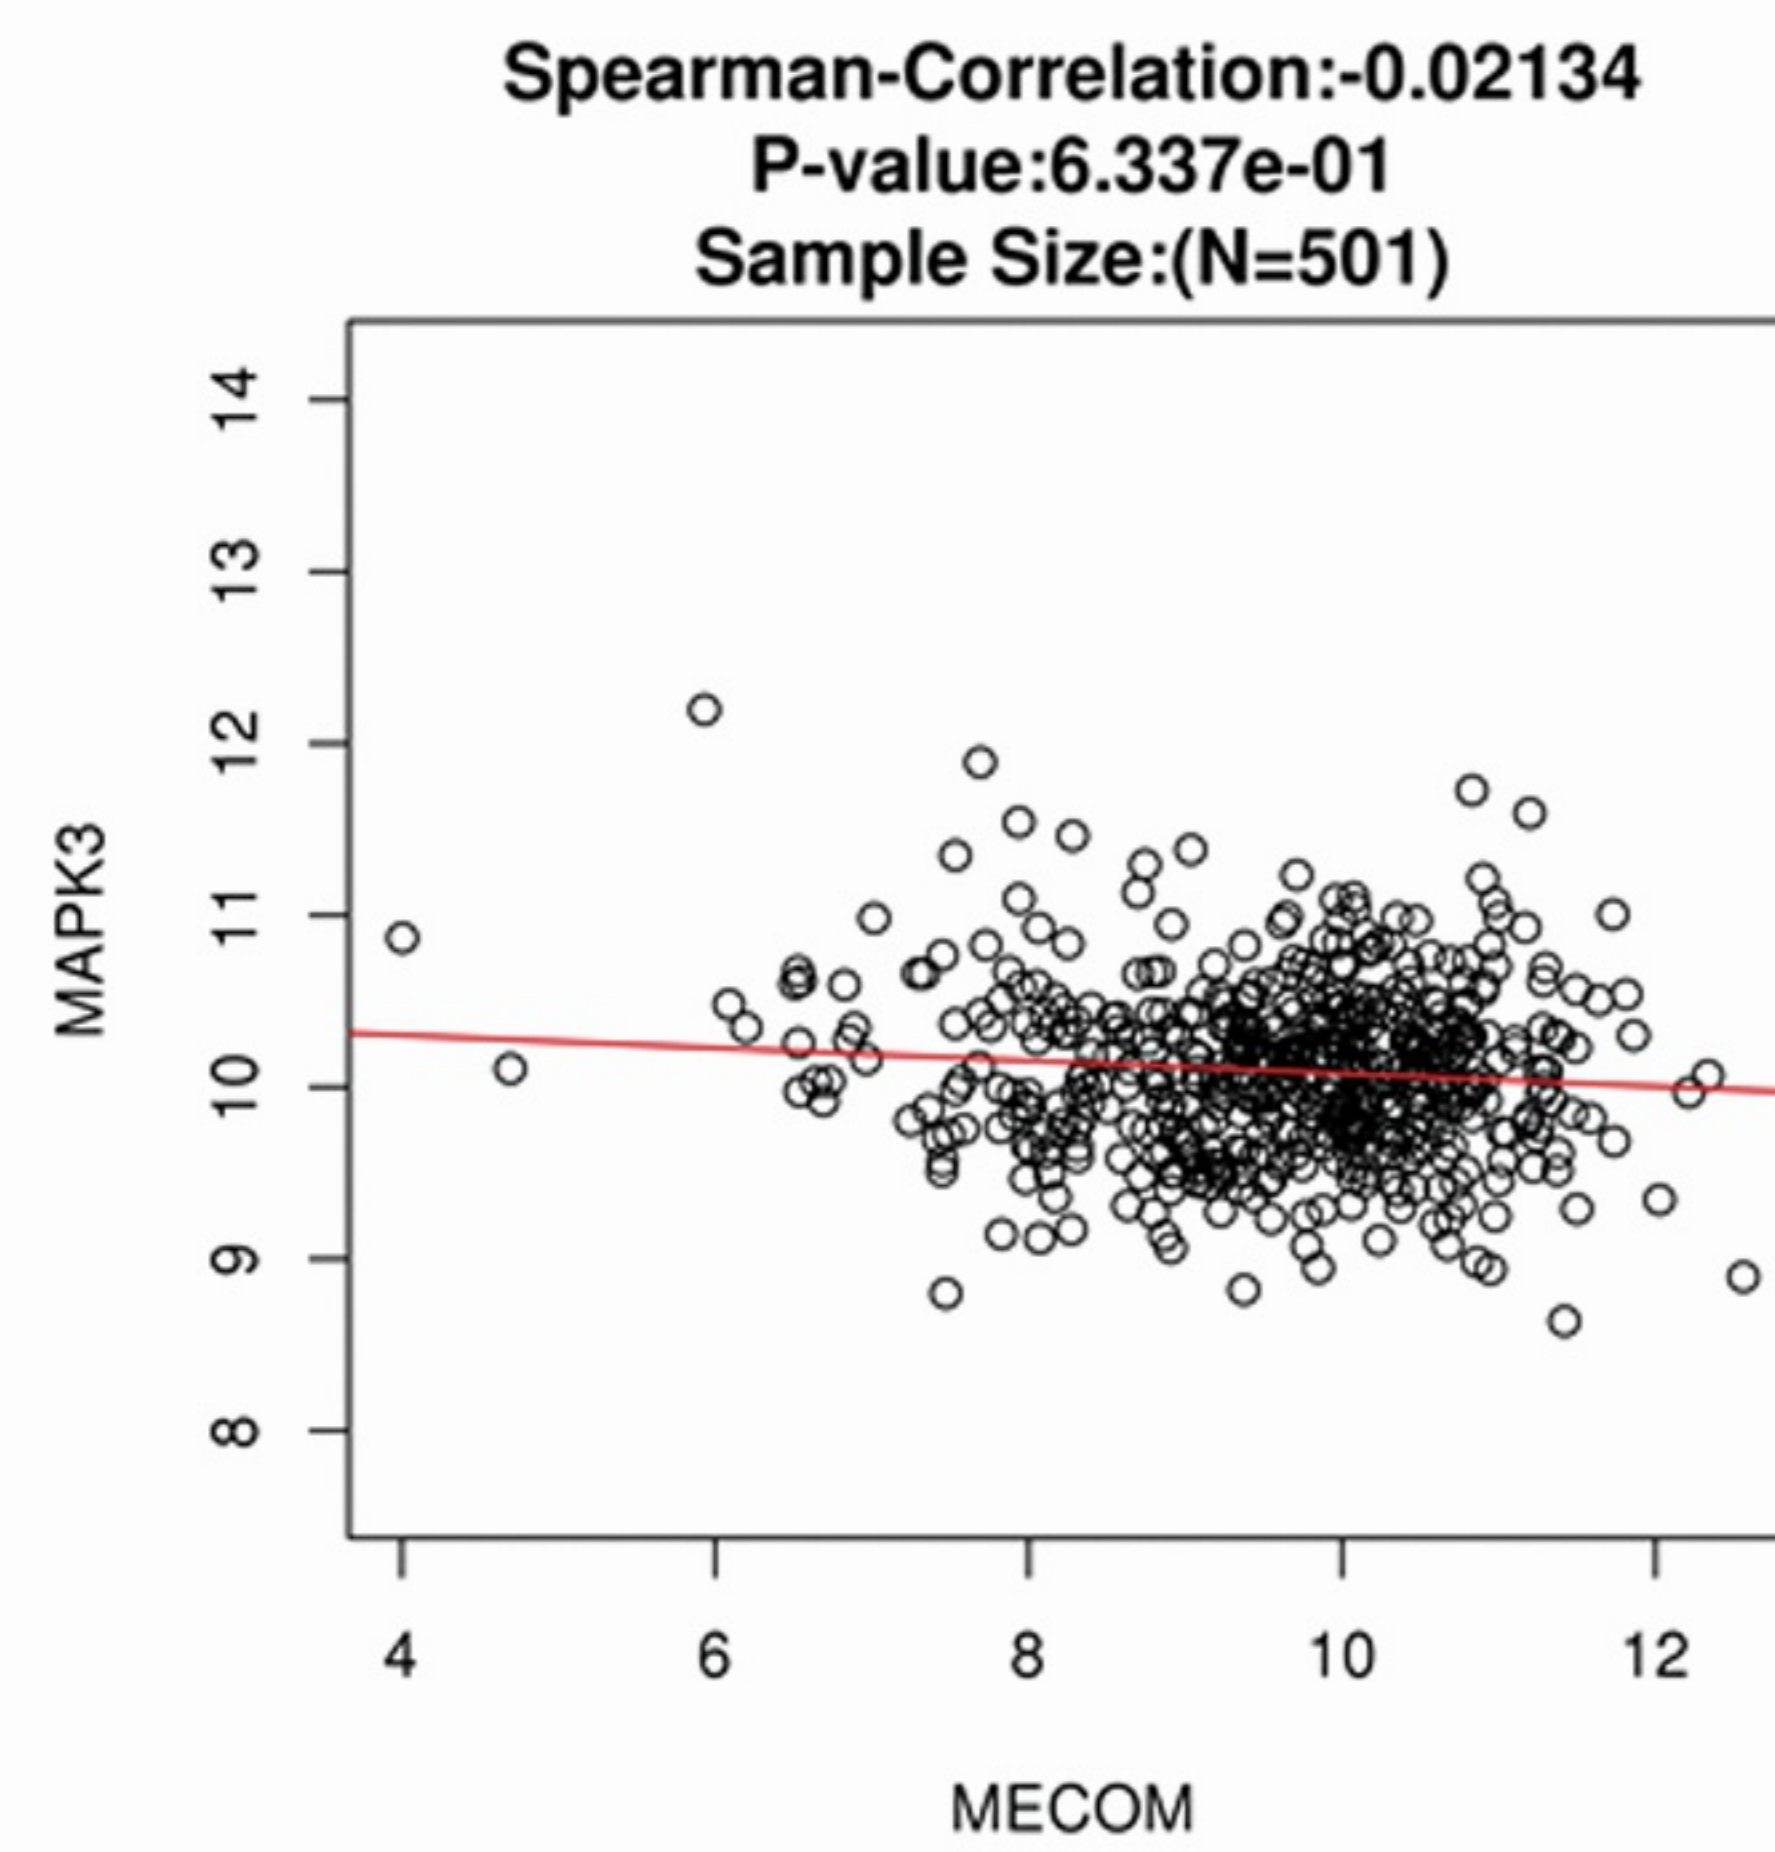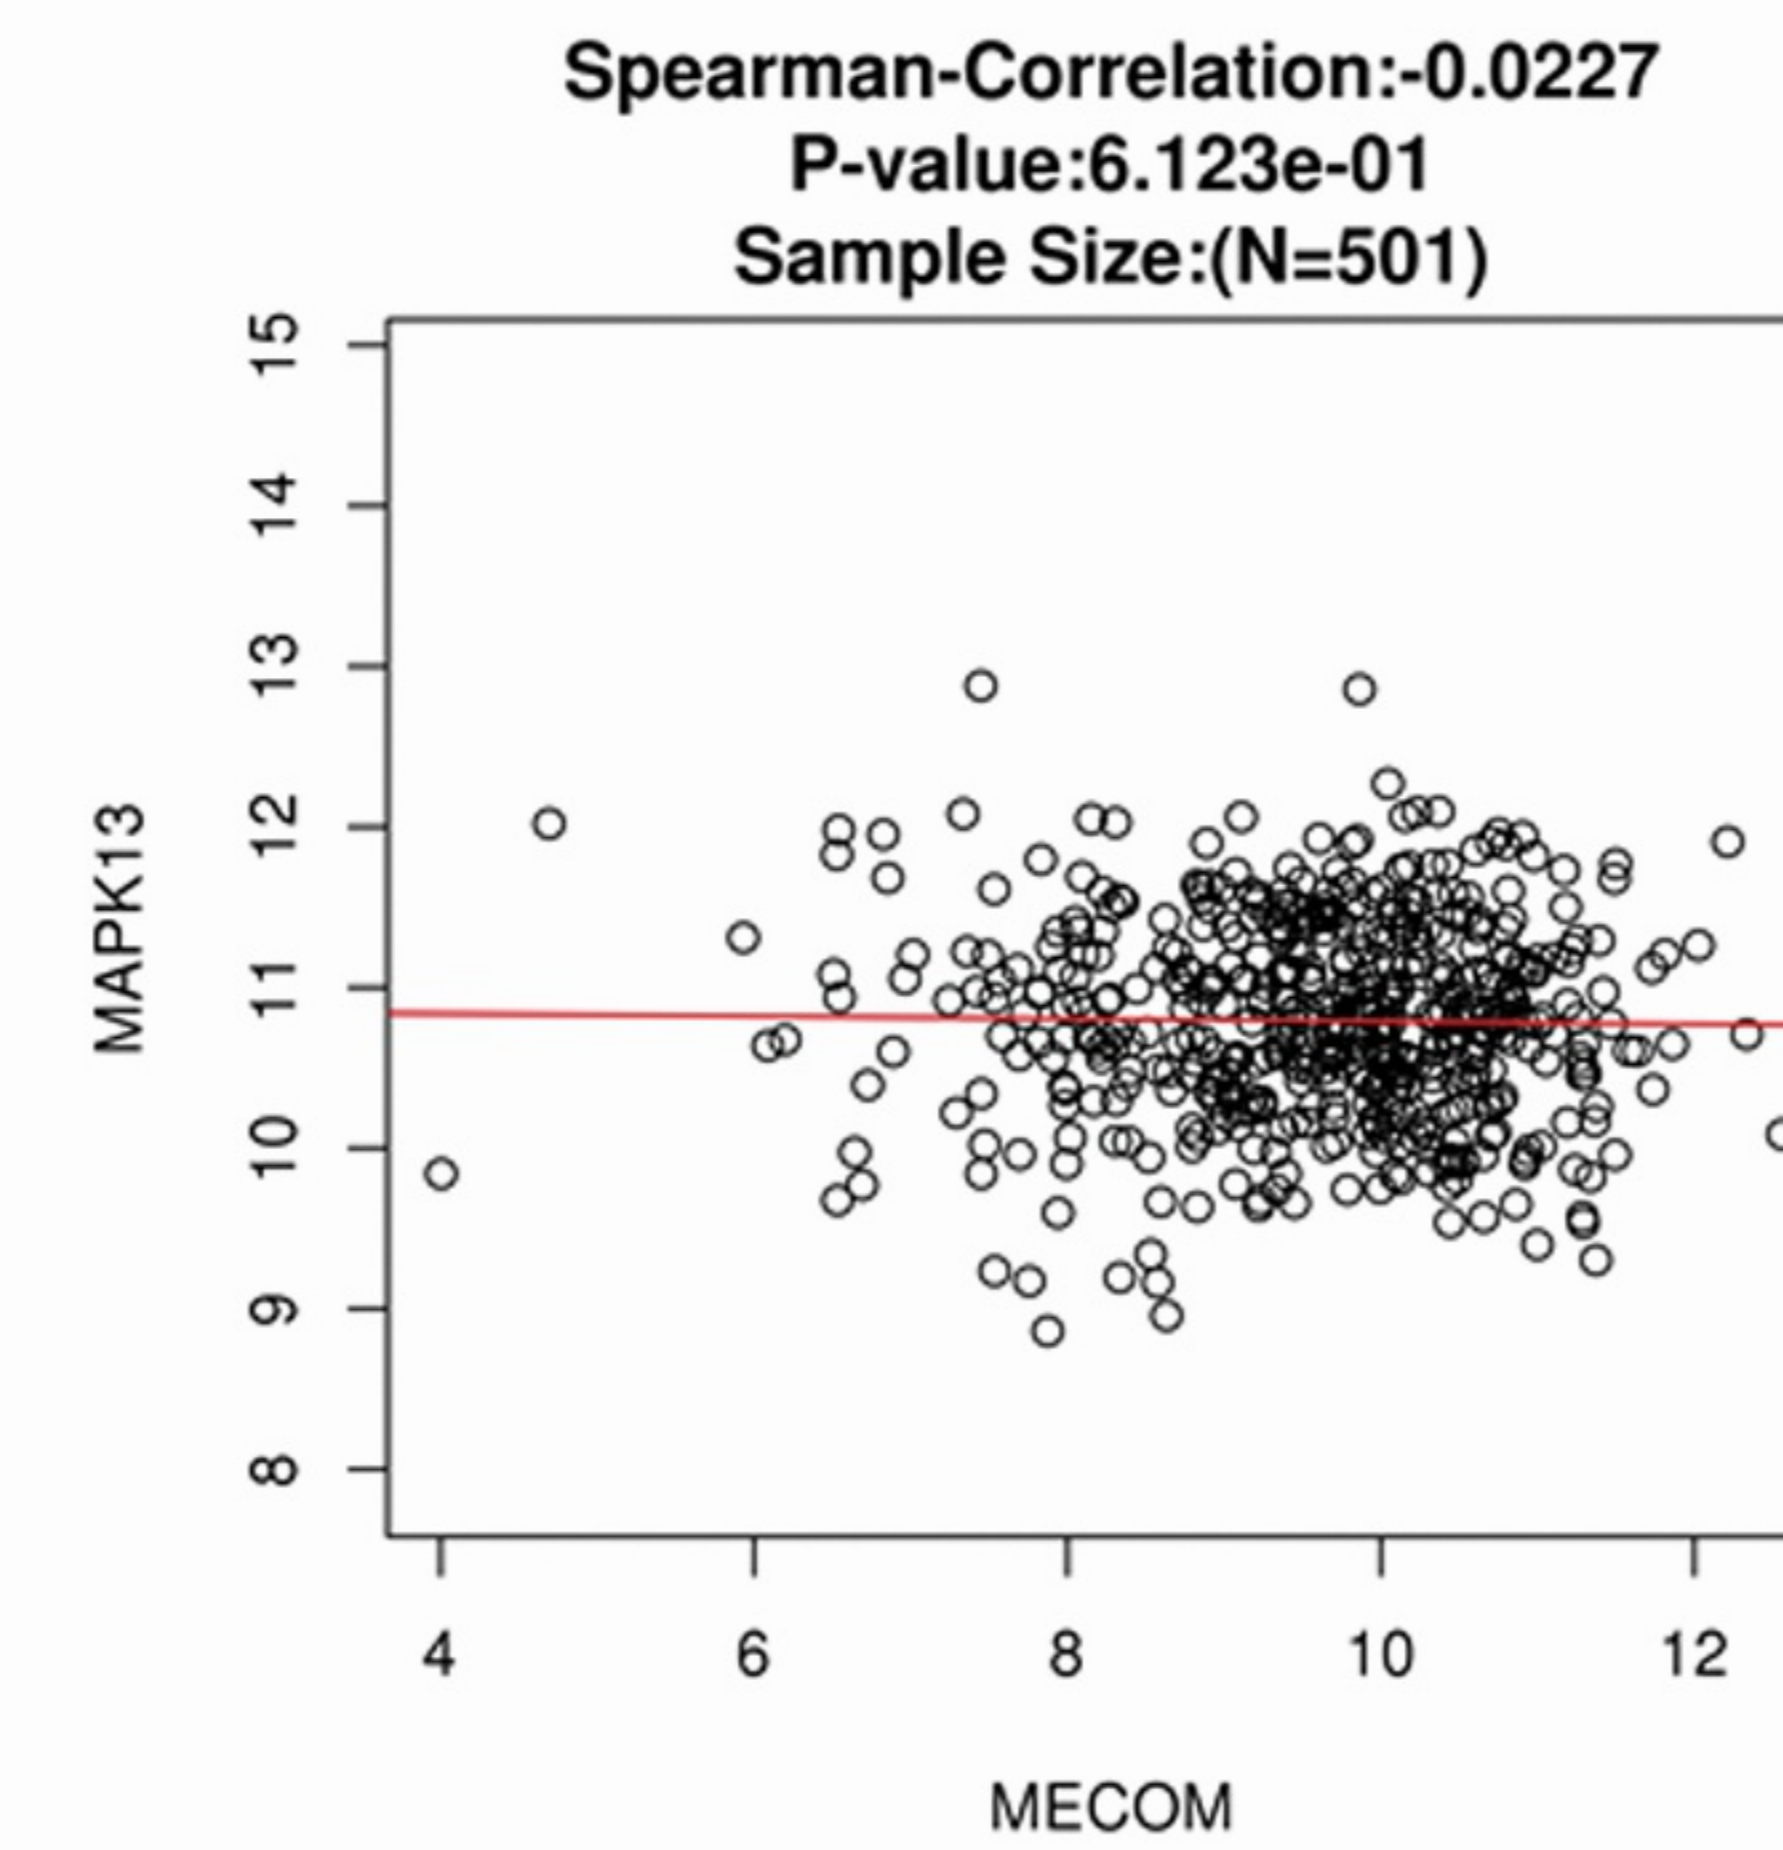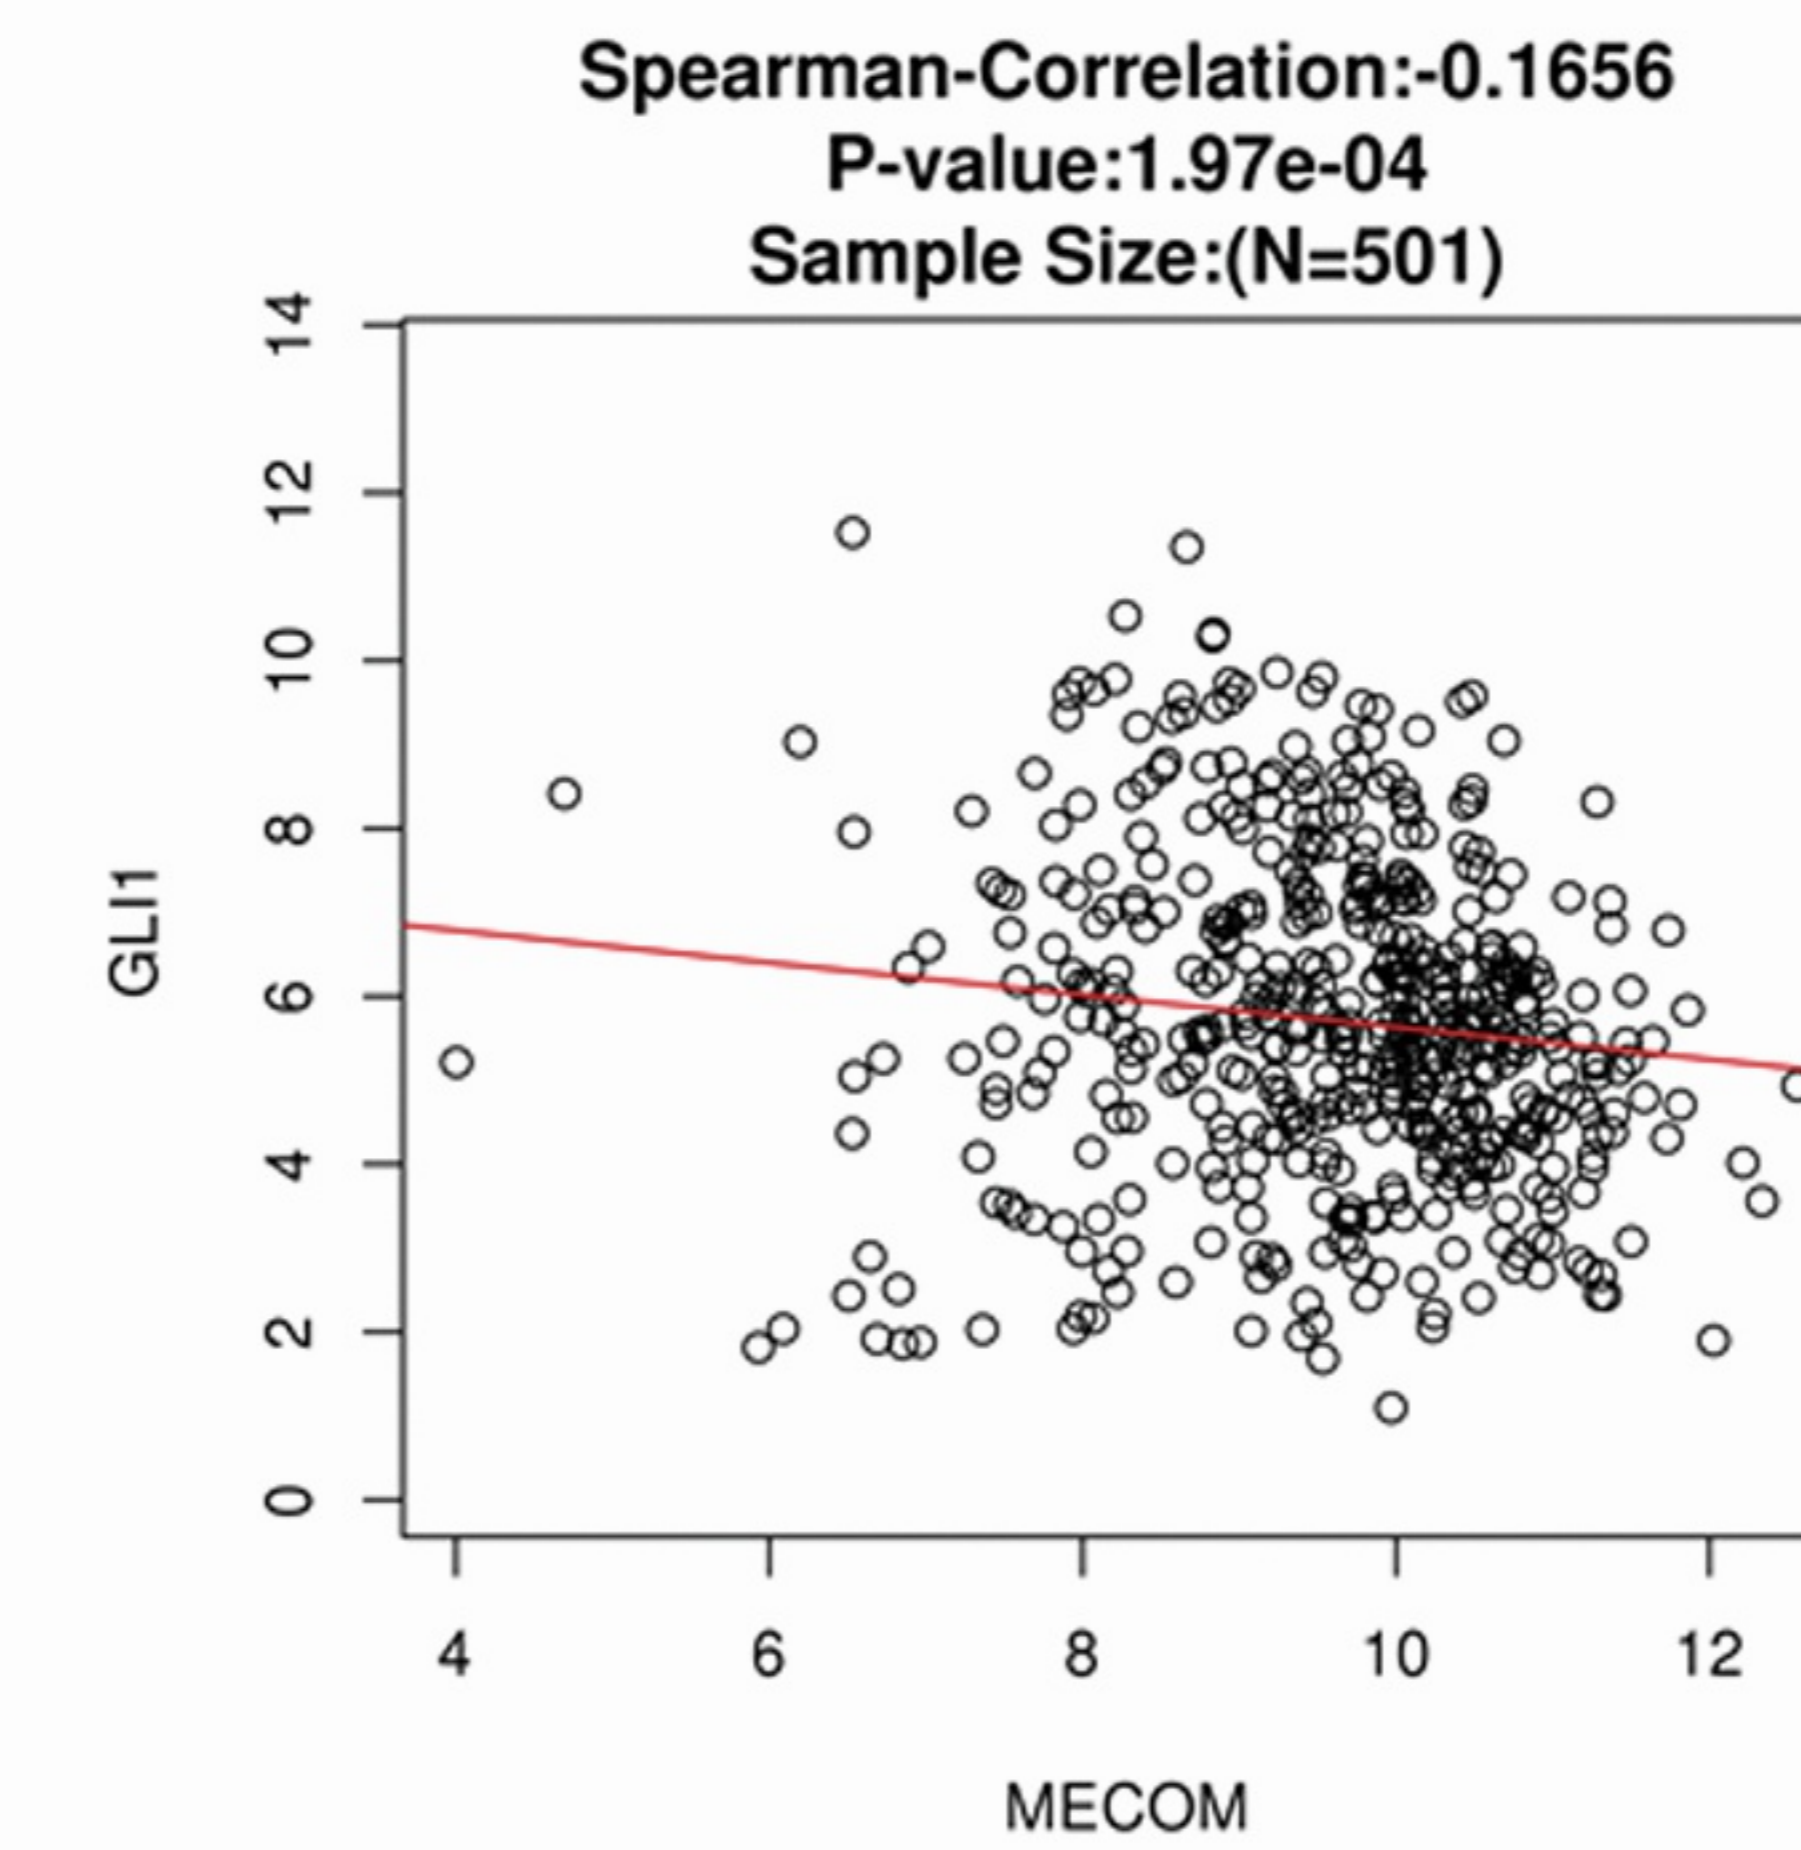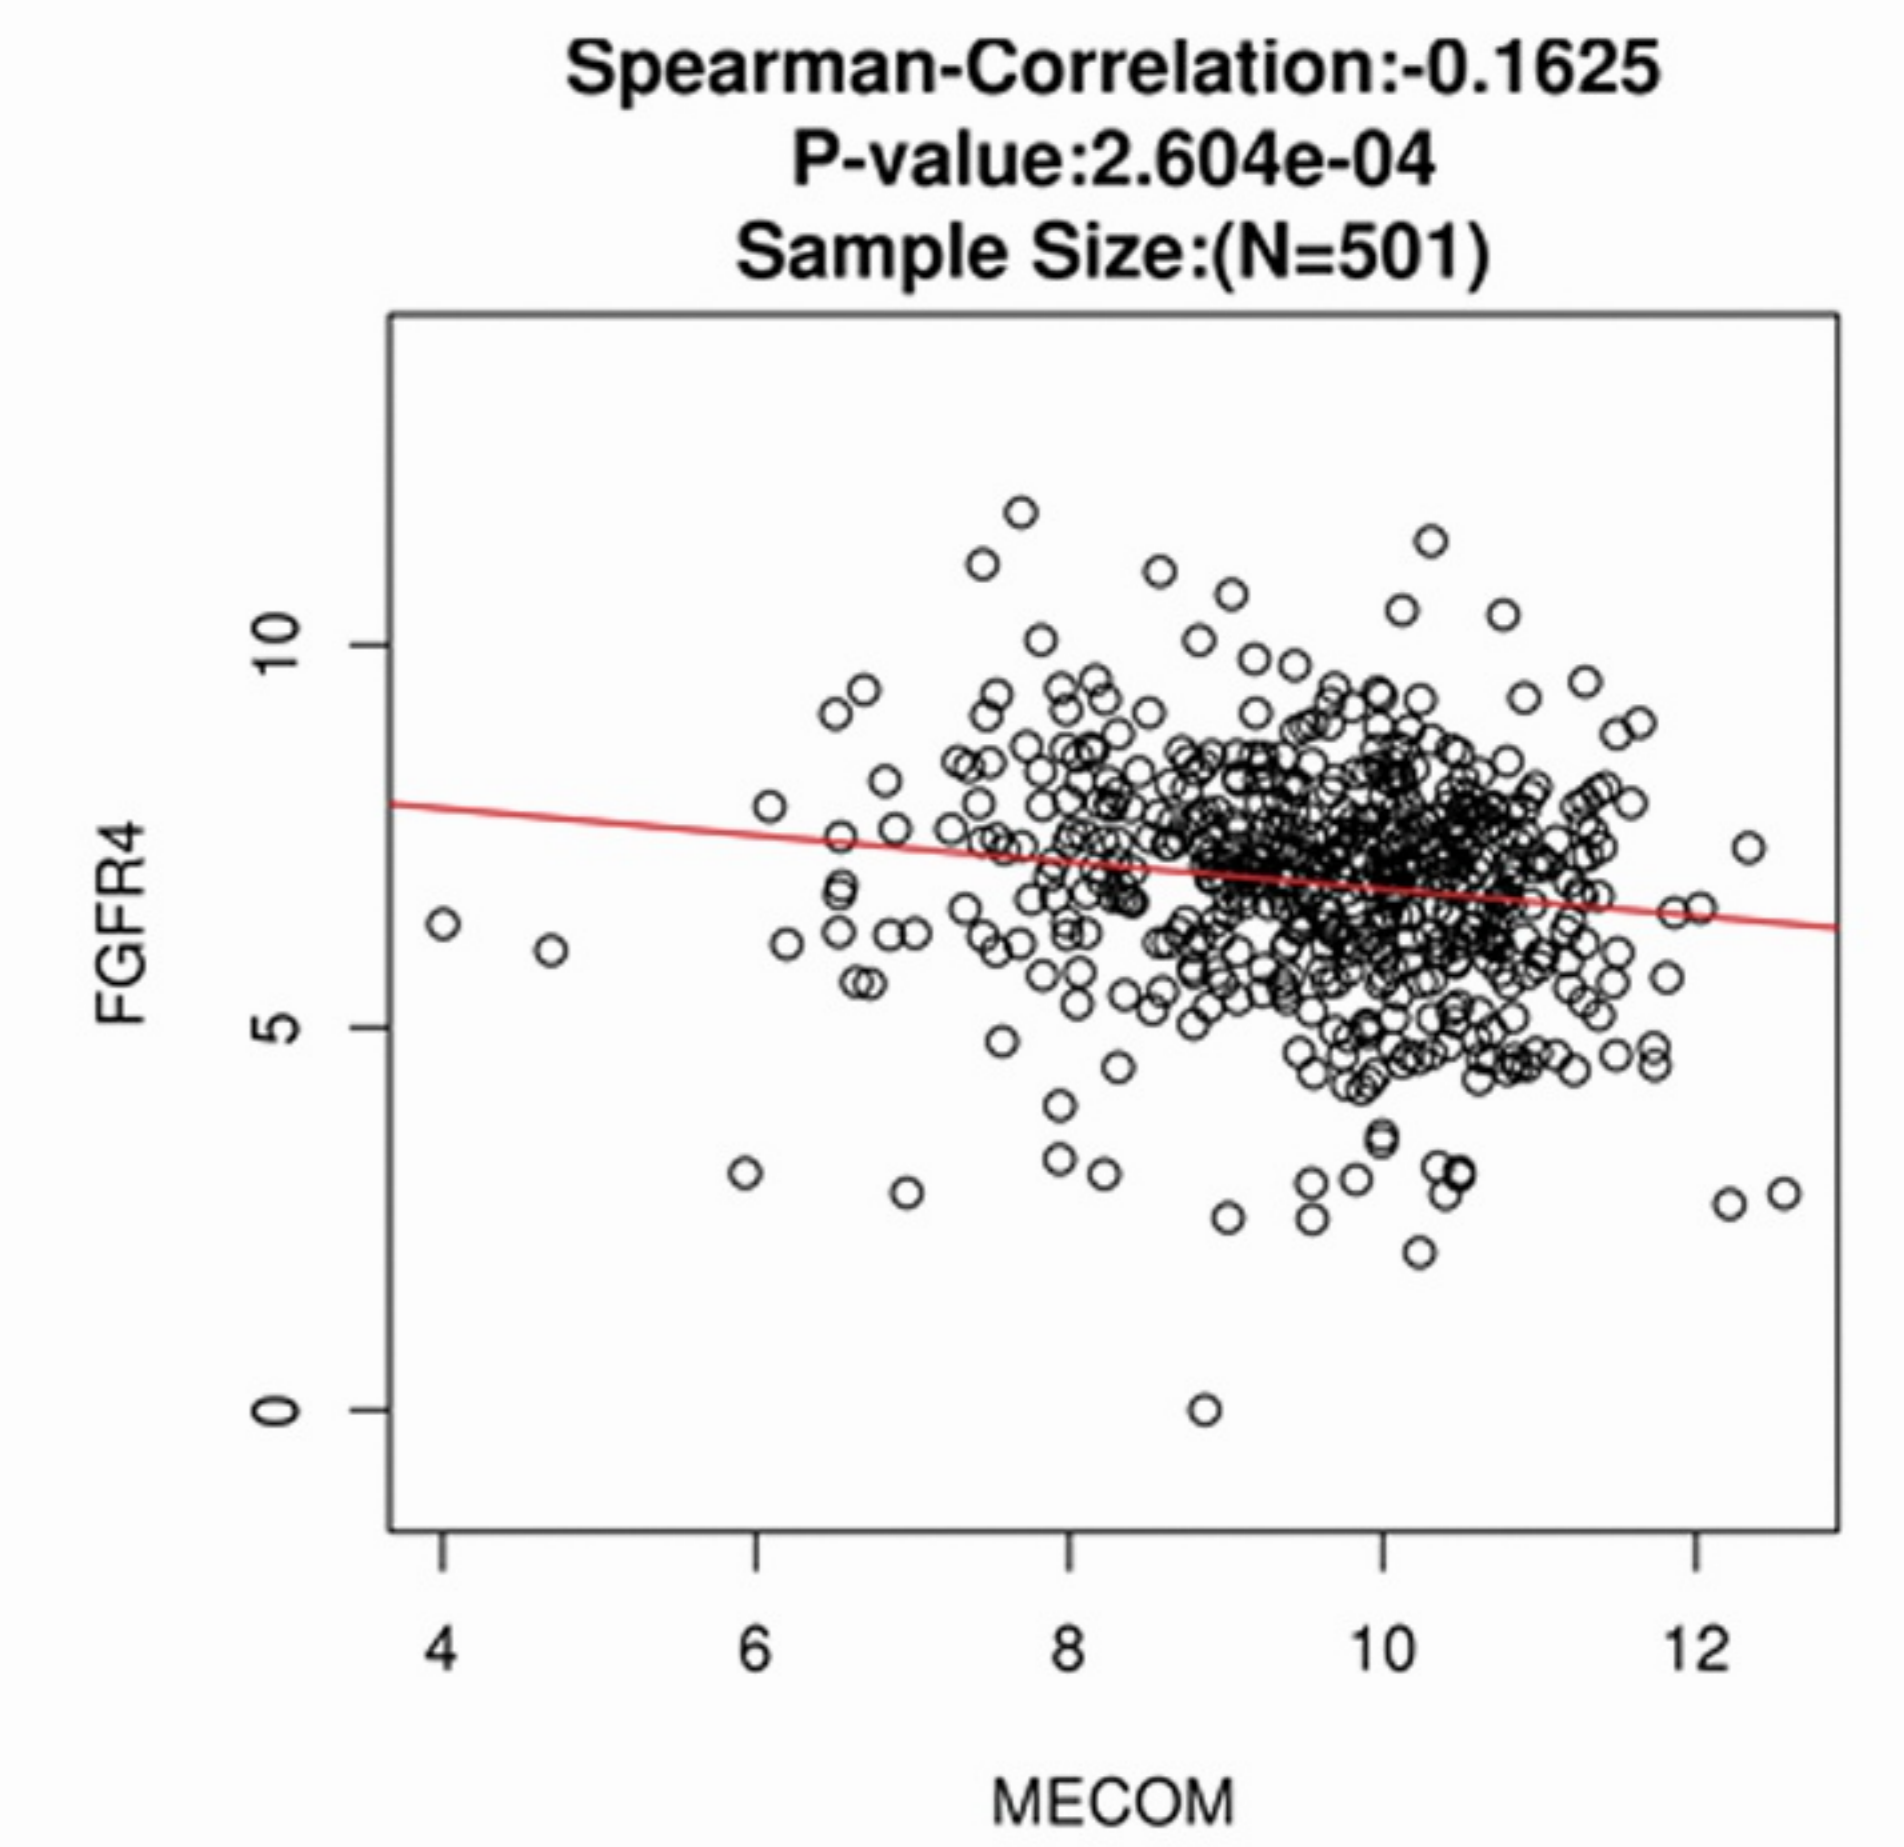

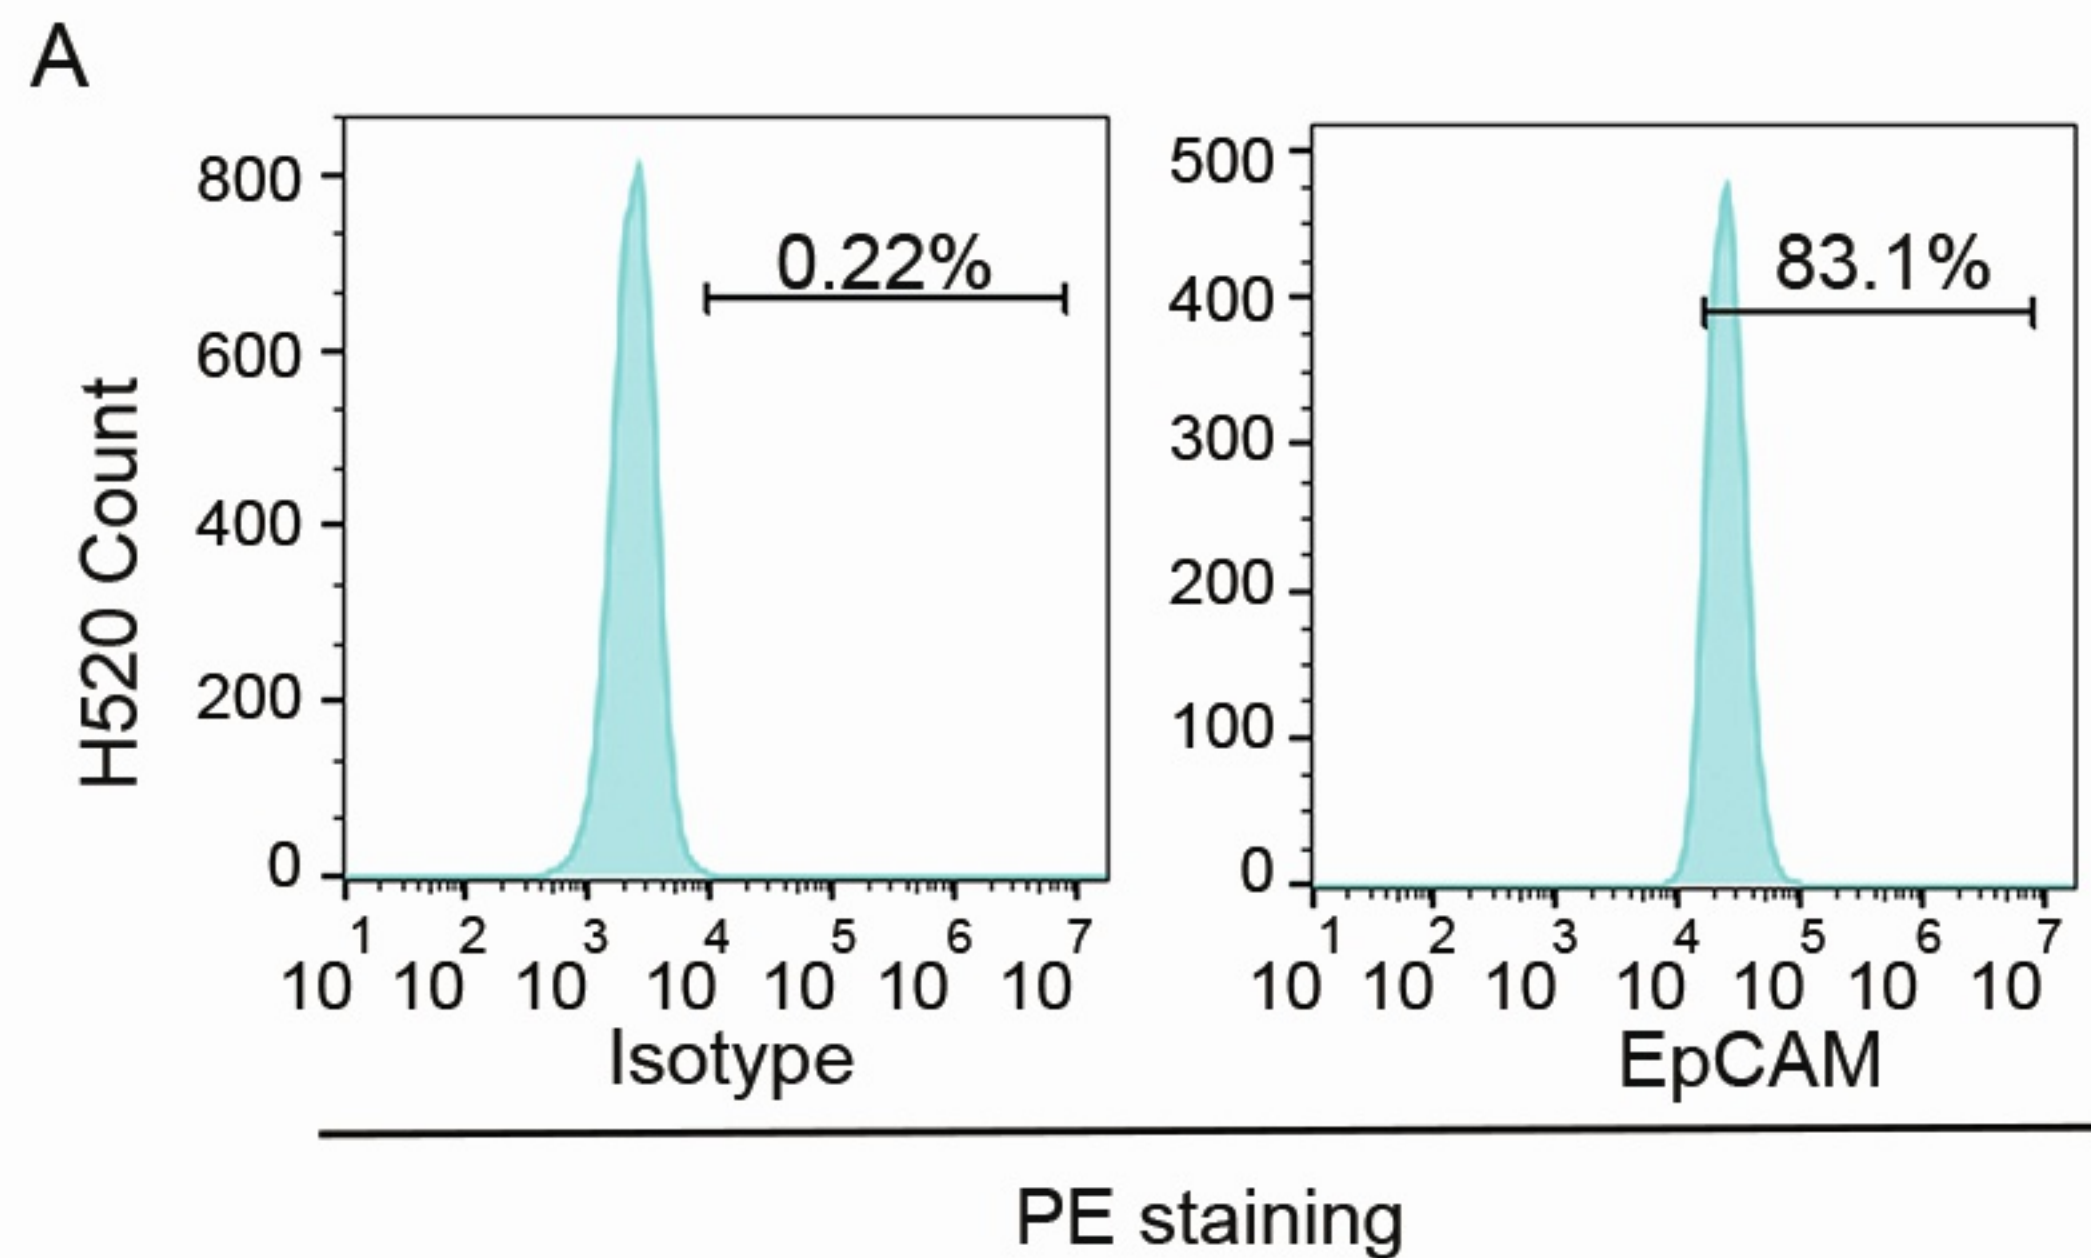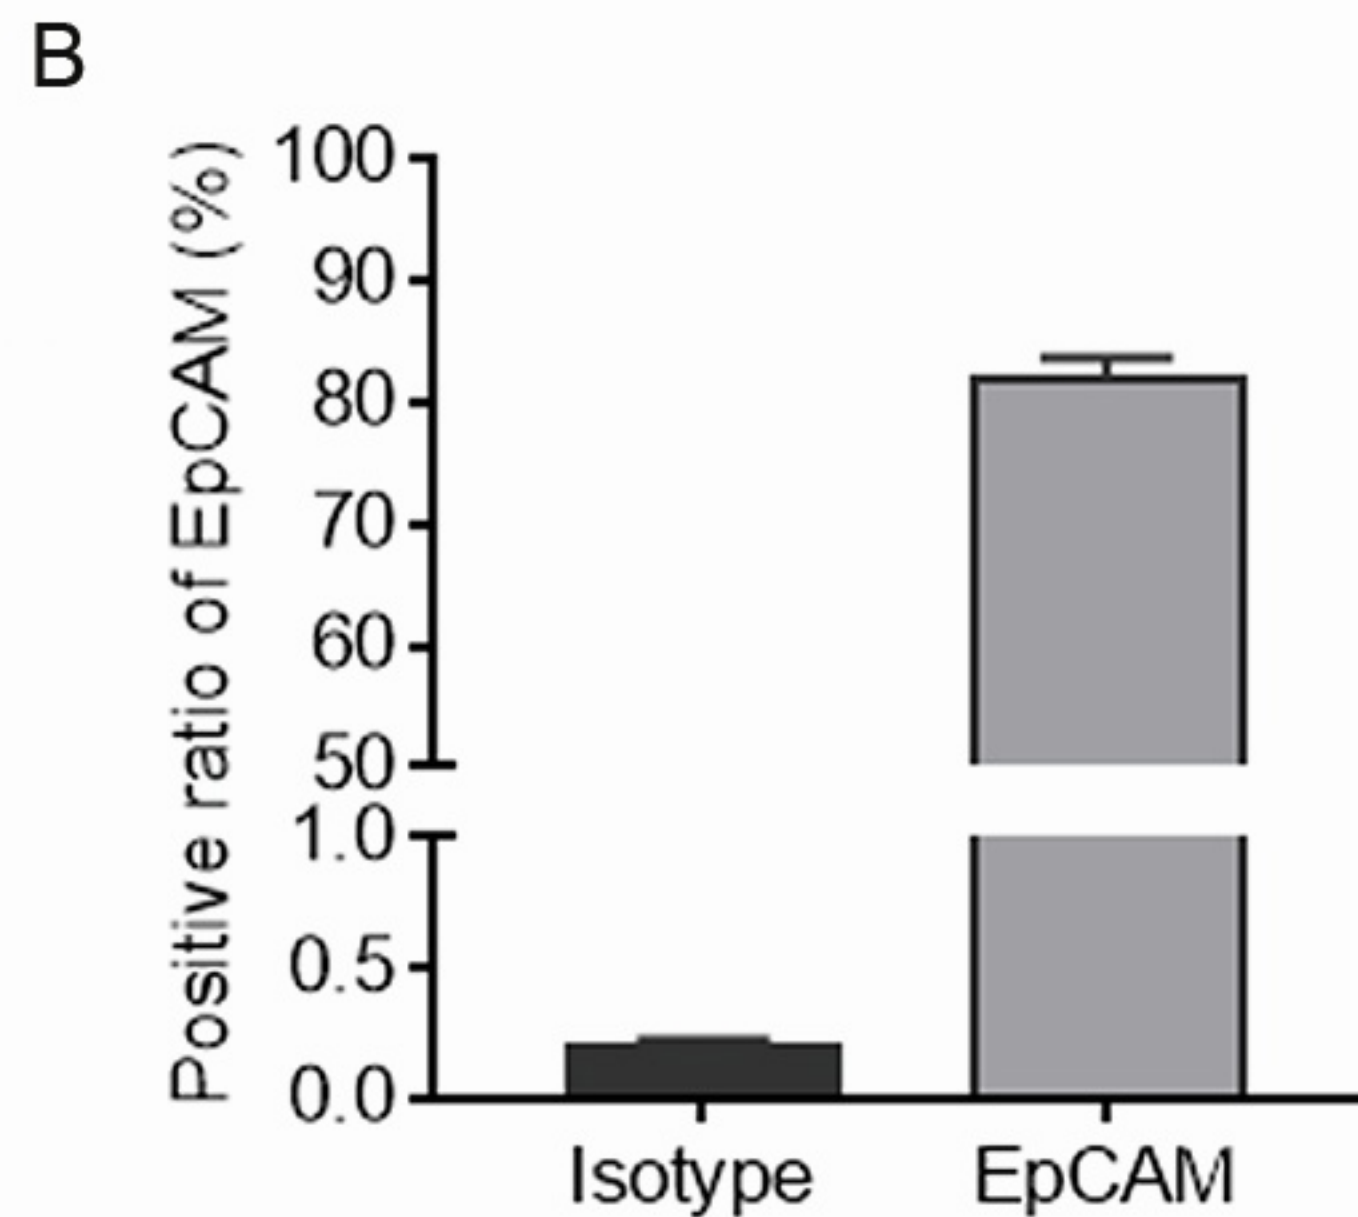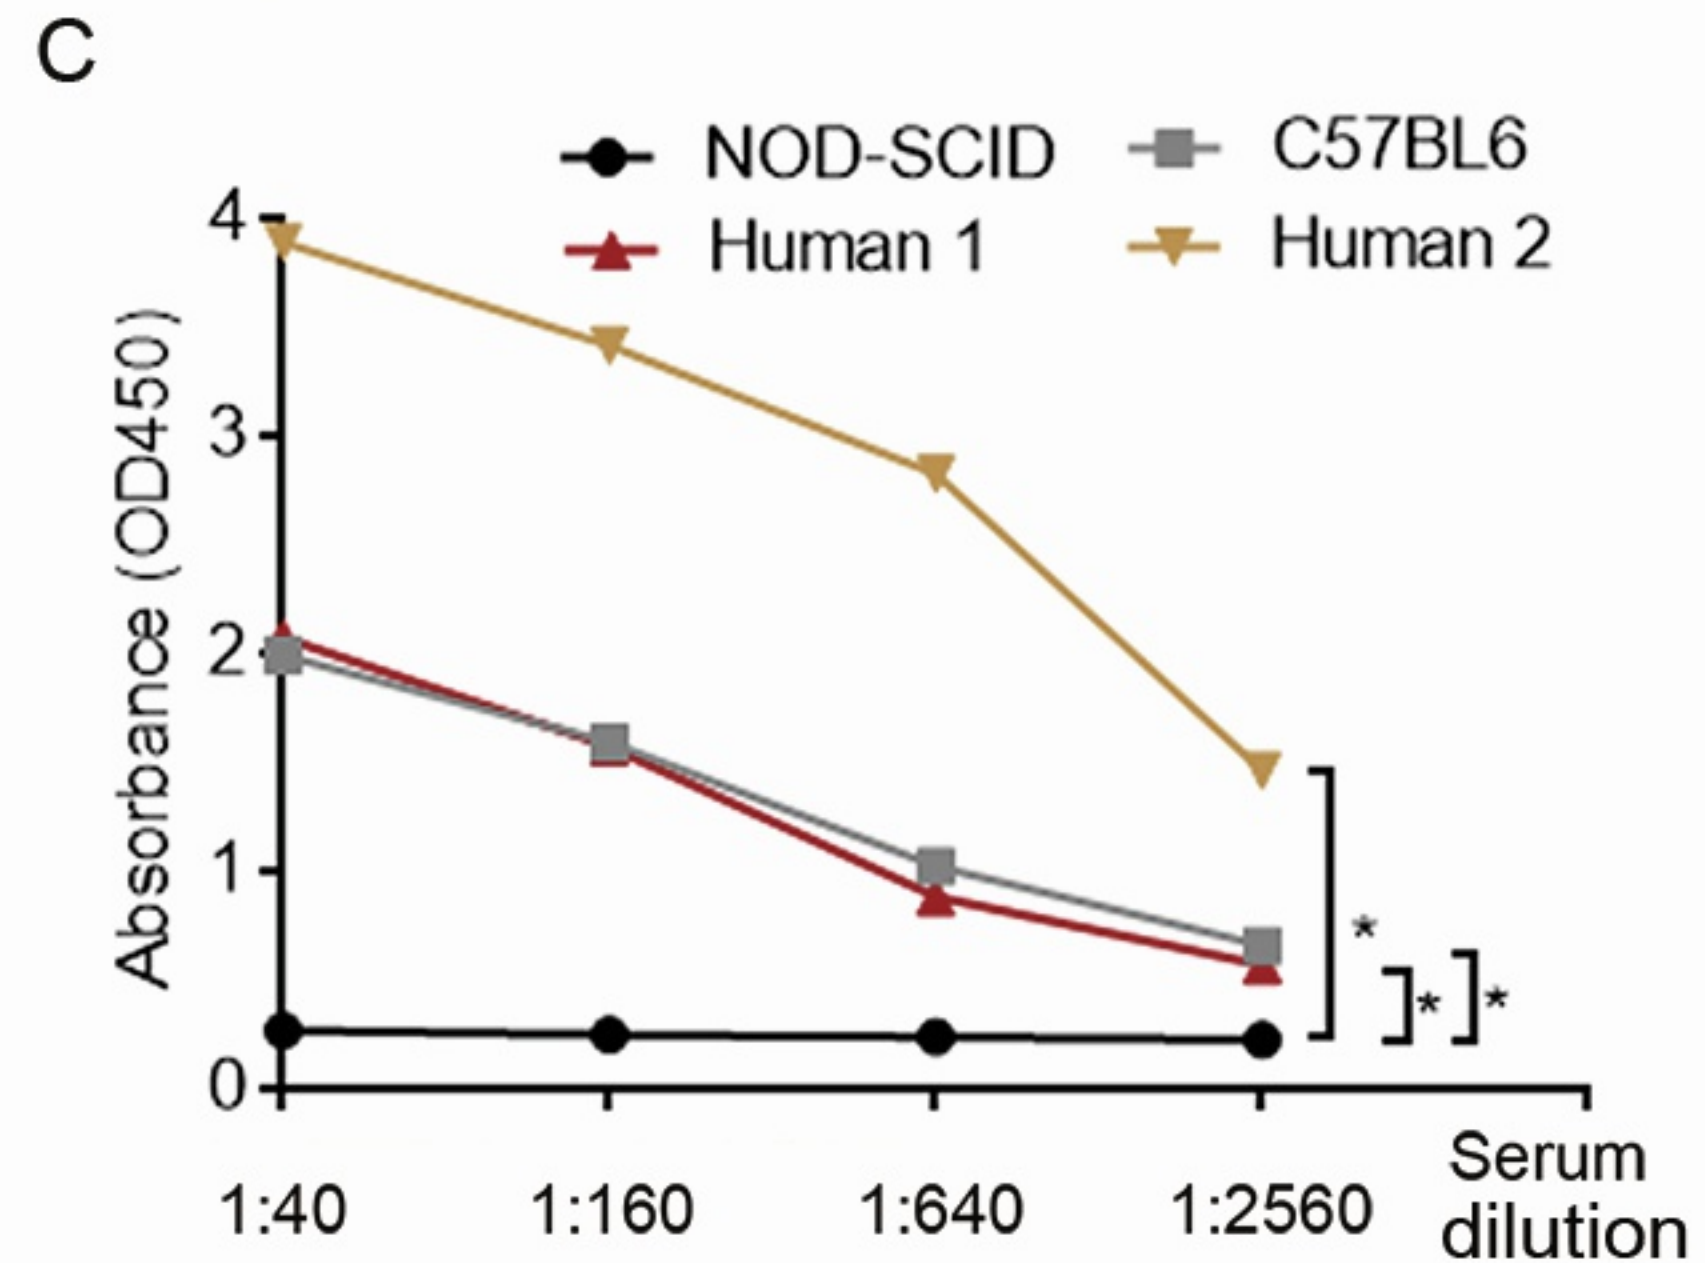

A

LUSC 021

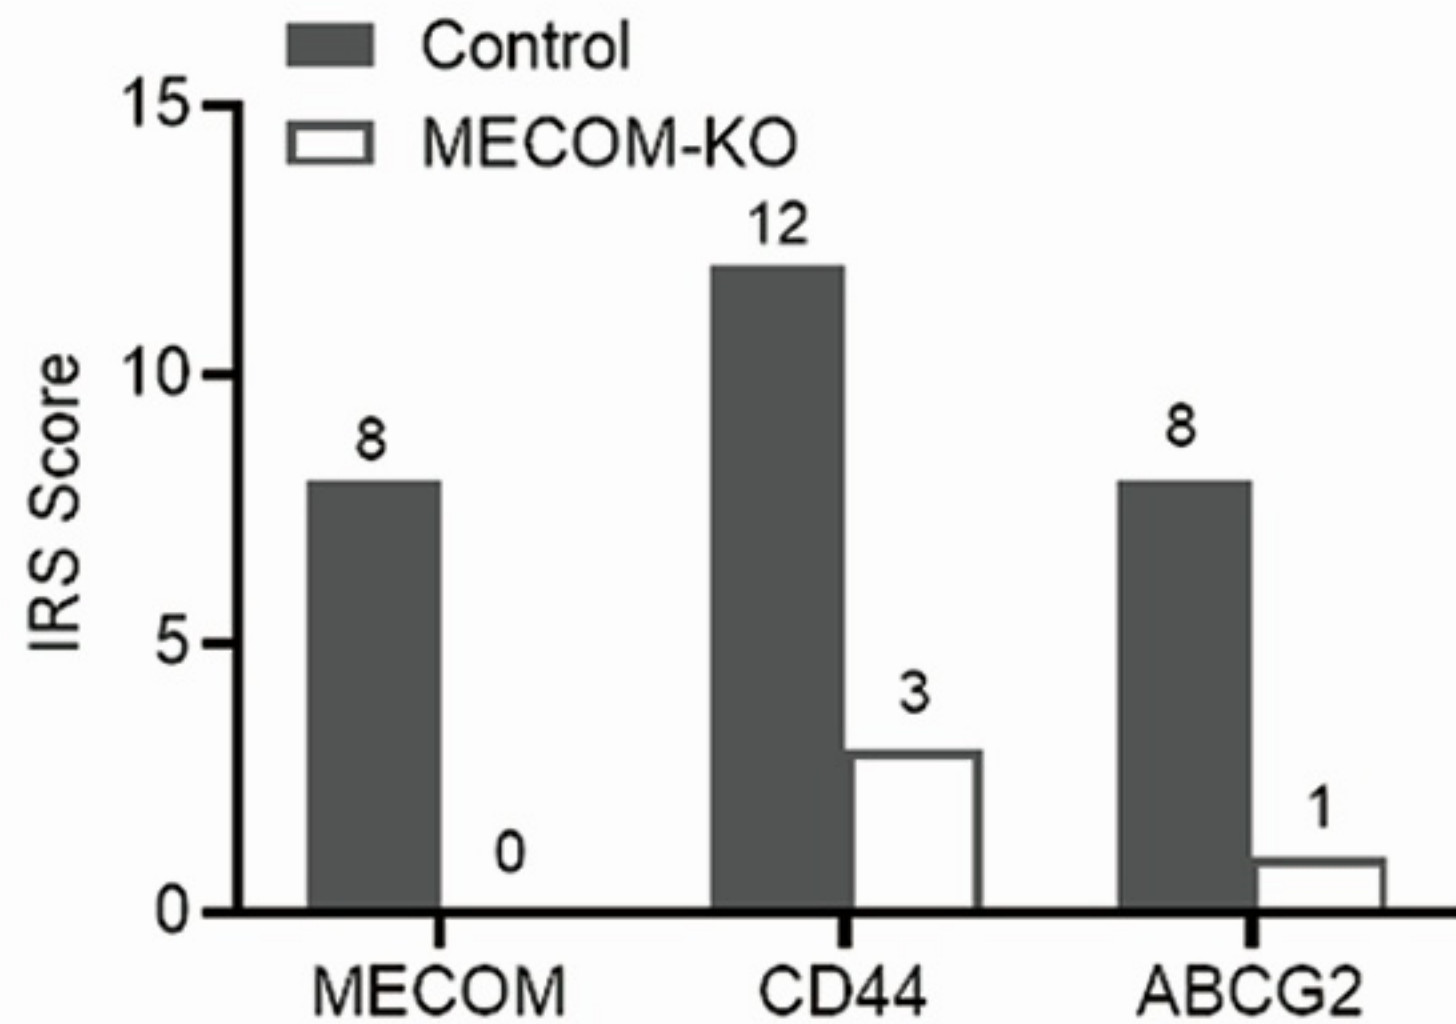

B

H520 tumors

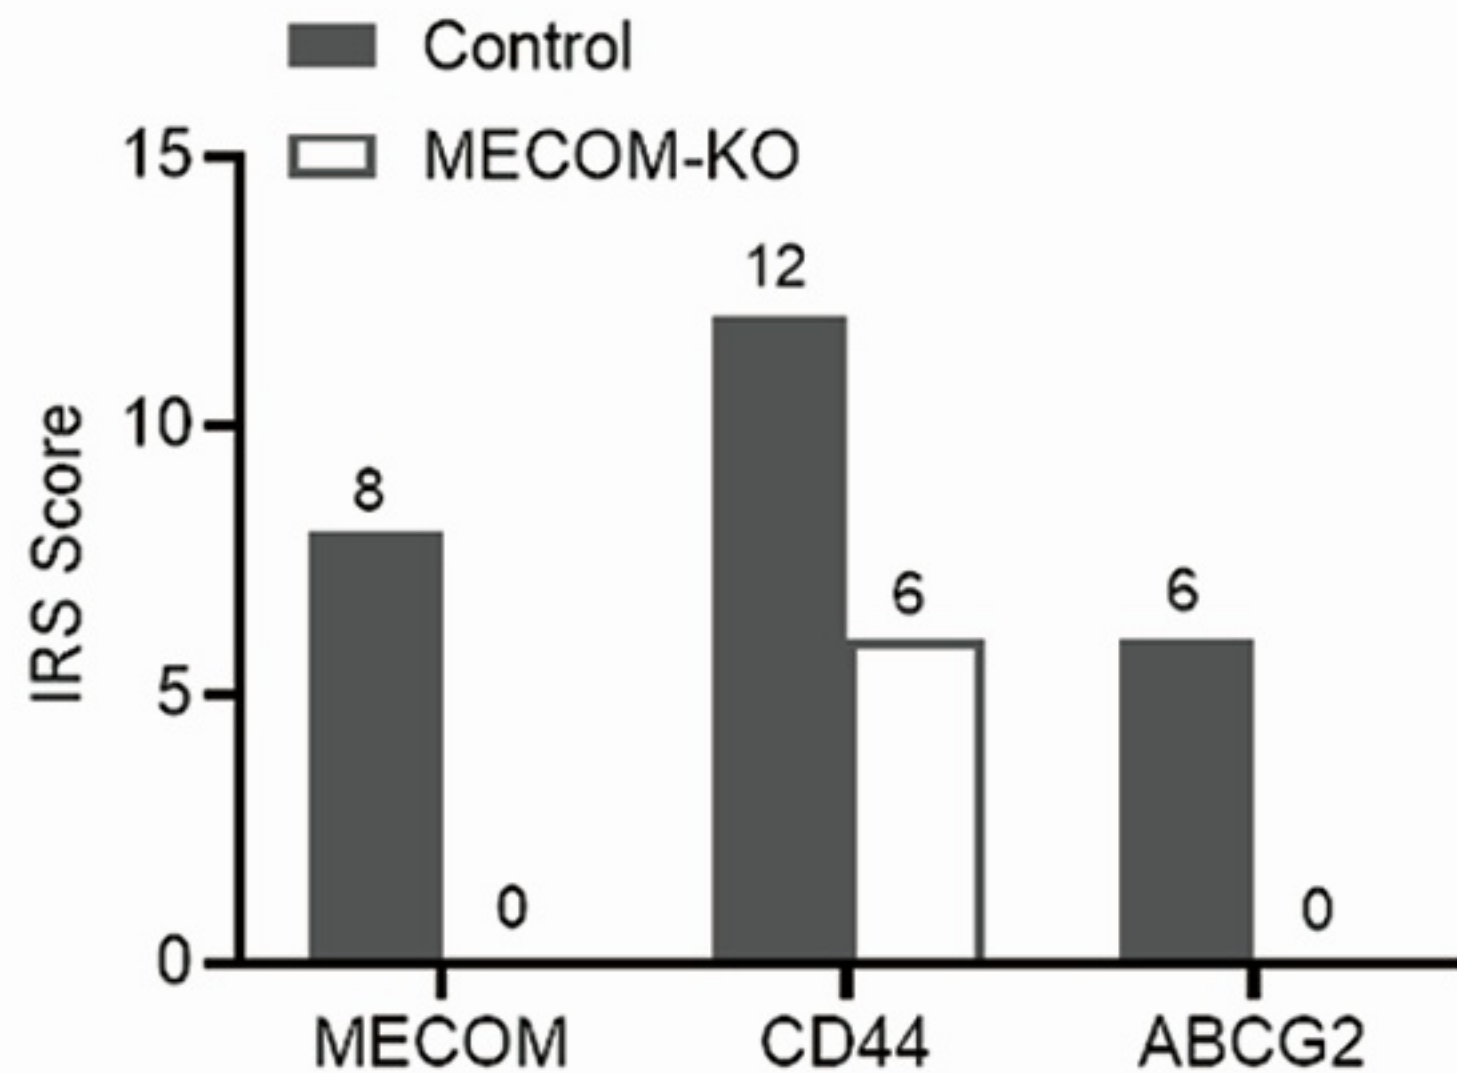

## SUPPLEMENTAL FIGURE LEGEND

**Figure S1. T7E1 analyses.** A specific sgRNA for 38 drive genes was inserted in the vector of pLEX\_305-CMV::SaCas9-2A-GFP;U6::BsaI-sgRNA which was further performed for lentivirus packaging. The lentivirus was transfected into the HEK293FT cells for 48 h. Then, the images of T7E1 assay in these HEK293FT cells were shown. The editing efficiencies were listed below the images.

**Figure S2. Kaplan-Meier survival curves of 10 candidate genes in LUSC.** The survival curves were analyzed in 524 LUSC cases using Kaplan-Meier plotter (<https://kmplot.com>).

**Figure S3. MECOM promotes proliferation and colony formation.**

(A) Western blots show MECOM and  $\beta$ -actin expression in H520, EBC-1 and SKMES-1 cell lines. The numerical value under the band shows densitometric analyses of MECOM, compared to this protein expressed in SKMES-1, which was normalized as “1.0”. (B) Proliferation curves of H520 and EBC-1 cells with MECOM overexpression (MECOM-OE). (C) Representative images (left panel) and efficiencies (right panel) of colony formation in H520 and EBC-1 cells with MECOM overexpression (MECOM-OE). (D) Western blots show MECOM and  $\beta$ -actin expression in several clones of SKMES-1 cells transfected with sg-MECOM. The numerical value under the band shows densitometric analyses of MECOM, compared to this protein expressed in the cells with sg-scramble, which was normalized as “1.0”. (E) Proliferation curves of SKMES-1 cells with MECOM depletion (sg-MECOM). (F) Representative images (left



panel) and efficiencies (right panel) of colony formation in SKMES-1 cells with MECOM depletion (sg-MECOM). \* $p < 0.05$ , unpaired two-tailed t-test.

**Figure S4. Correlation analyses in the tumor tissues of 501 cases of LUSC patients derived from public database of LinkedOmics.**

(<http://www.linkedomics.org/login.php>).

**Figure S5. EpCAM level and anti-ADV antibodies analysis. (A-B).**

The expression of EpCAM in H520 cells was analyzed by flow cytometry. Anti-human EpCAM labelled with phycoerythrin (Mitenyi Biotec, 130-113-826) was used. The positive ratio of this protein was respectively indicated by presentative images (A) and graph (B). (C) Abundance of anti-ADV antibodies in serum of NOD-SCID mice, C57BL/6N mice and two lung cancer patients by ELISA analyses. \*  $p < 0.05$ , unpaired two-tailed t-test.

**Figure S6. IRS score for immunohistochemistry.**

(A) Histogram shows IRS scores of MECOM, ABCG2 and CD44 expression in the ADV/protein treated tumors (LUSC 021) with MECOM depletion (MECOM-KO). (B) Histogram demonstrates IRS scores of MECOM, ABCG2 and CD44 expression in the ADV/protein treated tumors derived from H520 orthotopic xenograft with MECOM depletion (MECOM-KO).

**Table S1 SNVs and CNVs of 38 genes in the primary and corresponding PDX tumors of LUSC**

| Sample  |     | Primary tumor | PDX tumor | Common SNV/CNV in primary and PDX tumors | Ratio of consistency (%) <sup>*</sup> |
|---------|-----|---------------|-----------|------------------------------------------|---------------------------------------|
| LUSC012 | SNV | 18            | 27        | 18                                       | 100                                   |
| LUSC019 | SNV | 11            | 105       | 11                                       | 100                                   |
| LUSC021 | SNV | 5             | 14        | 5                                        | 100                                   |
| LUSC012 | CNV | 22            | 38        | 14                                       | 63.6                                  |
| LUSC019 | CNV | 36            | 38        | 36                                       | 100                                   |
| LUSC021 | CNV | 31            | 38        | 31                                       | 100                                   |

\* The ratio of consistency was calculated through dividing the common SNV/CNV number in both the primary and PDX tumors by the SNV/CNV number in the primary tumors.

**Table S2 SNVs in both primary and corresponding PDX tumors of LUSC**

| Sample ID | Entrez Gene ID | Gene Name | Gene description                                                        | Nucleotide | Amino acid | Exonic Funct |
|-----------|----------------|-----------|-------------------------------------------------------------------------|------------|------------|--------------|
| LUSC-012  | 27             | ABL2      | ABL proto-oncogene<br>2, non-receptor tyrosine kinase                   | c.889G>T   | p.G297C    | Missense     |
| LUSC-012  | 1301           | COL11A1   | collagen, type XI, alpha 1                                              | c.4715G>T  | p.G1572V   | Missense     |
| LUSC-012  | 1301           | COL11A1   | collagen, type XI, alpha 1                                              | c.1479G>T  | p.G493G    | Silent       |
| LUSC-012  | 1387           | CREBBP    | CREB binding protein                                                    | c.6903G>T  | p.M230I    | Missense     |
| LUSC-012  | 1786           | DNMT1     | DNA (cytosine-5-)-methyltransferase 1                                   | c.3152A>G  | p.Y1051C   | Missense     |
| LUSC-012  | 1786           | DNMT1     | DNA (cytosine-5-)-methyltransferase 1                                   | c.1770C>T  | p.P590P    | Silent       |
| LUSC-012  | 2033           | EP300     | E1A binding protein p300                                                | c.221C>T   | p.A74V     | Missense     |
| LUSC-012  | 2033           | EP300     | E1A binding protein p300                                                | c.754C>T   | p.P252S    | Missense     |
| LUSC-012  | 2911           | GRM1      | glutamate receptor, metabotropic 1                                      | c.1091G>T  | p.R364M    | Missense     |
| LUSC-012  | 9734           | HDAC9     | histone deacetylase 9                                                   | c.2048G>T  | p.R683L    | Missense     |
| LUSC-012  | 3645           | INSRR     | insulin receptor-related receptor                                       | c.2111C>A  | p.A704E    | Missense     |
| LUSC-012  | 3718           | JAK3      | Janus kinase 3                                                          | c.1639G>C  | p.E547Q    | Missense     |
| LUSC-012  | 5594           | MAPK1     | mitogen-activated protein kinase 1                                      | c.404G>A   | p.R135K    | Missense     |
| LUSC-012  | 5597           | MAPK6     | mitogen-activated protein kinase 6                                      | c.1426C>G  | p.L476V    | Missense     |
| LUSC-012  | 4851           | NOTCH1    | notch 1                                                                 | c.6142dupC | p.L2048fs  | Frame shift  |
| LUSC-012  | 5294           | PIK3CG    | phosphatidylinositol-4,5-bisphosphate 3-kinase, catalytic subunit gamma | c.1328G>T  | p.S443I    | Missense     |
| LUSC-012  | 25942          | SIN3A     | SIN3 transcription regulator family member A                            | c.3215A>T  | p.Q1072L   | Missense     |

|          |       |         |                                                                          |           |          |          |
|----------|-------|---------|--------------------------------------------------------------------------|-----------|----------|----------|
| LUSC-012 | 6935  | ZEB1    | zinc finger E-box binding homeobox 1                                     | c.601C>T  | p.R201C  | Missense |
| LUSC-019 | 9076  | CLDN1   | claudin 1                                                                | c.372G>T  | p.A124A  | Silent   |
| LUSC-019 | 1387  | CREBBP  | CREB binding protein                                                     | c.4336C>T | p.R1446C | Missense |
| LUSC-019 | 2033  | EP300   | E1A binding protein p300                                                 | c.7086G>C | p.G2362G | Silent   |
| LUSC-019 | 2263  | FGFR2   | fibroblast growth factor receptor 2                                      | c.1153G>T | p.G385W  | Missense |
| LUSC-019 | 2911  | GRM1    | glutamate receptor, metabotropic 1                                       | c.442C>A  | p.P148T  | Missense |
| LUSC-019 | 2918  | GRM8    | glutamate receptor, metabotropic 8                                       | c.335C>G  | p.A112G  | Missense |
| LUSC-019 | 4780  | NFE2L2  | nuclear factor, erythroid 2-like 2                                       | c.235G>C  | p.E79Q   | Missense |
| LUSC-019 | 4851  | NOTCH1  | notch 1                                                                  | c.1290C>G | p.I430M  | Missense |
| LUSC-019 | 91584 | PLXNA4  | plexin A4                                                                | c.3900C>A | p.I1300I | Silent   |
| LUSC-019 | 91584 | PLXNA4  | plexin A4                                                                | c.2636G>A | p.R879Q  | Missense |
| LUSC-019 | 6615  | SNAI1   | snail family zinc finger 1                                               | c.521G>A  | p.R174Q  | Missense |
| LUSC-021 | 2263  | FGFR2   | fibroblast growth factor receptor 2                                      | c.1995G>T | p.R665R  | Silent   |
| LUSC-021 | 3815  | KIT     | v-kit Hardy-Zuckerman 4 feline sarcoma viral oncogene homolog            | c.2055A>T | p.K685N  | Missense |
| LUSC-021 | 5156  | PDGFR A | platelet-derived growth factor receptor, alpha polypeptide               | c.3070G>T | p.D1024Y | Missense |
| LUSC-021 | 5294  | PIK3CG  | phosphatidylinositol -4,5-bisphosphate 3-kinase, catalytic subunit gamma | c.159C>A  | p.S53R   | Missense |
| LUSC-021 | 6935  | ZEB1    | zinc finger E-box binding homeobox 1                                     | c.1079C>T | p.T360I  | Missense |

**Table S3 CNVs in both primary and corresponding PDX tumors of LUSC**

| <b>Sample</b> | <b>LUSC 012</b>  | <b>LUSC 019</b> | <b>LUSC 021</b> |
|---------------|------------------|-----------------|-----------------|
| ABL2          | 1.32192809488736 | 1.321928095     | 0.584962501     |
| BRAF          | 0.584962501      | 1               | 0.584962501     |
| CLDN1         | 1                | 2.169925001     | 1.807354922     |
| CREBBP        |                  | 1               | 0.584962501     |
| CSF2RB        |                  | 1.321928095     |                 |
| DNMT1         |                  | 1               | 0.584962501     |
| DNMT3B        |                  | 1               | 0.584962501     |
| EGFR          |                  | 1               | 0.584962501     |
| EP300         |                  | 1.321928095     |                 |
| ERBB2         |                  | 1               | 1               |
| ERBB4         |                  | 0.584962501     |                 |
| FGFR2         |                  | 0.584962501     | 0.584962501     |
| FLT3          |                  | 0.584962501     |                 |
| GLI3          |                  | 1               | 0.584962501     |
| GRM1          |                  |                 | 0.584962501     |
| GRM8          | 0.584962501      | 1               | 0.584962501     |
| HDAC9         |                  | 1               | 0.584962501     |
| INSRR         | 1.321928095      | 1.321928095     | 0.584962501     |
| ITGB4         | 0.584962501      | 1               | 1               |
| JAK3          |                  | 1               | 0.584962501     |
| KIT           |                  | 1               | 0.584962501     |
| MAPK1         |                  | 1.321928095     |                 |
| MAPK6         |                  | 1               | 1               |
| MECOM         | 1                | 2.169925001     | 1.807354922     |
| MET           | 0.584962501      | 1               | 0.584962501     |
| NFE2L2        |                  | 0.584962501     |                 |
| NOTCH1        |                  | 0.584962501     | 0.584962501     |
| PDGFRA        |                  | 1               | 0.584962501     |
| PIK3CA        | 1                | 2.169925001     | 1.807354922     |
| PIK3CG        | 0.584962501      | 0.584962501     | 0.584962501     |
| PLXNA4        | 0.584962501      | 1               | 0.584962501     |
| RGS5          | 1.321928095      | 1.321928095     | 1.807354922     |
| RHPN2         |                  | 1               | 1.807354922     |
| RIT1          | 1.321928095      | 1.321928095     | 0.584962501     |
| SIN3A         |                  |                 | 1               |
| SNAI1         | 0.584962501      | 1               | 0.584962501     |
| ZEB1          |                  | 0.584962501     | 0.584962501     |

The copy number log-ratio of total sequence read count in the tumor to that in the normal, which is provided by the software facets.

**Table S4 CNVs and SNVs frequencies of 10 genes in TCGA database**

| Gene name | 501 cases of LUSC in TCGA database* |         |
|-----------|-------------------------------------|---------|
|           | CNV<br>(Amplification, %)           | SNV (%) |
| PLXNA4    | 41.72                               | 10.67   |
| PIK3CG    | 46.91                               | 8.99    |
| CREBBP    | 16.17                               | 8.43    |
| HDAC9     | 51.50                               | 7.87    |
| GRM8      | 42.51                               | 7.30    |
| MECOM     | 89.82                               | 5.06    |
| ITGB4     | 47.50                               | 4.49    |
| BRAF      | 42.71                               | 4.49    |
| MET       | 44.51                               | 2.25    |
| SNAI1     | 52.89                               | 2.25    |

\*LUSC indicates the CNV/SNV of 501 cases of squamous cell lung cancer in TCGA database.

**Table S5 MECOM amplification in the primary and corresponding PDX tumors of LUSC**

| Samples  | MECOM CNV<br>(amplification) |
|----------|------------------------------|
| LUSC 006 | 0.584962501                  |
| LUSC 012 | 1                            |
| LUSC 018 | 1.321928095                  |
| LUSC 019 | 2.169925001                  |
| LUSC 021 | 1.807354922                  |

The copy number log-ratio of total sequence read count in the tumor to that in the normal, which is provided by the software facets.

**Table S6 Univariate and multivariate cox regression analyses for disease-free survival in LUSC with MECOM staining (n=150)**

| Characteristic                 | Frequency (%) | Univariable analysis |         | Multivariable analysis |         |
|--------------------------------|---------------|----------------------|---------|------------------------|---------|
|                                |               | HR (95% CI)          | P value | HR (95% CI)            | P value |
| <b>Age group, y</b>            |               |                      |         |                        |         |
| <60                            | 17/63 (27.0)  | 1                    | 0.077   | 1                      | 0.022   |
| ≥60                            | 34/87 (39.1)  | 1.729 (0.941-3.176)  |         | 2.060 (1.111-3.819)    |         |
| <b>Sex</b>                     |               |                      |         |                        |         |
| Female                         | 4/11 (36.4)   | 1                    | 0.812   | -                      | -       |
| Male                           | 47/139 (33.8) | 0.883 (0.318-2.457)  |         | -                      |         |
| <b>Smoking history</b>         |               |                      |         |                        |         |
| No                             | 5/11 (45.5)   | 1                    | 0.874   | -                      | -       |
| Yes                            | 46/139 (33.1) | 0.920 (0.331-2.560)  |         | -                      |         |
| <b>Lymphovascular invasion</b> |               |                      |         |                        |         |
| No                             | 42/132 (31.8) | 1                    | 0.126   | -                      | -       |
| Yes                            | 9/18 (50.0)   | 1.760 (0.854-3.629)  |         | -                      |         |
| <b>Differentiation</b>         |               |                      |         |                        |         |
| Well                           | 23/80 (28.8)  | 1                    | 0.112   | -                      | -       |
| Poorly                         | 28/70 (40.0)  | 1.599 (0.896-2.852)  |         | -                      |         |
| <b>TNM Stage</b>               |               |                      |         |                        |         |
| I                              | 18/83 (21.7)  | 1                    | 0.001   | 1                      | <0.001  |
| II and III                     | 33/67 (49.3)  | 2.696 (1.507-4.823)  |         | 3.259 (1.803-5.890)    |         |
| <b>MECOM</b>                   |               |                      |         |                        |         |
| Low expression                 | 9/43 (20.9)   | 1                    | 0.022   | 1                      | 0.031   |
| High expression                | 42/107 (39.3) | 2.466 (1.108-5.489)  |         | 2.632 (1.179-5.873)    |         |



**Table S7 Univariate and multivariate cox regression analyses for overall survival in LUSC with MECOM staining (n=150)**

| Characteristic                 | Frequency (%) | Univariable analysis |         | Multivariable analysis |         |
|--------------------------------|---------------|----------------------|---------|------------------------|---------|
|                                |               | HR (95% CI)          | P value | HR (95% CI)            | P value |
| <b>Age group, y</b>            |               |                      |         |                        |         |
| <60                            | 9/63 (14.3)   | 1                    | 0.036   | 1                      | 0.010   |
| ≥60                            | 25/87 (28.7)  | 2.260 (1.055-4.843)  |         | 2.829 (1.289-6.208)    |         |
| <b>Sex</b>                     |               |                      |         |                        |         |
| Female                         | 1/11 (9.1)    | 1                    | 0.302   | -                      | -       |
| Male                           | 33/139 (23.7) | 2.851 (0.390-20.845) |         | -                      |         |
| <b>Smoking history</b>         |               |                      |         |                        |         |
| No                             | 3/11 (27.3)   | 1                    | 0.776   | -                      | -       |
| Yes                            | 31/139 (22.3) | 0.842 (0.257-2.755)  |         | -                      |         |
| <b>Lymphovascular invasion</b> |               |                      |         |                        |         |
| No                             | 25/132 (18.9) | 1                    | 0.003   | 1                      | 0.051   |
| Yes                            | 9/18 (50.0)   | 3.135 (1.462-6.724)  |         | 2.288 (0.995-5.264)    |         |
| <b>Differentiation</b>         |               |                      |         |                        |         |
| Well                           | 12/80 (15.0)  | 1                    | 0.009   | 1                      | 0.010   |
| Poorly                         | 22/70 (31.4)  | 2.698 (1.277-5.703)  |         | 2.807 (1.282-6.146)    |         |
| <b>TNM Stage</b>               |               |                      |         |                        |         |
| I                              | 13/83 (15.7)  | 1                    | 0.027   | 1                      | 0.018   |
| II, III                        | 21/67 (31.3)  | 2.183 (1.093-4.361)  |         | 2.483 (1.171-5.268)    |         |
| <b>MECOM</b>                   |               |                      |         |                        |         |
| Low expression                 | 4/43 (9.3)    | 1                    | 0.024   | 1                      | 0.046   |
| High expression                | 30/107 (28.0) | 3.113 (1.096-8.836)  |         | 2.931 (1.021-8.412)    |         |

**Table S8. Primers of T7E1-PCR, qRT-PCR, and ChIP**

|              | <b>Name</b>           | <b>Primer (5'→3')</b>  |
|--------------|-----------------------|------------------------|
| T7E1-PCR     | ABL2 Forward          | ACTTAACTCTGCCTATAACACA |
|              | ABL2 Reverse          | GAGTCTCGCTCTATTGCC     |
|              | BRAF Forward          | CTCCCCATTTAATTTACAGA   |
|              | BRAF Reverse          | AGTTTGCCTTATCTAACCC    |
|              | CLDN1 Forward         | CTGTATATTGGGTTACCAGC   |
|              | CLDN1 Reverse         | ACTTCCTCCTTAGCGTTT     |
|              | COL11A1 Forward       | CTGCCTTTCACTTTAACTCA   |
|              | COL11A1 Reverse       | CAAAGGGACTATAATGCGAT   |
|              | CREBBP Forward        | CCCACATTGATGCCGTTT     |
|              | CREBBP Reverse        | TTTAAGACATGCCTATGAGT   |
|              | CSF2RB Forward        | ACCCCGGCAGACATGAACACA  |
|              | CSF2RB Reverse        | CCCCTCCCAGACACGTCCACA  |
|              | DNMT1 Forward         | TACATTCTCTCATTGCCTC    |
|              | DNMT1 Reverse         | CATCACAATGACTTGGCCTA   |
|              | DNMT3B Forward        | TCTTGCTTCTAGGTCCGAAC   |
|              | DNMT3B Reverse        | GAAATGTTGCCATACCCGCTA  |
|              | EGFR Forward          | CTCATTATCACAGGGGTCA    |
|              | EGFR Reverse          | TTATTCACTGCCTACACAC    |
|              | EP300 Forward         | ACAAAATTTAGCTCGGTGT    |
|              | EP300 Reverse         | TAGGCATTATCCCTTGTC     |
|              | ERBB2 Forward         | GCTACGTGCTCATCGCTCA    |
|              | ERBB2 Reverse         | GACGCAAGCTACAACCTCC    |
|              | ERBB4 Forward         | ATAAAATTCCTTCACGCACA   |
|              | ERBB4 Reverse         | ATCTTGAAACTCTAAAGGCA   |
|              | FGFR2 Forward         | GAAAACCACCCCTAAATGCAA  |
|              | FGFR2 Reverse         | CAAGGCAGTTTTTCTTATCCCT |
|              | FLT3 Forward          | AATCCGCAATTTTCTAGGGAG  |
|              | FLT3 Reverse          | TTTTGTGCATCTTTGTTGCT   |
|              | GLI3 Forward          | TGCCTTGAATCAGACGTT     |
|              | GLI3 Reverse          | TCGCTAACTCAAATAGTGT    |
|              | GRM1 Forward          | TATCTGGCTACTTCTATGGGA  |
|              | GRM1 Reverse          | CTTTGGATCTCTAGCCCTG    |
|              | GRM8 Forward          | AGCCAGGTGTTTCAGAATCACA |
|              | GRM8 Reverse          | CATTAGCACACTTCACATCCG  |
|              | HDAC9 Forward         | GCTGAATGAAAATTAGCCTA   |
|              | HDAC9 Reverse         | CACAATTCCTTCAAGCCAT    |
|              | INSRR Forward         | CGGCCACAGTCCTTGTCCCTC  |
|              | INSRR Reverse         | CCCCACCCTCCCTACACTCAC  |
|              | ITGB4 Forward         | AGAGCAGCTTCCAAATCACA   |
|              | ITGB4 Reverse         | ACCGAGATTCTTCCCTTGAGA  |
| JAK3 Forward | AGATAGTGTGTTGCATCCCTT |                        |
| JAK3 Reverse | CGAAGCCCCACTTGTTCAGC  |                        |

|                |                        |
|----------------|------------------------|
| KIT Forward    | CAGATAGGTTAGCACCAT     |
| KIT Reverse    | ACGGTATCAACAATAGCTT    |
| MAPK1 Forward  | ATGCTTCTTAAAGTGTGCTC   |
| MAPK1 Reverse  | CAAACCTCTCAACGCAGAGG   |
| MAPK6 Forward  | CAAACATGCTCTACGTGA     |
| MAPK6 Reverse  | AAAGTTGAAATAGCATCCCC   |
| MECOM Forward  | TTGAAAATGGAACCCCAA     |
| MECOM Reverse  | CATTTAAGTACCCACGCAT    |
| MET Forward    | ATCCTTGCCATTATCCTC     |
| MET Reverse    | CATTGTTTGGCTTTCAGTC    |
| NFE2L2 Forward | GTCCAGAAGCCAAACTGA     |
| NFE2L2 Reverse | TATATCCC GAATTAATGCAA  |
| NOTCH1 Forward | TTTCCCCAGCCTCCATGCCTT  |
| NOTCH1 Reverse | GGGCACTCGCACTGGA ACTCA |
| PDGFRA Forward | ATGTAGCCTTTGTACCTC     |
| PDGFRA Reverse | TTAATCTAGGCATCTAACCC   |
| PIK3CA Forward | GAATTATTACTACTTAGCCTA  |
| PIK3CA Reverse | ATCTTTTCTTCACGGTTG     |
| PIK3CG Forward | CTGCTGATAGACCACCGTTT   |
| PIK3CG Reverse | ATCATCGTCCTCCAAGCTCT   |
| PLXNA4 Forward | CAATTTCTTGACGCTCCC     |
| PLXNA4 Reverse | CACAAGCCCAAATTGAACACA  |
| RGS5 Forward   | CCAGCTCATCAAACCCAA     |
| RGS5 Reverse   | TGATGCACTGGTATTAGCTT   |
| RHPN2 Forward  | CCAGAGTTTACGATGCCAGT   |
| RHPN2 Reverse  | TCCCCAGTGATACAACGAG    |
| RIT1 Forward   | CTTGTCCTACTGTGCCGAGA   |
| RIT1 Reverse   | CTCACAGTTACAGAGCGAGT   |
| SIN3A Forward  | GTTTTGTAGTGCATCCCT     |
| SIN3A Reverse  | GAAACAGCCCAATAGTCCA    |
| SNAI1 Forward  | CCATCACTGCCAGCCGTTG    |
| SNAI1 Reverse  | TCAGCCTTTGTCTGTAGCTC   |
| ZEB1 Forward   | TAATGTAATAAGGCAAGTGT   |
| ZEB1 Reverse   | CTCTTCTGCACTTG GTTG    |

---

|         |               |                       |
|---------|---------------|-----------------------|
| qRT-PCR | MECOM Forward | AAGAGAAGCCATTTAAGTGTC |
|         | MECOM Reverse | ATCCAGAATCGCACCTGT    |
|         | FGFR3 Forward | CCCCTCCCTCCATCTCCT    |
|         | FGFR3 Reverse | GCTGCCAAACTTGTTCTCCAC |
|         | FGFR4 Forward | GCATTGGAGGCATTCGG     |
|         | FGFR4 Reverse | CACGGCTGTGGTGTGG      |
|         | FZD4 Forward  | TCCCACCACAGAACGAC     |
|         | FZD4 Reverse  | AAGCCAGCATCATAGCC     |
|         | GLI1 Forward  | TTCCTACCAGAGTCCCAAGT  |
|         | GLI1 Reverse  | CCCTATGTGAAGCCCTATTT  |

|                |                           |
|----------------|---------------------------|
| JAK3Forward    | TCCTTCCGAGCCGTCAT         |
| JAK3 Reverse   | TCGCCTAGCGGGTCATAG        |
| MAPK3Forward   | GGGGAGGTGGAGATGGTGA       |
| MAPK3 Reverse  | CTGGCAGTAGGTCTGATGTTCCG   |
| MAPK13Forward  | CTCACCCATCCCTTCTTTG       |
| MAPK13 Reverse | TGTGCTGCTTCCATTCATC       |
| MEIS1Forward   | ACACCCTTACCCTTCTGA        |
| MEIS1 Reverse  | CTTACTGCTCGGTTGGA         |
| SOX2 Forward   | CCCCTGTGGTTACCTCTTCCT     |
| SOX2 Reverse   | CCGTTAATGGCCGTGCC         |
| TCF7L1Forward  | GTCAACGAGTCGGAGAACCA      |
| TCF7L1 Reverse | TCTCACTTCGGCGAAATAGTC     |
| WNT3AForward   | TCCACGCCATTGCCTCAG        |
| WNT3A Reverse  | CACCATCCCACCAAACCTCG      |
| WNT4 Forward   | AGCGGAACCTGGAAGTCAT       |
| WNT4 Reverse   | GAGTCCCTTGCGTCACCA        |
| SaCas9 Forward | GCAACAAACTGAACGCCCAT      |
| SaCas9 Reverse | TCCAGATTCTTCACGGTCAC      |
| hActin Forward | TTAGTTGCGTTACACCCTTT      |
| hActin Reverse | ACCTTCACCGTTCCAGTTT       |
| mActin Forward | CCATCCAGGCTGTGCTGTCCCTGTA |
| mActin Reverse | ACGCACGATTTCCCTCTCAGCTGTG |

---

|      |                       |                   |
|------|-----------------------|-------------------|
| ChIP | SOX2-promoter Forward | GTCTGGGAACATAAACA |
|      | SOX2-promoter Reverse | AAGATAACTGGGAGGAT |

---

**Table S9 Amino acid sequences for adaptor (CFS) and protector (HF)**

| <b>Protein name</b> | <b>Amino acid sequences</b>                                                                                                                                                                                                                                                                                                                                                                                                                                                                                                                                                                                                                                |
|---------------------|------------------------------------------------------------------------------------------------------------------------------------------------------------------------------------------------------------------------------------------------------------------------------------------------------------------------------------------------------------------------------------------------------------------------------------------------------------------------------------------------------------------------------------------------------------------------------------------------------------------------------------------------------------|
| <b>CFS</b>          | MYRMQLLSICIALSLALVTNSEFEGSHHHHHHLSITTPPEEMIEKAKGETAYLPCKFTL<br>SPEDQGPLDIEWLISPADNPKVDQVILYSGDKIYDDYYPDLKGRVHFTSNDLKSG<br>DASINVTNLQLSDIGTYQCKVKKAPGVANKKIHLVVLVKPSGARCYPVDGSEEIGSD<br>FKIKCEPKESLPLQYEWQKLSDSQKMPTSWLAEMTSSVISVKNASSEYSGTYSCT<br>VRNRVGSQCLLRNLNVPPSNKAGGSRGLTNSIKANETNIASVTQEVNTAKGNISS<br>LQGDVQALQEAGYIPEAPRDGQAYVRKDGWVFLSTFLSPATRGGGGSGGGGSG<br>GGGSGGGGSELQMTQSPSSLSASVGDRVTITCRTSQSISSYLNWYQQKPGQPPKLLI<br>YWASTRESGVPDRFSGSGSGTDFTLTISSLQPEDSATYYCQQSYDIPYTFGQGTKLE<br>IKGGGGSGGGGSGGGGSEVQLLESGGGVVQPGRSLRLSCAASGFTFSSYGMHWVR<br>QAPGKGLEWVAVISYDGSNKYYADS VKGRFTISRDN SKNTLYLQMNSLRAEDTA<br>VYYCAKDMGWGSGWRPYYYYGMDVWGQTTVTVSSG |
| <b>HF</b>           | MYRMQLLSICIALSLALVTNSEFEGSMGSSHHHHHHSSGLVPRGSHQVQLVQSGAE<br>DKKPGASVKVSKVSGFSLGRYGVHWVRQAPGQGLEWMGVIWRGGTTDYNAKF<br>QGRVTITKDDSKSTVYMESSLRSEDVAVYYCARQGSNFPLAYWGQGLVTVSSG<br>GGGSGGGGSGGGGSDIVMTQSPSSLSASVGDRVTITCKASQSVTNDAAWYQKKPG<br>KAPKLLIYQASTRYTGVPSTRFSGSGYGTDFTLTISSLQPEDFATYFCHQDYSSPLTFG<br>QGTKVEIKRGGGGSGGGGSGGGGSTRRGLTNSIKANETNIASVTQEVNTAKGNISS<br>LQGDVQALQEAGYIPEAPRDGQAYVRKDGWVFLSTFLSPAELVLFQ                                                                                                                                                                                                                                          |

## **SUPPLEMENTAL MATERIALS AND METHODS**

### **Proliferation and colony formation**

CCK-8 Kit (Dojindo Laboratories) was used to validate cell proliferation. The cells were planted in the 96-well plates, and the cells were tested by CCK-8 for 24 h, 48 h, 72 h and 96 h. The colony formation assay was performed by seeding 1000 cells in one well of a 6-well plate. After 7 to 10 days later, the colonies were stained with crystal violet solution, and the colony numbers were counted.
